# Supplementary material for: Assessing healthy vaccinee effect in COVID-19 vaccine effectiveness studies: a national cohort study in Qatar
Source: eLife. 2025 Jun 9;14:e103690. doi: 10.7554/eLife.103690 (PMC12148324; doi:10.7554/eLife.103690)
Supplement: Figure 1—source data 1. [file elife-103690-fig1-data1.xlsx]

## Sheet: Figure 1A
Cohort	time	at_risk	fail	net_lost	CumulativeIncidence	lb100	ub100
Unvaccinated	1	812583	2	9026	0.000246129	6.15563e-05	0.000984127
Unvaccinated	2	803555	8	8177	0.0012417	0.000668101	0.00230776
Unvaccinated	3	795370	5	8253	0.00187033	0.00112755	0.00310242
Unvaccinated	4	787112	8	7905	0.00288669	0.00191825	0.00434404
Unvaccinated	5	779199	7	7635	0.00378502	0.00264636	0.00541359
Unvaccinated	6	771557	5	7786	0.00443304	0.00318279	0.00617439
Unvaccinated	7	763766	2	7720	0.00469488	0.00340151	0.00648004
Unvaccinated	8	756044	3	7446	0.00509167	0.00373465	0.00694174
Unvaccinated	9	748595	2	7155	0.00535882	0.00396003	0.00725169
Unvaccinated	10	741438	3	7022	0.00576342	0.00430282	0.0077198
Unvaccinated	11	734413	2	6800	0.00603573	0.00453445	0.00803404
Unvaccinated	12	727611	5	6577	0.00672287	0.00512215	0.00882381
Unvaccinated	13	721029	4	6474	0.00727759	0.00559973	0.00945818
Unvaccinated	14	714551	2	6454	0.00755747	0.00584154	0.00977742
Unvaccinated	15	708095	4	6086	0.00812232	0.00633116	0.0104202
Unvaccinated	16	702005	3	5734	0.00854964	0.00670293	0.0109051
Unvaccinated	17	696268	0	5692	0.00854964	0.00670293	0.0109051
Unvaccinated	18	690576	2	5642	0.00883922	0.0069552	0.0112336
Unvaccinated	19	684932	1	5637	0.00898521	0.00708248	0.0113991
Unvaccinated	20	679294	0	5626	0.00898521	0.00708248	0.0113991
Unvaccinated	21	673668	3	5592	0.00943049	0.00747093	0.011904
Unvaccinated	22	668073	1	4876	0.00958016	0.00760168	0.0120736
Unvaccinated	23	663196	2	4610	0.00988171	0.00786534	0.012415
Unvaccinated	24	658584	2	4500	0.0101854	0.00813125	0.0127583
Unvaccinated	25	654082	2	4499	0.0104911	0.00839937	0.0131037
Unvaccinated	26	649581	2	4474	0.010799	0.00866971	0.0134511
Unvaccinated	27	645105	3	4359	0.0112639	0.00907878	0.013975
Unvaccinated	28	640743	4	4454	0.0118882	0.00962941	0.0146767
Unvaccinated	29	636285	1	4031	0.0120453	0.00976825	0.0148531
Unvaccinated	30	632253	3	3935	0.0125197	0.0101879	0.0153853
Unvaccinated	31	628315	2	3897	0.012838	0.0104698	0.0157418
Unvaccinated	32	624416	4	3723	0.0134785	0.0110383	0.0164581
Unvaccinated	33	620689	0	3573	0.0134785	0.0110383	0.0164581
Unvaccinated	34	617116	4	3653	0.0141266	0.0116146	0.0171818
Unvaccinated	35	613459	0	3514	0.0141266	0.0116146	0.0171818
Unvaccinated	36	609945	1	3324	0.0142905	0.0117605	0.0173648
Unvaccinated	37	606620	1	3190	0.0144554	0.0119072	0.0175487
Unvaccinated	38	603429	1	3142	0.0146211	0.0120548	0.0177336
Unvaccinated	39	600286	0	3099	0.0146211	0.0120548	0.0177336
Unvaccinated	40	597187	2	3004	0.0149559	0.0123529	0.0181074
Unvaccinated	41	594181	1	3005	0.0151242	0.0125028	0.0182951
Unvaccinated	42	591175	1	3020	0.0152933	0.0126535	0.0184838
Unvaccinated	43	588154	0	2925	0.0152933	0.0126535	0.0184838
Unvaccinated	44	585229	0	2868	0.0152933	0.0126535	0.0184838
Unvaccinated	45	582361	2	2772	0.0156367	0.0129594	0.0188671
Unvaccinated	46	579587	1	2741	0.0158092	0.0131131	0.0190595
Unvaccinated	47	576845	0	2634	0.0158092	0.0131131	0.0190595
Unvaccinated	48	574211	0	2684	0.0158092	0.0131131	0.0190595
Unvaccinated	49	571527	3	2623	0.016334	0.0135809	0.0196452
Unvaccinated	50	568901	0	2488	0.016334	0.0135809	0.0196452
Unvaccinated	51	566413	1	2414	0.0165105	0.0137383	0.0198421
Unvaccinated	52	563998	1	2495	0.0166878	0.0138965	0.0200398
Unvaccinated	53	561502	2	2362	0.017044	0.0142143	0.0204368
Unvaccinated	54	559138	1	2470	0.0172228	0.014374	0.020636
Unvaccinated	55	556667	1	2394	0.0174024	0.0145345	0.0208361
Unvaccinated	56	554272	1	2485	0.0175828	0.0146957	0.021037
Unvaccinated	57	551786	0	2232	0.0175828	0.0146957	0.021037
Unvaccinated	58	549554	1	2271	0.0177647	0.0148582	0.0212396
Unvaccinated	59	547282	2	2062	0.0181301	0.0151849	0.0216464
Unvaccinated	60	545218	1	2144	0.0183135	0.0153489	0.0218505
Unvaccinated	61	543073	0	1998	0.0183135	0.0153489	0.0218505
Unvaccinated	62	541075	0	2094	0.0183135	0.0153489	0.0218505
Unvaccinated	63	538981	2	2199	0.0186845	0.0156808	0.0222634
Unvaccinated	64	536780	3	1965	0.0192432	0.0161812	0.0228847
Unvaccinated	65	534812	0	1931	0.0192432	0.0161812	0.0228847
Unvaccinated	66	532881	1	1908	0.0194309	0.0163493	0.0230932
Unvaccinated	67	530972	1	1878	0.0196192	0.0165181	0.0233024
Unvaccinated	68	529093	1	1822	0.0198081	0.0166875	0.0235122
Unvaccinated	69	527270	2	1840	0.0201874	0.0170277	0.0239332
Unvaccinated	70	525428	0	1929	0.0201874	0.0170277	0.0239332
Unvaccinated	71	523499	1	1657	0.0203783	0.0171991	0.0241452
Unvaccinated	72	521841	1	1701	0.0205699	0.0173711	0.0243578
Unvaccinated	73	520139	1	1593	0.0207622	0.0175437	0.024571
Unvaccinated	74	518545	0	1571	0.0207622	0.0175437	0.024571
Unvaccinated	75	516974	1	1588	0.0209555	0.0177173	0.0247856
Unvaccinated	76	515385	1	1560	0.0211495	0.0178915	0.0250007
Unvaccinated	77	513824	0	1643	0.0211495	0.0178915	0.0250007
Unvaccinated	78	512181	1	1506	0.0213447	0.0180668	0.0252173
Unvaccinated	79	510674	0	1433	0.0213447	0.0180668	0.0252173
Unvaccinated	80	509241	3	1463	0.0219337	0.0185962	0.0258702
Unvaccinated	81	507775	0	1382	0.0219337	0.0185962	0.0258702
Unvaccinated	82	506393	0	1368	0.0219337	0.0185962	0.0258702
Unvaccinated	83	505025	0	1405	0.0219337	0.0185962	0.0258702
Unvaccinated	84	503620	1	1462	0.0221322	0.0187746	0.0260903
Unvaccinated	85	502157	0	1377	0.0221322	0.0187746	0.0260903
Unvaccinated	86	500780	2	1319	0.0225315	0.0191336	0.0265328
Unvaccinated	87	499459	2	1303	0.0229319	0.0194939	0.0269761
Unvaccinated	88	498154	0	1281	0.0229319	0.0194939	0.0269761
Unvaccinated	89	496873	0	1214	0.0229319	0.0194939	0.0269761
Unvaccinated	90	495659	0	1287	0.0229319	0.0194939	0.0269761
Unvaccinated	91	494372	0	1303	0.0229319	0.0194939	0.0269761
Unvaccinated	92	493069	0	1246	0.0229319	0.0194939	0.0269761
Unvaccinated	93	491823	0	1107	0.0229319	0.0194939	0.0269761
Unvaccinated	94	490716	3	1100	0.0235431	0.0200438	0.0276533
Unvaccinated	95	489613	0	1208	0.0235431	0.0200438	0.0276533
Unvaccinated	96	488405	0	1152	0.0235431	0.0200438	0.0276533
Unvaccinated	97	487253	0	1179	0.0235431	0.0200438	0.0276533
Unvaccinated	98	486074	1	1167	0.0237488	0.0202288	0.0278811
Unvaccinated	99	484906	0	1148	0.0237488	0.0202288	0.0278811
Unvaccinated	100	483758	0	1099	0.0237488	0.0202288	0.0278811
Unvaccinated	101	482659	0	991	0.0237488	0.0202288	0.0278811
Unvaccinated	102	481668	0	977	0.0237488	0.0202288	0.0278811
Unvaccinated	103	480691	2	1039	0.0241647	0.0206031	0.028342
Unvaccinated	104	479650	1	1033	0.0243732	0.0207907	0.0285728
Unvaccinated	105	478616	2	1153	0.0247909	0.0211671	0.0290351
Unvaccinated	106	477461	0	985	0.0247909	0.0211671	0.0290351
Unvaccinated	107	476476	1	923	0.0250008	0.0213562	0.0292672
Unvaccinated	108	475552	3	961	0.0256315	0.0219251	0.0299643
Unvaccinated	109	474588	1	906	0.0258421	0.0221152	0.0301969
Unvaccinated	110	473681	1	927	0.0260532	0.0223059	0.0304299
Unvaccinated	111	472753	0	969	0.0260532	0.0223059	0.0304299
Unvaccinated	112	471784	0	1037	0.0260532	0.0223059	0.0304299
Unvaccinated	113	470747	0	906	0.0260532	0.0223059	0.0304299
Unvaccinated	114	469841	1	847	0.0262659	0.022498	0.0306649
Unvaccinated	115	468993	0	887	0.0262659	0.022498	0.0306649
Unvaccinated	116	468106	0	885	0.0262659	0.022498	0.0306649
Unvaccinated	117	467221	1	874	0.0264799	0.0226912	0.0309012
Unvaccinated	118	466346	1	884	0.0266943	0.0228848	0.0311378
Unvaccinated	119	465461	1	864	0.0269091	0.0230789	0.0313749
Unvaccinated	120	464596	1	893	0.0271243	0.0232734	0.0316123
Unvaccinated	121	463702	0	829	0.0271243	0.0232734	0.0316123
Unvaccinated	122	462873	1	803	0.0273402	0.0234686	0.0318505
Unvaccinated	123	462069	1	804	0.0275566	0.0236642	0.0320891
Unvaccinated	124	461264	3	755	0.0282068	0.0242527	0.0328055
Unvaccinated	125	460506	0	839	0.0282068	0.0242527	0.0328055
Unvaccinated	126	459667	1	829	0.0284243	0.0244497	0.033045
Unvaccinated	127	458837	0	786	0.0284243	0.0244497	0.033045
Unvaccinated	128	458051	1	757	0.0286426	0.0246474	0.0332852
Unvaccinated	129	457293	0	708	0.0286426	0.0246474	0.0332852
Unvaccinated	130	456585	0	729	0.0286426	0.0246474	0.0332852
Unvaccinated	131	455856	0	757	0.0286426	0.0246474	0.0332852
Unvaccinated	132	455099	1	692	0.0288622	0.0248463	0.0335271
Unvaccinated	133	454406	1	793	0.0290822	0.0250456	0.0337693
Unvaccinated	134	453612	0	738	0.0290822	0.0250456	0.0337693
Unvaccinated	135	452874	0	687	0.0290822	0.0250456	0.0337693
Unvaccinated	136	452187	1	655	0.0293033	0.0252459	0.0340127
Unvaccinated	137	451531	1	666	0.0295247	0.0254466	0.0342563
Unvaccinated	138	450864	1	666	0.0297464	0.0256476	0.0345002
Unvaccinated	139	450197	1	660	0.0299685	0.025849	0.0347444
Unvaccinated	140	449536	0	633	0.0299685	0.025849	0.0347444
Unvaccinated	141	448903	1	612	0.0301912	0.026051	0.0349893
Unvaccinated	142	448290	0	542	0.0301912	0.026051	0.0349893
Unvaccinated	143	447748	1	589	0.0304145	0.0262536	0.0352347
Unvaccinated	144	447158	1	587	0.030638	0.0264565	0.0354804
Unvaccinated	145	446570	0	553	0.030638	0.0264565	0.0354804
Unvaccinated	146	446017	2	570	0.0310863	0.0268635	0.0359728
Unvaccinated	147	445445	1	585	0.0313107	0.0270674	0.0362192
Unvaccinated	148	444859	0	590	0.0313107	0.0270674	0.0362192
Unvaccinated	149	444269	1	543	0.0315358	0.0272718	0.0364662
Unvaccinated	150	443725	1	538	0.0317611	0.0274766	0.0367134
Unvaccinated	151	443186	1	539	0.0319866	0.0276817	0.0369609
Unvaccinated	152	442646	0	532	0.0319866	0.0276817	0.0369609
Unvaccinated	153	442114	0	515	0.0319866	0.0276817	0.0369609
Unvaccinated	154	441599	0	610	0.0319866	0.0276817	0.0369609
Unvaccinated	155	440989	0	511	0.0319866	0.0276817	0.0369609
Unvaccinated	156	440478	0	533	0.0319866	0.0276817	0.0369609
Unvaccinated	157	439945	0	562	0.0319866	0.0276817	0.0369609
Unvaccinated	158	439383	1	543	0.0322141	0.0278885	0.0372106
Unvaccinated	159	438839	1	475	0.0324419	0.0280957	0.0374605
Unvaccinated	160	438363	0	488	0.0324419	0.0280957	0.0374605
Unvaccinated	161	437875	0	481	0.0324419	0.0280957	0.0374605
Unvaccinated	162	437394	0	488	0.0324419	0.0280957	0.0374605
Unvaccinated	163	436906	0	502	0.0324419	0.0280957	0.0374605
Unvaccinated	164	436404	0	477	0.0324419	0.0280957	0.0374605
Unvaccinated	165	435927	1	485	0.0326713	0.0283041	0.0377121
Unvaccinated	166	435441	1	483	0.0329008	0.0285129	0.0379639
Unvaccinated	167	434957	1	493	0.0331307	0.028722	0.038216
Unvaccinated	168	434463	0	494	0.0331307	0.028722	0.038216
Unvaccinated	169	433969	0	531	0.0331307	0.028722	0.038216
Unvaccinated	170	433438	1	477	0.0333613	0.0289318	0.0384689
Unvaccinated	171	432960	0	472	0.0333613	0.0289318	0.0384689
Unvaccinated	172	432488	0	464	0.0333613	0.0289318	0.0384689
Unvaccinated	173	432024	0	467	0.0333613	0.0289318	0.0384689
Unvaccinated	174	431557	0	482	0.0333613	0.0289318	0.0384689
Unvaccinated	175	431075	1	559	0.0335932	0.0291428	0.0387232
Unvaccinated	176	430515	0	549	0.0335932	0.0291428	0.0387232
Unvaccinated	177	429966	1	532	0.0338257	0.0293543	0.0389781
Unvaccinated	178	429433	0	556	0.0338257	0.0293543	0.0389781
Unvaccinated	179	428877	0	575	0.0338257	0.0293543	0.0389781
Unvaccinated	180	428302	1	576	0.0340591	0.0295667	0.039234
Unvaccinated	181	427725	0	966	0.0340591	0.0295667	0.039234
Unvaccinated	182	426759	1	1373	0.0342934	0.0297799	0.0394908
Unvaccinated	183	425385	1	1218	0.0345284	0.0299938	0.0397484
Unvaccinated	184	424166	0	1358	0.0345284	0.0299938	0.0397484
Unvaccinated	185	422808	1	1443	0.0347648	0.0302089	0.0400076
Unvaccinated	186	421364	1	1308	0.035002	0.0304249	0.0402677
Unvaccinated	187	420055	0	1174	0.035002	0.0304249	0.0402677
Unvaccinated	188	418881	0	1260	0.035002	0.0304249	0.0402677
Unvaccinated	189	417621	0	1296	0.035002	0.0304249	0.0402677
Unvaccinated	190	416325	0	1176	0.035002	0.0304249	0.0402677
Unvaccinated	191	415149	3	1101	0.0357244	0.031082	0.04106
Unvaccinated	192	414045	1	1088	0.0359658	0.0313018	0.0413247
Unvaccinated	193	412956	1	1086	0.0362079	0.0315222	0.04159
Unvaccinated	194	411869	1	1016	0.0364506	0.0317432	0.041856
Unvaccinated	195	410852	0	1026	0.0364506	0.0317432	0.041856
Unvaccinated	196	409826	1	1130	0.0366945	0.0319653	0.0421233
Unvaccinated	197	408695	0	989	0.0366945	0.0319653	0.0421233
Unvaccinated	198	407706	0	961	0.0366945	0.0319653	0.0421233
Unvaccinated	199	406745	0	981	0.0366945	0.0319653	0.0421233
Unvaccinated	200	405764	0	947	0.0366945	0.0319653	0.0421233
Unvaccinated	201	404817	0	1061	0.0366945	0.0319653	0.0421233
Unvaccinated	202	403756	0	996	0.0366945	0.0319653	0.0421233
Unvaccinated	203	402760	1	1155	0.0369427	0.032191	0.0423957
Unvaccinated	204	401604	0	975	0.0369427	0.032191	0.0423957
Unvaccinated	205	400629	0	936	0.0369427	0.032191	0.0423957
Unvaccinated	206	399693	0	904	0.0369427	0.032191	0.0423957
Unvaccinated	207	398789	0	943	0.0369427	0.032191	0.0423957
Unvaccinated	208	397846	0	951	0.0369427	0.032191	0.0423957
Unvaccinated	209	396895	0	970	0.0369427	0.032191	0.0423957
Unvaccinated	210	395925	0	1083	0.0369427	0.032191	0.0423957
Unvaccinated	211	394842	2	976	0.0374491	0.032651	0.042952
Unvaccinated	212	393864	1	1003	0.0377029	0.0328817	0.0432308
Unvaccinated	213	392860	0	941	0.0377029	0.0328817	0.0432308
Unvaccinated	214	391919	0	973	0.0377029	0.0328817	0.0432308
Unvaccinated	215	390946	0	966	0.0377029	0.0328817	0.0432308
Unvaccinated	216	389980	1	1000	0.0379592	0.0331146	0.0435125
Unvaccinated	217	388979	0	1110	0.0379592	0.0331146	0.0435125
Unvaccinated	218	387869	0	1008	0.0379592	0.0331146	0.0435125
Unvaccinated	219	386861	0	920	0.0379592	0.0331146	0.0435125
Unvaccinated	220	385941	0	922	0.0379592	0.0331146	0.0435125
Unvaccinated	221	385019	1	906	0.0382188	0.0333503	0.043798
Unvaccinated	222	384112	0	968	0.0382188	0.0333503	0.043798
Unvaccinated	223	383144	0	909	0.0382188	0.0333503	0.043798
Unvaccinated	224	382235	1	1056	0.0384804	0.0335876	0.0440857
Unvaccinated	225	381178	1	966	0.0387426	0.0338257	0.0443741
Unvaccinated	226	380211	0	977	0.0387426	0.0338257	0.0443741
Unvaccinated	227	379234	0	841	0.0387426	0.0338257	0.0443741
Unvaccinated	228	378393	0	850	0.0387426	0.0338257	0.0443741
Unvaccinated	229	377543	0	843	0.0387426	0.0338257	0.0443741
Unvaccinated	230	376700	0	957	0.0387426	0.0338257	0.0443741
Unvaccinated	231	375743	0	1051	0.0387426	0.0338257	0.0443741
Unvaccinated	232	374692	0	991	0.0387426	0.0338257	0.0443741
Unvaccinated	233	373701	0	922	0.0387426	0.0338257	0.0443741
Unvaccinated	234	372779	0	888	0.0387426	0.0338257	0.0443741
Unvaccinated	235	371891	0	918	0.0387426	0.0338257	0.0443741
Unvaccinated	236	370973	0	943	0.0387426	0.0338257	0.0443741
Unvaccinated	237	370030	0	965	0.0387426	0.0338257	0.0443741
Unvaccinated	238	369065	0	1099	0.0387426	0.0338257	0.0443741
Unvaccinated	239	367966	0	972	0.0387426	0.0338257	0.0443741
Unvaccinated	240	366994	0	1017	0.0387426	0.0338257	0.0443741
Unvaccinated	241	365977	0	1132	0.0387426	0.0338257	0.0443741
Unvaccinated	242	364845	2	1203	0.0392906	0.0343214	0.044979
Unvaccinated	243	363640	1	1167	0.0395655	0.0345702	0.0452823
Unvaccinated	244	362472	1	1321	0.0398412	0.0348199	0.0455865
Unvaccinated	245	361150	0	1600	0.0398412	0.0348199	0.0455865
Unvaccinated	246	359550	0	1411	0.0398412	0.0348199	0.0455865
Unvaccinated	247	358139	0	1250	0.0398412	0.0348199	0.0455865
Unvaccinated	248	356889	1	1207	0.0401213	0.0350732	0.0458959
Unvaccinated	249	355681	0	1240	0.0401213	0.0350732	0.0458959
Unvaccinated	250	354441	1	1144	0.0404033	0.0353282	0.0462074
Unvaccinated	251	353296	0	1119	0.0404033	0.0353282	0.0462074
Unvaccinated	252	352177	0	1273	0.0404033	0.0353282	0.0462074
Unvaccinated	253	350904	0	1253	0.0404033	0.0353282	0.0462074
Unvaccinated	254	349651	0	1051	0.0404033	0.0353282	0.0462074
Unvaccinated	255	348600	0	1064	0.0404033	0.0353282	0.0462074
Unvaccinated	256	347536	0	1051	0.0404033	0.0353282	0.0462074
Unvaccinated	257	346485	0	1002	0.0404033	0.0353282	0.0462074
Unvaccinated	258	345483	0	1064	0.0404033	0.0353282	0.0462074
Unvaccinated	259	344419	0	1071	0.0404033	0.0353282	0.0462074
Unvaccinated	260	343348	0	994	0.0404033	0.0353282	0.0462074
Unvaccinated	261	342354	0	1042	0.0404033	0.0353282	0.0462074
Unvaccinated	262	341312	0	928	0.0404033	0.0353282	0.0462074
Unvaccinated	263	340384	0	933	0.0404033	0.0353282	0.0462074
Unvaccinated	264	339451	1	940	0.0406978	0.0355935	0.046534
Unvaccinated	265	338510	0	928	0.0406978	0.0355935	0.046534
Unvaccinated	266	337582	0	1001	0.0406978	0.0355935	0.046534
Unvaccinated	267	336581	1	922	0.0409948	0.0358609	0.0468634
Unvaccinated	268	335658	0	867	0.0409948	0.0358609	0.0468634
Unvaccinated	269	334791	1	825	0.0412934	0.0361298	0.0471947
Unvaccinated	270	333965	2	895	0.041892	0.0366693	0.0478583
Unvaccinated	271	333068	0	852	0.041892	0.0366693	0.0478583
Unvaccinated	272	332216	0	965	0.041892	0.0366693	0.0478583
Unvaccinated	273	331251	1	961	0.0421937	0.0369413	0.0481928
Unvaccinated	274	330289	0	902	0.0421937	0.0369413	0.0481928
Unvaccinated	275	329387	0	852	0.0421937	0.0369413	0.0481928
Unvaccinated	276	328535	0	880	0.0421937	0.0369413	0.0481928
Unvaccinated	277	327655	0	854	0.0421937	0.0369413	0.0481928
Unvaccinated	278	326801	0	862	0.0421937	0.0369413	0.0481928
Unvaccinated	279	325939	0	870	0.0421937	0.0369413	0.0481928
Unvaccinated	280	325069	0	901	0.0421937	0.0369413	0.0481928
Unvaccinated	281	324168	0	854	0.0421937	0.0369413	0.0481928
Unvaccinated	282	323314	0	783	0.0421937	0.0369413	0.0481928
Unvaccinated	283	322531	0	806	0.0421937	0.0369413	0.0481928
Unvaccinated	284	321725	0	716	0.0421937	0.0369413	0.0481928
Unvaccinated	285	321009	0	697	0.0421937	0.0369413	0.0481928
Unvaccinated	286	320312	0	737	0.0421937	0.0369413	0.0481928
Unvaccinated	287	319575	0	838	0.0421937	0.0369413	0.0481928
Unvaccinated	288	318737	0	722	0.0421937	0.0369413	0.0481928
Unvaccinated	289	318015	0	641	0.0421937	0.0369413	0.0481928
Unvaccinated	290	317374	0	584	0.0421937	0.0369413	0.0481928
Unvaccinated	291	316790	0	567	0.0421937	0.0369413	0.0481928
Unvaccinated	292	316223	0	654	0.0421937	0.0369413	0.0481928
Unvaccinated	293	315569	1	659	0.0425105	0.0372255	0.0485456
Unvaccinated	294	314909	0	664	0.0425105	0.0372255	0.0485456
Unvaccinated	295	314245	0	596	0.0425105	0.0372255	0.0485456
Unvaccinated	296	313649	0	511	0.0425105	0.0372255	0.0485456
Unvaccinated	297	313138	0	563	0.0425105	0.0372255	0.0485456
Unvaccinated	298	312575	0	495	0.0425105	0.0372255	0.0485456
Unvaccinated	299	312080	1	533	0.0428308	0.0375127	0.0489026
Unvaccinated	300	311546	0	549	0.0428308	0.0375127	0.0489026
Unvaccinated	301	310997	0	599	0.0428308	0.0375127	0.0489026
Unvaccinated	302	310398	0	523	0.0428308	0.0375127	0.0489026
Unvaccinated	303	309875	0	512	0.0428308	0.0375127	0.0489026
Unvaccinated	304	309363	0	453	0.0428308	0.0375127	0.0489026
Unvaccinated	305	308910	1	497	0.0431544	0.0378028	0.0492633
Unvaccinated	306	308412	1	450	0.0434785	0.0380935	0.0496245
Unvaccinated	307	307961	0	416	0.0434785	0.0380935	0.0496245
Unvaccinated	308	307545	0	468	0.0434785	0.0380935	0.0496245
Unvaccinated	309	307077	0	472	0.0434785	0.0380935	0.0496245
Unvaccinated	310	306605	0	389	0.0434785	0.0380935	0.0496245
Unvaccinated	311	306216	0	386	0.0434785	0.0380935	0.0496245
Unvaccinated	312	305830	1	364	0.0438053	0.0383866	0.0499888
Unvaccinated	313	305465	1	373	0.0441325	0.0386801	0.0503533
Unvaccinated	314	305091	0	389	0.0441325	0.0386801	0.0503533
Unvaccinated	315	304702	0	442	0.0441325	0.0386801	0.0503533
Unvaccinated	316	304260	0	385	0.0441325	0.0386801	0.0503533
Unvaccinated	317	303875	0	318	0.0441325	0.0386801	0.0503533
Unvaccinated	318	303557	1	322	0.0444618	0.0389755	0.0507202
Unvaccinated	319	303234	0	367	0.0444618	0.0389755	0.0507202
Unvaccinated	320	302867	0	328	0.0444618	0.0389755	0.0507202
Unvaccinated	321	302539	0	333	0.0444618	0.0389755	0.0507202
Unvaccinated	322	302206	0	348	0.0444618	0.0389755	0.0507202
Unvaccinated	323	301858	0	343	0.0444618	0.0389755	0.0507202
Unvaccinated	324	301515	0	309	0.0444618	0.0389755	0.0507202
Unvaccinated	325	301206	0	321	0.0444618	0.0389755	0.0507202
Unvaccinated	326	300885	0	301	0.0444618	0.0389755	0.0507202
Unvaccinated	327	300584	0	278	0.0444618	0.0389755	0.0507202
Unvaccinated	328	300306	0	310	0.0444618	0.0389755	0.0507202
Unvaccinated	329	299996	0	347	0.0444618	0.0389755	0.0507202
Unvaccinated	330	299649	0	320	0.0444618	0.0389755	0.0507202
Unvaccinated	331	299329	0	246	0.0444618	0.0389755	0.0507202
Unvaccinated	332	299083	0	261	0.0444618	0.0389755	0.0507202
Unvaccinated	333	298822	0	281	0.0444618	0.0389755	0.0507202
Unvaccinated	334	298541	0	277	0.0444618	0.0389755	0.0507202
Unvaccinated	335	298264	0	280	0.0444618	0.0389755	0.0507202
Unvaccinated	336	297984	0	270	0.0444618	0.0389755	0.0507202
Unvaccinated	337	297714	1	260	0.0447976	0.0392763	0.0510948
Unvaccinated	338	297453	0	247	0.0447976	0.0392763	0.0510948
Unvaccinated	339	297206	0	267	0.0447976	0.0392763	0.0510948
Unvaccinated	340	296939	0	247	0.0447976	0.0392763	0.0510948
Unvaccinated	341	296692	0	259	0.0447976	0.0392763	0.0510948
Unvaccinated	342	296433	0	244	0.0447976	0.0392763	0.0510948
Unvaccinated	343	296189	0	247	0.0447976	0.0392763	0.0510948
Unvaccinated	344	295942	0	233	0.0447976	0.0392763	0.0510948
Unvaccinated	345	295709	0	229	0.0447976	0.0392763	0.0510948
Unvaccinated	346	295480	0	220	0.0447976	0.0392763	0.0510948
Unvaccinated	347	295260	0	199	0.0447976	0.0392763	0.0510948
Unvaccinated	348	295061	0	208	0.0447976	0.0392763	0.0510948
Unvaccinated	349	294853	0	202	0.0447976	0.0392763	0.0510948
Unvaccinated	350	294651	0	217	0.0447976	0.0392763	0.0510948
Unvaccinated	351	294434	0	197	0.0447976	0.0392763	0.0510948
Unvaccinated	352	294237	0	210	0.0447976	0.0392763	0.0510948
Unvaccinated	353	294027	0	198	0.0447976	0.0392763	0.0510948
Unvaccinated	354	293829	0	187	0.0447976	0.0392763	0.0510948
Unvaccinated	355	293642	0	197	0.0447976	0.0392763	0.0510948
Unvaccinated	356	293445	0	209	0.0447976	0.0392763	0.0510948
Unvaccinated	357	293236	0	229	0.0447976	0.0392763	0.0510948
Unvaccinated	358	293007	1	210	0.0451387	0.0395816	0.0514758
Unvaccinated	359	292796	0	183	0.0451387	0.0395816	0.0514758
Unvaccinated	360	292613	1	176	0.0454803	0.0398875	0.0518571
Unvaccinated	361	292436	0	182	0.0454803	0.0398875	0.0518571
Unvaccinated	362	292254	0	187	0.0454803	0.0398875	0.0518571
Unvaccinated	363	292067	0	211	0.0454803	0.0398875	0.0518571
Unvaccinated	364	291856	0	194	0.0454803	0.0398875	0.0518571
Unvaccinated	365	291662	1	184	0.045823	0.0401944	0.0522395
Unvaccinated	366	291477	0	150	0.045823	0.0401944	0.0522395
Unvaccinated	367	291327	0	156	0.045823	0.0401944	0.0522395
Unvaccinated	368	291171	0	137	0.045823	0.0401944	0.0522395
Unvaccinated	369	291034	1	157	0.0461664	0.0405022	0.0526226
Unvaccinated	370	290876	0	169	0.0461664	0.0405022	0.0526226
Unvaccinated	371	290707	0	175	0.0461664	0.0405022	0.0526226
Unvaccinated	372	290532	0	165	0.0461664	0.0405022	0.0526226
Unvaccinated	373	290367	0	152	0.0461664	0.0405022	0.0526226
Unvaccinated	374	290215	0	135	0.0461664	0.0405022	0.0526226
Unvaccinated	375	290080	1	129	0.046511	0.0408111	0.0530068
Unvaccinated	376	289950	0	141	0.046511	0.0408111	0.0530068
Unvaccinated	377	289809	0	128	0.046511	0.0408111	0.0530068
Unvaccinated	378	289681	0	158	0.046511	0.0408111	0.0530068
Unvaccinated	379	289523	0	135	0.046511	0.0408111	0.0530068
Unvaccinated	380	289388	0	129	0.046511	0.0408111	0.0530068
Unvaccinated	381	289259	0	127	0.046511	0.0408111	0.0530068
Unvaccinated	382	289132	0	128	0.046511	0.0408111	0.0530068
Unvaccinated	383	289004	0	107	0.046511	0.0408111	0.0530068
Unvaccinated	384	288897	0	135	0.046511	0.0408111	0.0530068
Unvaccinated	385	288762	0	136	0.046511	0.0408111	0.0530068
Unvaccinated	386	288626	0	128	0.046511	0.0408111	0.0530068
Unvaccinated	387	288498	0	120	0.046511	0.0408111	0.0530068
Unvaccinated	388	288378	1	108	0.0468576	0.0411218	0.0533933
Unvaccinated	389	288269	0	116	0.0468576	0.0411218	0.0533933
Unvaccinated	390	288153	0	99	0.0468576	0.0411218	0.0533933
Unvaccinated	391	288054	0	126	0.0468576	0.0411218	0.0533933
Unvaccinated	392	287928	0	130	0.0468576	0.0411218	0.0533933
Unvaccinated	393	287798	0	110	0.0468576	0.0411218	0.0533933
Unvaccinated	394	287688	0	109	0.0468576	0.0411218	0.0533933
Unvaccinated	395	287579	0	119	0.0468576	0.0411218	0.0533933
Unvaccinated	396	287460	0	115	0.0468576	0.0411218	0.0533933
Unvaccinated	397	287345	0	99	0.0468576	0.0411218	0.0533933
Unvaccinated	398	287246	0	98	0.0468576	0.0411218	0.0533933
Unvaccinated	399	287148	0	104	0.0468576	0.0411218	0.0533933
Unvaccinated	400	287044	0	115	0.0468576	0.0411218	0.0533933
Unvaccinated	401	286929	0	91	0.0468576	0.0411218	0.0533933
Unvaccinated	402	286838	0	89	0.0468576	0.0411218	0.0533933
Unvaccinated	403	286749	0	104	0.0468576	0.0411218	0.0533933
Unvaccinated	404	286645	0	106	0.0468576	0.0411218	0.0533933
Unvaccinated	405	286539	1	100	0.0472065	0.0414345	0.0537822
Unvaccinated	406	286438	0	98	0.0472065	0.0414345	0.0537822
Unvaccinated	407	286340	0	99	0.0472065	0.0414345	0.0537822
Unvaccinated	408	286241	0	113	0.0472065	0.0414345	0.0537822
Unvaccinated	409	286128	0	88	0.0472065	0.0414345	0.0537822
Unvaccinated	410	286040	0	94	0.0472065	0.0414345	0.0537822
Unvaccinated	411	285946	1	97	0.047556	0.041748	0.0541718
Unvaccinated	412	285848	0	89	0.047556	0.041748	0.0541718
Unvaccinated	413	285759	0	89	0.047556	0.041748	0.0541718
Unvaccinated	414	285670	0	82	0.047556	0.041748	0.0541718
Unvaccinated	415	285588	0	78	0.047556	0.041748	0.0541718
Unvaccinated	416	285510	0	85	0.047556	0.041748	0.0541718
Unvaccinated	417	285425	0	90	0.047556	0.041748	0.0541718
Unvaccinated	418	285335	0	82	0.047556	0.041748	0.0541718
Unvaccinated	419	285253	0	84	0.047556	0.041748	0.0541718
Unvaccinated	420	285169	1	98	0.0479065	0.0420625	0.0545623
Unvaccinated	421	285070	0	79	0.0479065	0.0420625	0.0545623
Unvaccinated	422	284991	0	79	0.0479065	0.0420625	0.0545623
Unvaccinated	423	284912	0	79	0.0479065	0.0420625	0.0545623
Unvaccinated	424	284833	0	82	0.0479065	0.0420625	0.0545623
Unvaccinated	425	284751	0	97	0.0479065	0.0420625	0.0545623
Unvaccinated	426	284654	0	73	0.0479065	0.0420625	0.0545623
Unvaccinated	427	284581	0	80	0.0479065	0.0420625	0.0545623
Unvaccinated	428	284501	0	87	0.0479065	0.0420625	0.0545623
Unvaccinated	429	284414	0	65	0.0479065	0.0420625	0.0545623
Unvaccinated	430	284349	0	87	0.0479065	0.0420625	0.0545623
Unvaccinated	431	284262	0	90	0.0479065	0.0420625	0.0545623
Unvaccinated	432	284172	0	78	0.0479065	0.0420625	0.0545623
Unvaccinated	433	284094	1	65	0.0482583	0.0423782	0.0549542
Unvaccinated	434	284028	0	65	0.0482583	0.0423782	0.0549542
Unvaccinated	435	283963	0	71	0.0482583	0.0423782	0.0549542
Unvaccinated	436	283892	0	71	0.0482583	0.0423782	0.0549542
Unvaccinated	437	283821	0	75	0.0482583	0.0423782	0.0549542
Unvaccinated	438	283746	0	64	0.0482583	0.0423782	0.0549542
Unvaccinated	439	283682	0	72	0.0482583	0.0423782	0.0549542
Unvaccinated	440	283610	0	78	0.0482583	0.0423782	0.0549542
Unvaccinated	441	283532	0	68	0.0482583	0.0423782	0.0549542
Unvaccinated	442	283464	0	79	0.0482583	0.0423782	0.0549542
Unvaccinated	443	283385	0	68	0.0482583	0.0423782	0.0549542
Unvaccinated	444	283317	0	64	0.0482583	0.0423782	0.0549542
Unvaccinated	445	283253	0	68	0.0482583	0.0423782	0.0549542
Unvaccinated	446	283185	0	60	0.0482583	0.0423782	0.0549542
Unvaccinated	447	283125	0	61	0.0482583	0.0423782	0.0549542
Unvaccinated	448	283064	0	64	0.0482583	0.0423782	0.0549542
Unvaccinated	449	283000	0	61	0.0482583	0.0423782	0.0549542
Unvaccinated	450	282939	1	63	0.0486116	0.0426953	0.0553475
Unvaccinated	451	282875	0	36	0.0486116	0.0426953	0.0553475
Unvaccinated	452	282839	0	52	0.0486116	0.0426953	0.0553475
Unvaccinated	453	282787	0	49	0.0486116	0.0426953	0.0553475
Unvaccinated	454	282738	0	56	0.0486116	0.0426953	0.0553475
Unvaccinated	455	282682	0	67	0.0486116	0.0426953	0.0553475
Unvaccinated	456	282615	0	54	0.0486116	0.0426953	0.0553475
Unvaccinated	457	282561	0	52	0.0486116	0.0426953	0.0553475
Unvaccinated	458	282509	0	56	0.0486116	0.0426953	0.0553475
Unvaccinated	459	282453	0	59	0.0486116	0.0426953	0.0553475
Unvaccinated	460	282394	1	55	0.0489655	0.0430131	0.0557415
Unvaccinated	461	282338	0	38	0.0489655	0.0430131	0.0557415
Unvaccinated	462	282300	0	58	0.0489655	0.0430131	0.0557415
Unvaccinated	463	282242	0	55	0.0489655	0.0430131	0.0557415
Unvaccinated	464	282187	0	47	0.0489655	0.0430131	0.0557415
Unvaccinated	465	282140	0	51	0.0489655	0.0430131	0.0557415
Unvaccinated	466	282089	0	42	0.0489655	0.0430131	0.0557415
Unvaccinated	467	282047	0	59	0.0489655	0.0430131	0.0557415
Unvaccinated	468	281988	0	49	0.0489655	0.0430131	0.0557415
Unvaccinated	469	281939	0	56	0.0489655	0.0430131	0.0557415
Unvaccinated	470	281883	0	57	0.0489655	0.0430131	0.0557415
Unvaccinated	471	281826	0	51	0.0489655	0.0430131	0.0557415
Unvaccinated	472	281775	0	45	0.0489655	0.0430131	0.0557415
Unvaccinated	473	281730	0	35	0.0489655	0.0430131	0.0557415
Unvaccinated	474	281695	0	48	0.0489655	0.0430131	0.0557415
Unvaccinated	475	281647	0	37	0.0489655	0.0430131	0.0557415
Unvaccinated	476	281610	0	52	0.0489655	0.0430131	0.0557415
Unvaccinated	477	281558	0	35	0.0489655	0.0430131	0.0557415
Unvaccinated	478	281523	0	38	0.0489655	0.0430131	0.0557415
Unvaccinated	479	281485	0	33	0.0489655	0.0430131	0.0557415
Unvaccinated	480	281452	0	37	0.0489655	0.0430131	0.0557415
Unvaccinated	481	281415	1	44	0.0493207	0.0433321	0.0561367
Unvaccinated	482	281370	0	44	0.0493207	0.0433321	0.0561367
Unvaccinated	483	281326	0	52	0.0493207	0.0433321	0.0561367
Unvaccinated	484	281274	0	46	0.0493207	0.0433321	0.0561367
Unvaccinated	485	281228	0	35	0.0493207	0.0433321	0.0561367
Unvaccinated	486	281193	0	36	0.0493207	0.0433321	0.0561367
Unvaccinated	487	281157	0	24	0.0493207	0.0433321	0.0561367
Unvaccinated	488	281133	0	48	0.0493207	0.0433321	0.0561367
Unvaccinated	489	281085	0	52	0.0493207	0.0433321	0.0561367
Unvaccinated	490	281033	0	51	0.0493207	0.0433321	0.0561367
Unvaccinated	491	280982	0	46	0.0493207	0.0433321	0.0561367
Unvaccinated	492	280936	0	68	0.0493207	0.0433321	0.0561367
Unvaccinated	493	280868	0	32	0.0493207	0.0433321	0.0561367
Unvaccinated	494	280836	0	34	0.0493207	0.0433321	0.0561367
Unvaccinated	495	280802	0	56	0.0493207	0.0433321	0.0561367
Unvaccinated	496	280746	0	39	0.0493207	0.0433321	0.0561367
Unvaccinated	497	280707	0	50	0.0493207	0.0433321	0.0561367
Unvaccinated	498	280657	0	35	0.0493207	0.0433321	0.0561367
Unvaccinated	499	280622	0	29	0.0493207	0.0433321	0.0561367
Unvaccinated	500	280593	1	29	0.0496769	0.0436522	0.056533
Unvaccinated	501	280563	1	29	0.0500332	0.0439724	0.056929
Unvaccinated	502	280533	0	42	0.0500332	0.0439724	0.056929
Unvaccinated	503	280491	0	56	0.0500332	0.0439724	0.056929
Unvaccinated	504	280435	0	45	0.0500332	0.0439724	0.056929
Unvaccinated	505	280390	1	51	0.0503896	0.0442931	0.0573251
Unvaccinated	506	280338	0	43	0.0503896	0.0442931	0.0573251
Unvaccinated	507	280295	0	27	0.0503896	0.0442931	0.0573251
Unvaccinated	508	280268	1	27	0.0507463	0.0446141	0.0577211
Unvaccinated	509	280240	1	54	0.0511029	0.0449352	0.0581169
Unvaccinated	510	280185	0	51	0.0511029	0.0449352	0.0581169
Unvaccinated	511	280134	0	44	0.0511029	0.0449352	0.0581169
Unvaccinated	512	280090	1	36	0.0514598	0.0452568	0.0585127
Unvaccinated	513	280053	0	48	0.0514598	0.0452568	0.0585127
Unvaccinated	514	280005	0	22	0.0514598	0.0452568	0.0585127
Unvaccinated	515	279983	0	30	0.0514598	0.0452568	0.0585127
Unvaccinated	516	279953	1	50	0.0518168	0.0455786	0.0589085
Unvaccinated	517	279902	0	53	0.0518168	0.0455786	0.0589085
Unvaccinated	518	279849	0	42	0.0518168	0.0455786	0.0589085
Unvaccinated	519	279807	0	48	0.0518168	0.0455786	0.0589085
Unvaccinated	520	279759	2	38	0.0525313	0.0462233	0.0597
Unvaccinated	521	279719	0	34	0.0525313	0.0462233	0.0597
Unvaccinated	522	279685	0	27	0.0525313	0.0462233	0.0597
Unvaccinated	523	279658	0	59	0.0525313	0.0462233	0.0597
Unvaccinated	524	279599	0	51	0.0525313	0.0462233	0.0597
Unvaccinated	525	279548	0	50	0.0525313	0.0462233	0.0597
Unvaccinated	526	279498	0	41	0.0525313	0.0462233	0.0597
Unvaccinated	527	279457	0	40	0.0525313	0.0462233	0.0597
Unvaccinated	528	279417	0	38	0.0525313	0.0462233	0.0597
Unvaccinated	529	279379	0	14	0.0525313	0.0462233	0.0597
Unvaccinated	530	279365	0	49	0.0525313	0.0462233	0.0597
Unvaccinated	531	279316	0	52	0.0525313	0.0462233	0.0597
Unvaccinated	532	279264	0	51	0.0525313	0.0462233	0.0597
Unvaccinated	533	279213	0	46	0.0525313	0.0462233	0.0597
Unvaccinated	534	279167	0	57	0.0525313	0.0462233	0.0597
Unvaccinated	535	279110	0	27	0.0525313	0.0462233	0.0597
Unvaccinated	536	279083	0	23	0.0525313	0.0462233	0.0597
Unvaccinated	537	279060	0	54	0.0525313	0.0462233	0.0597
Unvaccinated	538	279006	0	66	0.0525313	0.0462233	0.0597
Unvaccinated	539	278940	1	38	0.0528896	0.0465467	0.0600966
Unvaccinated	540	278901	0	52	0.0528896	0.0465467	0.0600966
Unvaccinated	541	278849	0	61	0.0528896	0.0465467	0.0600966
Unvaccinated	542	278788	0	25	0.0528896	0.0465467	0.0600966
Unvaccinated	543	278763	0	15	0.0528896	0.0465467	0.0600966
Unvaccinated	544	278748	0	54	0.0528896	0.0465467	0.0600966
Unvaccinated	545	278694	0	51	0.0528896	0.0465467	0.0600966
Unvaccinated	546	278643	0	33	0.0528896	0.0465467	0.0600966
Unvaccinated	547	278610	0	57	0.0528896	0.0465467	0.0600966
Unvaccinated	548	278553	0	72	0.0528896	0.0465467	0.0600966
Unvaccinated	549	278481	0	22	0.0528896	0.0465467	0.0600966
Unvaccinated	550	278459	0	19	0.0528896	0.0465467	0.0600966
Unvaccinated	551	278440	0	54	0.0528896	0.0465467	0.0600966
Unvaccinated	552	278386	0	61	0.0528896	0.0465467	0.0600966
Unvaccinated	553	278325	0	50	0.0528896	0.0465467	0.0600966
Unvaccinated	554	278275	0	61	0.0528896	0.0465467	0.0600966
Unvaccinated	555	278214	0	85	0.0528896	0.0465467	0.0600966
Unvaccinated	556	278129	1	21	0.053249	0.0468712	0.0604944
Unvaccinated	557	278107	1	21	0.0536084	0.0471958	0.0608919
Unvaccinated	558	278085	0	76	0.0536084	0.0471958	0.0608919
Unvaccinated	559	278009	0	80	0.0536084	0.0471958	0.0608919
Unvaccinated	560	277929	0	64	0.0536084	0.0471958	0.0608919
Unvaccinated	561	277865	0	77	0.0536084	0.0471958	0.0608919
Unvaccinated	562	277788	0	53	0.0536084	0.0471958	0.0608919
Unvaccinated	563	277735	0	21	0.0536084	0.0471958	0.0608919
Unvaccinated	564	277714	0	14	0.0536084	0.0471958	0.0608919
Unvaccinated	565	277700	0	67	0.0536084	0.0471958	0.0608919
Unvaccinated	566	277633	0	61	0.0536084	0.0471958	0.0608919
Unvaccinated	567	277572	1	42	0.0539684	0.0475212	0.0612901
Unvaccinated	568	277529	0	77	0.0539684	0.0475212	0.0612901
Unvaccinated	569	277452	0	80	0.0539684	0.0475212	0.0612901
Unvaccinated	570	277372	0	20	0.0539684	0.0475212	0.0612901
Unvaccinated	571	277352	0	20	0.0539684	0.0475212	0.0612901
Unvaccinated	572	277332	0	64	0.0539684	0.0475212	0.0612901
Unvaccinated	573	277268	0	57	0.0539684	0.0475212	0.0612901
Unvaccinated	574	277211	0	38	0.0539684	0.0475212	0.0612901
Unvaccinated	575	277173	0	86	0.0539684	0.0475212	0.0612901
Unvaccinated	576	277087	0	92	0.0539684	0.0475212	0.0612901
Unvaccinated	577	276995	0	22	0.0539684	0.0475212	0.0612901
Unvaccinated	578	276973	0	21	0.0539684	0.0475212	0.0612901
Unvaccinated	579	276952	1	83	0.0543293	0.0478474	0.061689
Unvaccinated	580	276868	0	62	0.0543293	0.0478474	0.061689
Unvaccinated	581	276806	0	39	0.0543293	0.0478474	0.061689
Unvaccinated	582	276767	0	72	0.0543293	0.0478474	0.061689
Unvaccinated	583	276695	0	86	0.0543293	0.0478474	0.061689
Unvaccinated	584	276609	0	28	0.0543293	0.0478474	0.061689
Unvaccinated	585	276581	0	14	0.0543293	0.0478474	0.061689
Unvaccinated	586	276567	0	80	0.0543293	0.0478474	0.061689
Unvaccinated	587	276487	0	76	0.0543293	0.0478474	0.061689
Unvaccinated	588	276411	0	84	0.0543293	0.0478474	0.061689
Unvaccinated	589	276327	0	66	0.0543293	0.0478474	0.061689
Unvaccinated	590	276261	0	91	0.0543293	0.0478474	0.061689
Unvaccinated	591	276170	0	19	0.0543293	0.0478474	0.061689
Unvaccinated	592	276151	0	15	0.0543293	0.0478474	0.061689
Unvaccinated	593	276136	0	85	0.0543293	0.0478474	0.061689
Unvaccinated	594	276051	0	70	0.0543293	0.0478474	0.061689
Unvaccinated	595	275981	0	64	0.0543293	0.0478474	0.061689
Unvaccinated	596	275917	0	80	0.0543293	0.0478474	0.061689
Unvaccinated	597	275837	0	110	0.0543293	0.0478474	0.061689
Unvaccinated	598	275727	0	27	0.0543293	0.0478474	0.061689
Unvaccinated	599	275700	0	12	0.0543293	0.0478474	0.061689
Unvaccinated	600	275688	0	133	0.0543293	0.0478474	0.061689
Unvaccinated	601	275555	0	98	0.0543293	0.0478474	0.061689
Unvaccinated	602	275457	0	70	0.0543293	0.0478474	0.061689
Unvaccinated	603	275387	0	98	0.0543293	0.0478474	0.061689
Unvaccinated	604	275289	2	82	0.0550554	0.0485039	0.0624916
Unvaccinated	605	275205	0	18	0.0550554	0.0485039	0.0624916
Unvaccinated	606	275187	0	26	0.0550554	0.0485039	0.0624916
Unvaccinated	607	275161	0	65	0.0550554	0.0485039	0.0624916
Unvaccinated	608	275096	0	48	0.0550554	0.0485039	0.0624916
Unvaccinated	609	275048	1	36	0.0554188	0.0488327	0.0628929
Unvaccinated	610	275011	0	37	0.0554188	0.0488327	0.0628929
Unvaccinated	611	274974	0	49	0.0554188	0.0488327	0.0628929
Unvaccinated	612	274925	1	25	0.0557823	0.0491618	0.0632942
Unvaccinated	613	274899	0	11	0.0557823	0.0491618	0.0632942
Unvaccinated	614	274888	0	98	0.0557823	0.0491618	0.0632942
Unvaccinated	615	274790	0	68	0.0557823	0.0491618	0.0632942
Unvaccinated	616	274722	0	68	0.0557823	0.0491618	0.0632942
Unvaccinated	617	274654	0	79	0.0557823	0.0491618	0.0632942
Unvaccinated	618	274575	1	99	0.0561463	0.0494914	0.0636959
Unvaccinated	619	274475	0	22	0.0561463	0.0494914	0.0636959
Unvaccinated	620	274453	0	17	0.0561463	0.0494914	0.0636959
Unvaccinated	621	274436	1	76	0.0565105	0.0498213	0.0640976
Unvaccinated	622	274359	0	74	0.0565105	0.0498213	0.0640976
Unvaccinated	623	274285	0	84	0.0565105	0.0498213	0.0640976
Unvaccinated	624	274201	0	80	0.0565105	0.0498213	0.0640976
Unvaccinated	625	274121	0	95	0.0565105	0.0498213	0.0640976
Unvaccinated	626	274026	0	28	0.0565105	0.0498213	0.0640976
Unvaccinated	627	273998	0	22	0.0565105	0.0498213	0.0640976
Unvaccinated	628	273976	0	110	0.0565105	0.0498213	0.0640976
Unvaccinated	629	273866	0	78	0.0565105	0.0498213	0.0640976
Unvaccinated	630	273788	0	94	0.0565105	0.0498213	0.0640976
Unvaccinated	631	273694	0	90	0.0565105	0.0498213	0.0640976
Unvaccinated	632	273604	0	113	0.0565105	0.0498213	0.0640976
Unvaccinated	633	273491	0	21	0.0565105	0.0498213	0.0640976
Unvaccinated	634	273470	0	12	0.0565105	0.0498213	0.0640976
Unvaccinated	635	273458	1	66	0.056876	0.0501524	0.0645006
Unvaccinated	636	273391	0	59	0.056876	0.0501524	0.0645006
Unvaccinated	637	273332	0	46	0.056876	0.0501524	0.0645006
Unvaccinated	638	273286	0	67	0.056876	0.0501524	0.0645006
Unvaccinated	639	273219	0	41	0.056876	0.0501524	0.0645006
Unvaccinated	640	273178	0	22	0.056876	0.0501524	0.0645006
Unvaccinated	641	273156	0	13	0.056876	0.0501524	0.0645006
Unvaccinated	642	273143	0	95	0.056876	0.0501524	0.0645006
Unvaccinated	643	273048	1	93	0.057242	0.0504842	0.0649042
Unvaccinated	644	272954	0	79	0.057242	0.0504842	0.0649042
Unvaccinated	645	272875	0	107	0.057242	0.0504842	0.0649042
Unvaccinated	646	272768	0	127	0.057242	0.0504842	0.0649042
Unvaccinated	647	272641	0	27	0.057242	0.0504842	0.0649042
Unvaccinated	648	272614	0	14	0.057242	0.0504842	0.0649042
Unvaccinated	649	272600	0	132	0.057242	0.0504842	0.0649042
Unvaccinated	650	272468	0	100	0.057242	0.0504842	0.0649042
Unvaccinated	651	272368	0	103	0.057242	0.0504842	0.0649042
Unvaccinated	652	272265	0	102	0.057242	0.0504842	0.0649042
Unvaccinated	653	272163	0	121	0.057242	0.0504842	0.0649042
Unvaccinated	654	272042	0	36	0.057242	0.0504842	0.0649042
Unvaccinated	655	272006	0	30	0.057242	0.0504842	0.0649042
Unvaccinated	656	271976	0	165	0.057242	0.0504842	0.0649042
Unvaccinated	657	271811	0	101	0.057242	0.0504842	0.0649042
Unvaccinated	658	271710	0	120	0.057242	0.0504842	0.0649042
Unvaccinated	659	271590	0	125	0.057242	0.0504842	0.0649042
Unvaccinated	660	271465	0	136	0.057242	0.0504842	0.0649042
Unvaccinated	661	271329	0	35	0.057242	0.0504842	0.0649042
Unvaccinated	662	271294	1	22	0.0576104	0.050818	0.0653104
Unvaccinated	663	271271	0	185	0.0576104	0.050818	0.0653104
Unvaccinated	664	271086	0	107	0.0576104	0.050818	0.0653104
Unvaccinated	665	270979	0	120	0.0576104	0.050818	0.0653104
Unvaccinated	666	270859	0	134	0.0576104	0.050818	0.0653104
Unvaccinated	667	270725	0	158	0.0576104	0.050818	0.0653104
Unvaccinated	668	270567	0	58	0.0576104	0.050818	0.0653104
Unvaccinated	669	270509	0	54	0.0576104	0.050818	0.0653104
Unvaccinated	670	270455	0	170	0.0576104	0.050818	0.0653104
Unvaccinated	671	270285	0	163	0.0576104	0.050818	0.0653104
Unvaccinated	672	270122	0	136	0.0576104	0.050818	0.0653104
Unvaccinated	673	269986	0	108	0.0576104	0.050818	0.0653104
Unvaccinated	674	269878	0	99	0.0576104	0.050818	0.0653104
Unvaccinated	675	269779	0	28	0.0576104	0.050818	0.0653104
Unvaccinated	676	269751	0	16	0.0576104	0.050818	0.0653104
Unvaccinated	677	269735	0	106	0.0576104	0.050818	0.0653104
Unvaccinated	678	269629	1	80	0.0579811	0.0511539	0.0657191
Unvaccinated	679	269548	0	51	0.0579811	0.0511539	0.0657191
Unvaccinated	680	269497	0	48	0.0579811	0.0511539	0.0657191
Unvaccinated	681	269449	1	76	0.058352	0.0514902	0.066128
Unvaccinated	682	269372	0	34	0.058352	0.0514902	0.066128
Unvaccinated	683	269338	0	44	0.058352	0.0514902	0.066128
Unvaccinated	684	269294	0	102	0.058352	0.0514902	0.066128
Unvaccinated	685	269192	0	74	0.058352	0.0514902	0.066128
Unvaccinated	686	269118	0	72	0.058352	0.0514902	0.066128
Unvaccinated	687	269046	0	97	0.058352	0.0514902	0.066128
Unvaccinated	688	268949	0	93	0.058352	0.0514902	0.066128
Unvaccinated	689	268856	0	34	0.058352	0.0514902	0.066128
Unvaccinated	690	268822	0	23	0.058352	0.0514902	0.066128
Unvaccinated	691	268799	0	120	0.058352	0.0514902	0.066128
Unvaccinated	692	268679	0	119	0.058352	0.0514902	0.066128
Unvaccinated	693	268560	0	99	0.058352	0.0514902	0.066128
Unvaccinated	694	268461	0	98	0.058352	0.0514902	0.066128
Unvaccinated	695	268363	1	92	0.0587244	0.0518278	0.0665384
Unvaccinated	696	268270	0	53	0.0587244	0.0518278	0.0665384
Unvaccinated	697	268217	0	42	0.0587244	0.0518278	0.0665384
Unvaccinated	698	268175	0	118	0.0587244	0.0518278	0.0665384
Unvaccinated	699	268057	0	123	0.0587244	0.0518278	0.0665384
Unvaccinated	700	267934	0	118	0.0587244	0.0518278	0.0665384
Unvaccinated	701	267816	0	86	0.0587244	0.0518278	0.0665384
Unvaccinated	702	267730	0	92	0.0587244	0.0518278	0.0665384
Unvaccinated	703	267638	0	50	0.0587244	0.0518278	0.0665384
Unvaccinated	704	267588	0	40	0.0587244	0.0518278	0.0665384
Unvaccinated	705	267548	0	58	0.0587244	0.0518278	0.0665384
Unvaccinated	706	267490	1	50	0.059098	0.0521666	0.0669502
Unvaccinated	707	267439	1	49	0.0594717	0.0525056	0.0673618
Unvaccinated	708	267389	1	32	0.0598455	0.0528448	0.0677733
Unvaccinated	709	267356	0	40	0.0598455	0.0528448	0.0677733
Unvaccinated	710	267316	1	27	0.0602194	0.0531843	0.0681847
Unvaccinated	711	267288	0	39	0.0602194	0.0531843	0.0681847
Unvaccinated	712	267249	0	134	0.0602194	0.0531843	0.0681847
Unvaccinated	713	267115	0	108	0.0602194	0.0531843	0.0681847
Unvaccinated	714	267007	0	110	0.0602194	0.0531843	0.0681847
Unvaccinated	715	266897	1	134	0.0605938	0.0535244	0.0685967
Unvaccinated	716	266762	0	139	0.0605938	0.0535244	0.0685967
Unvaccinated	717	266623	0	39	0.0605938	0.0535244	0.0685967
Unvaccinated	718	266584	1	40	0.0609687	0.053865	0.0690089
Unvaccinated	719	266543	0	146	0.0609687	0.053865	0.0690089
Unvaccinated	720	266397	1	91	0.0613438	0.054206	0.0694213
Unvaccinated	721	266305	0	111	0.0613438	0.054206	0.0694213
Unvaccinated	722	266194	0	118	0.0613438	0.054206	0.0694213
Unvaccinated	723	266076	0	166	0.0613438	0.054206	0.0694213
Unvaccinated	724	265910	0	44	0.0613438	0.054206	0.0694213
Unvaccinated	725	265866	0	42	0.0613438	0.054206	0.0694213
Unvaccinated	726	265824	0	165	0.0613438	0.054206	0.0694213
Unvaccinated	727	265659	0	122	0.0613438	0.054206	0.0694213
Unvaccinated	728	265537	0	110	0.0613438	0.054206	0.0694213
Unvaccinated	729	265427	0	141	0.0613438	0.054206	0.0694213
Unvaccinated	730	265286	0	103	0.0613438	0.054206	0.0694213
Unvaccinated	731	265183	2	45	0.0620976	0.0548912	0.0702497
Unvaccinated	732	265136	0	39	0.0620976	0.0548912	0.0702497
Unvaccinated	733	265097	0	139	0.0620976	0.0548912	0.0702497
Unvaccinated	734	264958	1	92	0.0624748	0.0552343	0.070664
Unvaccinated	735	264865	0	87	0.0624748	0.0552343	0.070664
Unvaccinated	736	264778	0	103	0.0624748	0.0552343	0.070664
Unvaccinated	737	264675	0	96	0.0624748	0.0552343	0.070664
Unvaccinated	738	264579	0	41	0.0624748	0.0552343	0.070664
Unvaccinated	739	264538	0	28	0.0624748	0.0552343	0.070664
Unvaccinated	740	264510	0	121	0.0624748	0.0552343	0.070664
Unvaccinated	741	264389	0	129	0.0624748	0.0552343	0.070664
Unvaccinated	742	264260	0	145	0.0624748	0.0552343	0.070664
Unvaccinated	743	264115	0	171	0.0624748	0.0552343	0.070664
Unvaccinated	744	263944	0	154	0.0624748	0.0552343	0.070664
Unvaccinated	745	263790	0	63	0.0624748	0.0552343	0.070664
Unvaccinated	746	263727	0	45	0.0624748	0.0552343	0.070664
Unvaccinated	747	263682	0	156	0.0624748	0.0552343	0.070664
Unvaccinated	748	263526	1	172	0.062854	0.0555792	0.0710806
Unvaccinated	749	263353	0	147	0.062854	0.0555792	0.0710806
Unvaccinated	750	263206	0	177	0.062854	0.0555792	0.0710806
Unvaccinated	751	263029	0	171	0.062854	0.0555792	0.0710806
Unvaccinated	752	262858	0	71	0.062854	0.0555792	0.0710806
Unvaccinated	753	262787	0	58	0.062854	0.0555792	0.0710806
Unvaccinated	754	262729	0	191	0.062854	0.0555792	0.0710806
Unvaccinated	755	262538	0	146	0.062854	0.0555792	0.0710806
Unvaccinated	756	262392	0	168	0.062854	0.0555792	0.0710806
Unvaccinated	757	262224	0	195	0.062854	0.0555792	0.0710806
Unvaccinated	758	262029	0	215	0.062854	0.0555792	0.0710806
Unvaccinated	759	261814	0	89	0.062854	0.0555792	0.0710806
Unvaccinated	760	261725	0	79	0.062854	0.0555792	0.0710806
Unvaccinated	761	261646	0	210	0.062854	0.0555792	0.0710806
Unvaccinated	762	261436	0	203	0.062854	0.0555792	0.0710806
Unvaccinated	763	261233	0	140	0.062854	0.0555792	0.0710806
Unvaccinated	764	261093	0	186	0.062854	0.0555792	0.0710806
Unvaccinated	765	260907	0	229	0.062854	0.0555792	0.0710806
Unvaccinated	766	260678	0	78	0.062854	0.0555792	0.0710806
Unvaccinated	767	260600	0	72	0.062854	0.0555792	0.0710806
Unvaccinated	768	260528	0	213	0.062854	0.0555792	0.0710806
Unvaccinated	769	260315	0	184	0.062854	0.0555792	0.0710806
Unvaccinated	770	260131	0	154	0.062854	0.0555792	0.0710806
Unvaccinated	771	259977	0	216	0.062854	0.0555792	0.0710806
Unvaccinated	772	259761	0	275	0.062854	0.0555792	0.0710806
Unvaccinated	773	259486	0	111	0.062854	0.0555792	0.0710806
Unvaccinated	774	259375	0	96	0.062854	0.0555792	0.0710806
Unvaccinated	775	259279	0	277	0.062854	0.0555792	0.0710806
Unvaccinated	776	259002	0	227	0.062854	0.0555792	0.0710806
Unvaccinated	777	258775	0	266	0.062854	0.0555792	0.0710806
Unvaccinated	778	258509	0	290	0.062854	0.0555792	0.0710806
Unvaccinated	779	258219	1	291	0.063241	0.0559308	0.0715064
Unvaccinated	780	257927	0	158	0.063241	0.0559308	0.0715064
Unvaccinated	781	257769	0	118	0.063241	0.0559308	0.0715064
Unvaccinated	782	257651	0	300	0.063241	0.0559308	0.0715064
Unvaccinated	783	257351	0	321	0.063241	0.0559308	0.0715064
Unvaccinated	784	257030	0	309	0.063241	0.0559308	0.0715064
Unvaccinated	785	256721	0	361	0.063241	0.0559308	0.0715064
Unvaccinated	786	256360	0	361	0.063241	0.0559308	0.0715064
Unvaccinated	787	255999	1	123	0.0636314	0.0562852	0.071936
Unvaccinated	788	255875	0	120	0.0636314	0.0562852	0.071936
Unvaccinated	789	255755	0	321	0.0636314	0.0562852	0.071936
Unvaccinated	790	255434	0	333	0.0636314	0.0562852	0.071936
Unvaccinated	791	255101	0	225	0.0636314	0.0562852	0.071936
Unvaccinated	792	254876	0	314	0.0636314	0.0562852	0.071936
Unvaccinated	793	254562	0	296	0.0636314	0.0562852	0.071936
Unvaccinated	794	254266	0	138	0.0636314	0.0562852	0.071936
Unvaccinated	795	254128	1	139	0.0640246	0.0566422	0.072369
Unvaccinated	796	253988	0	293	0.0640246	0.0566422	0.072369
Unvaccinated	797	253695	0	321	0.0640246	0.0566422	0.072369
Unvaccinated	798	253374	0	272	0.0640246	0.0566422	0.072369
Unvaccinated	799	253102	0	295	0.0640246	0.0566422	0.072369
Unvaccinated	800	252807	0	335	0.0640246	0.0566422	0.072369
Unvaccinated	801	252472	0	163	0.0640246	0.0566422	0.072369
Unvaccinated	802	252309	0	155	0.0640246	0.0566422	0.072369
Unvaccinated	803	252154	0	285	0.0640246	0.0566422	0.072369
Unvaccinated	804	251869	0	282	0.0640246	0.0566422	0.072369
Unvaccinated	805	251587	0	288	0.0640246	0.0566422	0.072369
Unvaccinated	806	251299	0	296	0.0640246	0.0566422	0.072369
Unvaccinated	807	251003	1	283	0.0644228	0.0570033	0.0728076
Unvaccinated	808	250719	0	143	0.0644228	0.0570033	0.0728076
Unvaccinated	809	250576	0	117	0.0644228	0.0570033	0.0728076
Unvaccinated	810	250459	0	254	0.0644228	0.0570033	0.0728076
Unvaccinated	811	250205	0	242	0.0644228	0.0570033	0.0728076
Unvaccinated	812	249963	0	281	0.0644228	0.0570033	0.0728076
Unvaccinated	813	249682	1	276	0.064823	0.0573664	0.0732486
Unvaccinated	814	249405	0	224	0.064823	0.0573664	0.0732486
Unvaccinated	815	249181	0	92	0.064823	0.0573664	0.0732486
Unvaccinated	816	249089	0	98	0.064823	0.0573664	0.0732486
Unvaccinated	817	248991	0	237	0.064823	0.0573664	0.0732486
Unvaccinated	818	248754	0	257	0.064823	0.0573664	0.0732486
Unvaccinated	819	248497	1	198	0.0652252	0.0577312	0.0736916
Unvaccinated	820	248298	0	260	0.0652252	0.0577312	0.0736916
Unvaccinated	821	248038	0	203	0.0652252	0.0577312	0.0736916
Unvaccinated	822	247835	0	110	0.0652252	0.0577312	0.0736916
Unvaccinated	823	247725	0	103	0.0652252	0.0577312	0.0736916
Unvaccinated	824	247622	0	222	0.0652252	0.0577312	0.0736916
Unvaccinated	825	247400	0	226	0.0652252	0.0577312	0.0736916
Unvaccinated	826	247174	0	230	0.0652252	0.0577312	0.0736916
Unvaccinated	827	246944	0	228	0.0652252	0.0577312	0.0736916
Unvaccinated	828	246716	1	223	0.0656303	0.0580986	0.074138
Unvaccinated	829	246492	0	95	0.0656303	0.0580986	0.074138
Unvaccinated	830	246397	0	134	0.0656303	0.0580986	0.074138
Unvaccinated	831	246263	0	292	0.0656303	0.0580986	0.074138
Unvaccinated	832	245971	0	264	0.0656303	0.0580986	0.074138
Unvaccinated	833	245707	0	158	0.0656303	0.0580986	0.074138
Unvaccinated	834	245549	0	199	0.0656303	0.0580986	0.074138
Unvaccinated	835	245350	0	248	0.0656303	0.0580986	0.074138
Unvaccinated	836	245102	0	108	0.0656303	0.0580986	0.074138
Unvaccinated	837	244994	0	94	0.0656303	0.0580986	0.074138
Unvaccinated	838	244900	0	254	0.0656303	0.0580986	0.074138
Unvaccinated	839	244646	0	250	0.0656303	0.0580986	0.074138
Unvaccinated	840	244396	0	240	0.0656303	0.0580986	0.074138
Unvaccinated	841	244156	0	290	0.0656303	0.0580986	0.074138
Unvaccinated	842	243866	0	210	0.0656303	0.0580986	0.074138
Unvaccinated	843	243656	0	108	0.0656303	0.0580986	0.074138
Unvaccinated	844	243548	0	105	0.0656303	0.0580986	0.074138
Unvaccinated	845	243443	0	305	0.0656303	0.0580986	0.074138
Unvaccinated	846	243138	0	294	0.0656303	0.0580986	0.074138
Unvaccinated	847	242844	0	294	0.0656303	0.0580986	0.074138
Unvaccinated	848	242550	0	337	0.0656303	0.0580986	0.074138
Unvaccinated	849	242213	0	393	0.0656303	0.0580986	0.074138
Unvaccinated	850	241820	0	144	0.0656303	0.0580986	0.074138
Unvaccinated	851	241676	0	131	0.0656303	0.0580986	0.074138
Unvaccinated	852	241545	0	410	0.0656303	0.0580986	0.074138
Unvaccinated	853	241135	0	356	0.0656303	0.0580986	0.074138
Unvaccinated	854	240779	0	404	0.0656303	0.0580986	0.074138
Unvaccinated	855	240375	0	360	0.0656303	0.0580986	0.074138
Unvaccinated	856	240015	0	372	0.0656303	0.0580986	0.074138
Unvaccinated	857	239643	0	178	0.0656303	0.0580986	0.074138
Unvaccinated	858	239465	0	187	0.0656303	0.0580986	0.074138
Unvaccinated	859	239278	0	357	0.0656303	0.0580986	0.074138
Unvaccinated	860	238921	0	349	0.0656303	0.0580986	0.074138
Unvaccinated	861	238572	0	339	0.0656303	0.0580986	0.074138
Unvaccinated	862	238233	0	382	0.0656303	0.0580986	0.074138
Unvaccinated	863	237851	0	458	0.0656303	0.0580986	0.074138
Unvaccinated	864	237393	0	167	0.0656303	0.0580986	0.074138
Unvaccinated	865	237226	0	152	0.0656303	0.0580986	0.074138
Unvaccinated	866	237074	0	386	0.0656303	0.0580986	0.074138
Unvaccinated	867	236688	0	402	0.0656303	0.0580986	0.074138
Unvaccinated	868	236286	0	377	0.0656303	0.0580986	0.074138
Unvaccinated	869	235909	0	376	0.0656303	0.0580986	0.074138
Unvaccinated	870	235533	0	427	0.0656303	0.0580986	0.074138
Unvaccinated	871	235106	0	191	0.0656303	0.0580986	0.074138
Unvaccinated	872	234915	0	224	0.0656303	0.0580986	0.074138
Unvaccinated	873	234691	0	493	0.0656303	0.0580986	0.074138
Unvaccinated	874	234198	1	459	0.066057	0.0584838	0.0746105
Unvaccinated	875	233738	0	443	0.066057	0.0584838	0.0746105
Unvaccinated	876	233295	0	504	0.066057	0.0584838	0.0746105
Unvaccinated	877	232791	0	553	0.066057	0.0584838	0.0746105
Unvaccinated	878	232238	0	253	0.066057	0.0584838	0.0746105
Unvaccinated	879	231985	0	209	0.066057	0.0584838	0.0746105
Unvaccinated	880	231776	0	631	0.066057	0.0584838	0.0746105
Unvaccinated	881	231145	0	478	0.066057	0.0584838	0.0746105
Unvaccinated	882	230667	0	526	0.066057	0.0584838	0.0746105
Unvaccinated	883	230141	0	543	0.066057	0.0584838	0.0746105
Unvaccinated	884	229598	0	553	0.066057	0.0584838	0.0746105
Unvaccinated	885	229045	0	323	0.066057	0.0584838	0.0746105
Unvaccinated	886	228722	0	347	0.066057	0.0584838	0.0746105
Unvaccinated	887	228375	0	700	0.066057	0.0584838	0.0746105
Unvaccinated	888	227675	0	514	0.066057	0.0584838	0.0746105
Unvaccinated	889	227161	0	562	0.066057	0.0584838	0.0746105
Unvaccinated	890	226599	0	653	0.066057	0.0584838	0.0746105
Unvaccinated	891	225946	0	623	0.066057	0.0584838	0.0746105
Unvaccinated	892	225323	0	361	0.066057	0.0584838	0.0746105
Unvaccinated	893	224962	1	221	0.0665012	0.0588834	0.0751042
Unvaccinated	894	224740	0	703	0.0665012	0.0588834	0.0751042
Unvaccinated	895	224037	0	530	0.0665012	0.0588834	0.0751042
Unvaccinated	896	223507	0	460	0.0665012	0.0588834	0.0751042
Unvaccinated	897	223047	0	644	0.0665012	0.0588834	0.0751042
Unvaccinated	898	222403	0	635	0.0665012	0.0588834	0.0751042
Unvaccinated	899	221768	0	316	0.0665012	0.0588834	0.0751042
Unvaccinated	900	221452	0	245	0.0665012	0.0588834	0.0751042
Unvaccinated	901	221207	0	543	0.0665012	0.0588834	0.0751042
Unvaccinated	902	220664	0	372	0.0665012	0.0588834	0.0751042
Unvaccinated	903	220292	0	417	0.0665012	0.0588834	0.0751042
Unvaccinated	904	219875	0	459	0.0665012	0.0588834	0.0751042
Unvaccinated	905	219416	0	438	0.0665012	0.0588834	0.0751042
Unvaccinated	906	218978	0	266	0.0665012	0.0588834	0.0751042
Unvaccinated	907	218712	0	314	0.0665012	0.0588834	0.0751042
Unvaccinated	908	218398	0	492	0.0665012	0.0588834	0.0751042
Unvaccinated	909	217906	1	471	0.0669598	0.0592948	0.0756153
Unvaccinated	910	217434	0	471	0.0669598	0.0592948	0.0756153
Unvaccinated	911	216963	0	476	0.0669598	0.0592948	0.0756153
Unvaccinated	912	216487	0	555	0.0669598	0.0592948	0.0756153
Unvaccinated	913	215932	0	319	0.0669598	0.0592948	0.0756153
Unvaccinated	914	215613	0	256	0.0669598	0.0592948	0.0756153
Unvaccinated	915	215357	0	606	0.0669598	0.0592948	0.0756153
Unvaccinated	916	214751	0	468	0.0669598	0.0592948	0.0756153
Unvaccinated	917	214283	0	533	0.0669598	0.0592948	0.0756153
Unvaccinated	918	213750	0	515	0.0669598	0.0592948	0.0756153
Unvaccinated	919	213235	0	630	0.0669598	0.0592948	0.0756153
Unvaccinated	920	212605	1	392	0.0674298	0.0597157	0.0761402
Unvaccinated	921	212212	0	351	0.0674298	0.0597157	0.0761402
Unvaccinated	922	211861	0	606	0.0674298	0.0597157	0.0761402
Unvaccinated	923	211255	0	527	0.0674298	0.0597157	0.0761402
Unvaccinated	924	210728	0	539	0.0674298	0.0597157	0.0761402
Unvaccinated	925	210189	0	584	0.0674298	0.0597157	0.0761402
Unvaccinated	926	209605	0	653	0.0674298	0.0597157	0.0761402
Unvaccinated	927	208952	0	438	0.0674298	0.0597157	0.0761402
Unvaccinated	928	208514	0	433	0.0674298	0.0597157	0.0761402
Unvaccinated	929	208081	0	1134	0.0674298	0.0597157	0.0761402
Unvaccinated	930	206947	0	1241	0.0674298	0.0597157	0.0761402
Unvaccinated	931	205706	0	876	0.0674298	0.0597157	0.0761402
Unvaccinated	932	204830	0	1471	0.0674298	0.0597157	0.0761402
Unvaccinated	933	203359	0	1388	0.0674298	0.0597157	0.0761402
Unvaccinated	934	201971	0	1287	0.0674298	0.0597157	0.0761402
Unvaccinated	935	200684	0	438	0.0674298	0.0597157	0.0761402
Unvaccinated	936	200246	0	2450	0.0674298	0.0597157	0.0761402
Unvaccinated	937	197796	1	1833	0.0679351	0.0601647	0.0767087
Unvaccinated	938	195962	1	1415	0.068445	0.0606178	0.0772826
Unvaccinated	939	194546	0	1689	0.068445	0.0606178	0.0772826
Unvaccinated	940	192857	0	3823	0.068445	0.0606178	0.0772826
Unvaccinated	941	189034	0	1608	0.068445	0.0606178	0.0772826
Unvaccinated	942	187426	0	377	0.068445	0.0606178	0.0772826
Unvaccinated	943	187049	0	2690	0.068445	0.0606178	0.0772826
Unvaccinated	944	184359	1	1792	0.0689871	0.0610963	0.0778966
Unvaccinated	945	182566	0	1992	0.0689871	0.0610963	0.0778966
Unvaccinated	946	180574	0	2039	0.0689871	0.0610963	0.0778966
Unvaccinated	947	178535	0	822	0.0689871	0.0610963	0.0778966
Unvaccinated	948	177713	0	1771	0.0689871	0.0610963	0.0778966
Unvaccinated	949	175942	0	447	0.0689871	0.0610963	0.0778966
Unvaccinated	950	175495	0	3768	0.0689871	0.0610963	0.0778966
Unvaccinated	951	171727	0	3411	0.0689871	0.0610963	0.0778966
Unvaccinated	952	168316	0	1968	0.0689871	0.0610963	0.0778966
Unvaccinated	953	166348	0	3156	0.0689871	0.0610963	0.0778966
Unvaccinated	954	163192	0	2422	0.0689871	0.0610963	0.0778966
Unvaccinated	955	160770	0	2605	0.0689871	0.0610963	0.0778966
Unvaccinated	956	158165	0	433	0.0689871	0.0610963	0.0778966
Unvaccinated	957	157732	0	3355	0.0689871	0.0610963	0.0778966
Unvaccinated	958	154377	0	1899	0.0689871	0.0610963	0.0778966
Unvaccinated	959	152478	0	3341	0.0689871	0.0610963	0.0778966
Unvaccinated	960	149137	0	2613	0.0689871	0.0610963	0.0778966
Unvaccinated	961	146524	0	1501	0.0689871	0.0610963	0.0778966
Unvaccinated	962	145023	0	2301	0.0689871	0.0610963	0.0778966
Unvaccinated	963	142722	0	241	0.0689871	0.0610963	0.0778966
Unvaccinated	964	142481	0	2312	0.0689871	0.0610963	0.0778966
Unvaccinated	965	140169	0	1876	0.0689871	0.0610963	0.0778966
Unvaccinated	966	138293	0	666	0.0689871	0.0610963	0.0778966
Unvaccinated	967	137627	0	2369	0.0689871	0.0610963	0.0778966
Unvaccinated	968	135258	0	4867	0.0689871	0.0610963	0.0778966
Unvaccinated	969	130391	0	453	0.0689871	0.0610963	0.0778966
Unvaccinated	970	129938	0	364	0.0689871	0.0610963	0.0778966
Unvaccinated	971	129574	0	2059	0.0689871	0.0610963	0.0778966
Unvaccinated	972	127515	0	2313	0.0689871	0.0610963	0.0778966
Unvaccinated	973	125202	0	2385	0.0689871	0.0610963	0.0778966
Unvaccinated	974	122817	1	2244	0.0698007	0.0617713	0.0788735
Unvaccinated	975	120572	0	633	0.0698007	0.0617713	0.0788735
Unvaccinated	976	119939	0	260	0.0698007	0.0617713	0.0788735
Unvaccinated	977	119679	0	207	0.0698007	0.0617713	0.0788735
Unvaccinated	978	119472	0	576	0.0698007	0.0617713	0.0788735
Unvaccinated	979	118896	0	3901	0.0698007	0.0617713	0.0788735
Unvaccinated	980	114995	0	399	0.0698007	0.0617713	0.0788735
Unvaccinated	981	114596	0	2203	0.0698007	0.0617713	0.0788735
Unvaccinated	982	112393	0	2370	0.0698007	0.0617713	0.0788735
Unvaccinated	983	110023	0	1726	0.0698007	0.0617713	0.0788735
Unvaccinated	984	108297	0	244	0.0698007	0.0617713	0.0788735
Unvaccinated	985	108053	0	806	0.0698007	0.0617713	0.0788735
Unvaccinated	986	107247	0	810	0.0698007	0.0617713	0.0788735
Unvaccinated	987	106437	1	992	0.0707396	0.0625302	0.0800264
Unvaccinated	988	105444	0	1179	0.0707396	0.0625302	0.0800264
Unvaccinated	989	104265	0	1023	0.0707396	0.0625302	0.0800264
Unvaccinated	990	103242	0	781	0.0707396	0.0625302	0.0800264
Unvaccinated	991	102461	0	430	0.0707396	0.0625302	0.0800264
Unvaccinated	992	102031	0	1816	0.0707396	0.0625302	0.0800264
Unvaccinated	993	100215	0	2201	0.0707396	0.0625302	0.0800264
Unvaccinated	994	98014	0	489	0.0707396	0.0625302	0.0800264
Unvaccinated	995	97525	0	1579	0.0707396	0.0625302	0.0800264
Unvaccinated	996	95946	0	1480	0.0707396	0.0625302	0.0800264
Unvaccinated	997	94466	0	1504	0.0707396	0.0625302	0.0800264
Unvaccinated	998	92962	0	354	0.0707396	0.0625302	0.0800264
Unvaccinated	999	92608	0	1420	0.0707396	0.0625302	0.0800264
Unvaccinated	1000	91188	0	1380	0.0707396	0.0625302	0.0800264
Two-dose	1	812583	0	7758	0
Two-dose	2	804825	0	6831	0
Two-dose	3	797994	1	6766	0.000125314	1.76522e-05	0.000889611
Two-dose	4	791227	0	6285	0.000125314	1.76522e-05	0.000889611
Two-dose	5	784942	3	6041	0.000507508	0.000190472	0.00135224
Two-dose	6	778898	0	6319	0.000507508	0.000190472	0.00135224
Two-dose	7	772579	1	6405	0.000636944	0.000265102	0.00153034
Two-dose	8	766173	1	6348	0.000767462	0.000344768	0.00170838
Two-dose	9	759824	1	6021	0.00089907	0.000428579	0.00188606
Two-dose	10	753802	0	6057	0.00089907	0.000428579	0.00188606
Two-dose	11	747745	1	6063	0.0010328	0.000516433	0.00206548
Two-dose	12	741681	0	5970	0.0010328	0.000516433	0.00206548
Two-dose	13	735711	2	6023	0.00130465	0.000701811	0.0024253
Two-dose	14	729686	0	6127	0.00130465	0.000701811	0.0024253
Two-dose	15	723559	0	5763	0.00130465	0.000701811	0.0024253
Two-dose	16	717796	0	5457	0.00130465	0.000701811	0.0024253
Two-dose	17	712339	1	5504	0.00144503	0.000799989	0.00261016
Two-dose	18	706834	1	5470	0.0015865	0.000900616	0.00279473
Two-dose	19	701363	0	5477	0.0015865	0.000900616	0.00279473
Two-dose	20	695886	1	5509	0.0017302	0.00100414	0.00298124
Two-dose	21	690376	0	5490	0.0017302	0.00100414	0.00298124
Two-dose	22	684886	0	4782	0.0017302	0.00100414	0.00298124
Two-dose	23	680104	1	4501	0.00187724	0.00111109	0.00317165
Two-dose	24	675602	0	4422	0.00187724	0.00111109	0.00317165
Two-dose	25	671180	0	4408	0.00187724	0.00111109	0.00317165
Two-dose	26	666772	0	4416	0.00187724	0.00111109	0.00317165
Two-dose	27	662356	0	4310	0.00187724	0.00111109	0.00317165
Two-dose	28	658046	1	4417	0.0020292	0.00122231	0.00336872
Two-dose	29	653628	0	3971	0.0020292	0.00122231	0.00336872
Two-dose	30	649657	0	3874	0.0020292	0.00122231	0.00336872
Two-dose	31	645783	0	3889	0.0020292	0.00122231	0.00336872
Two-dose	32	641894	1	3702	0.00218498	0.00133716	0.00357035
Two-dose	33	638191	0	3542	0.00218498	0.00133716	0.00357035
Two-dose	34	634649	0	3634	0.00218498	0.00133716	0.00357035
Two-dose	35	631015	1	3508	0.00234345	0.00145496	0.00377451
Two-dose	36	627506	1	3400	0.00250281	0.00157459	0.0039782
Two-dose	37	624105	1	3196	0.00266304	0.00169596	0.00418155
Two-dose	38	620908	0	3176	0.00266304	0.00169596	0.00418155
Two-dose	39	617732	0	3106	0.00266304	0.00169596	0.00418155
Two-dose	40	614626	1	3026	0.00282573	0.00181996	0.00438733
Two-dose	41	611599	0	3026	0.00282573	0.00181996	0.00438733
Two-dose	42	608573	0	3044	0.00282573	0.00181996	0.00438733
Two-dose	43	605529	1	2958	0.00299087	0.00194653	0.00459552
Two-dose	44	602570	1	2908	0.00315682	0.00207464	0.0048035
Two-dose	45	599661	0	2813	0.00315682	0.00207464	0.0048035
Two-dose	46	596848	0	2760	0.00315682	0.00207464	0.0048035
Two-dose	47	594088	0	2653	0.00315682	0.00207464	0.0048035
Two-dose	48	591435	0	2719	0.00315682	0.00207464	0.0048035
Two-dose	49	588716	0	2667	0.00315682	0.00207464	0.0048035
Two-dose	50	586049	0	2549	0.00315682	0.00207464	0.0048035
Two-dose	51	583500	1	2422	0.0033282	0.00220709	0.00501877
Two-dose	52	581077	1	2534	0.00350029	0.00234099	0.00523368
Two-dose	53	578542	0	2450	0.00350029	0.00234099	0.00523368
Two-dose	54	576092	0	2482	0.00350029	0.00234099	0.00523368
Two-dose	55	573610	1	2491	0.00367462	0.00247723	0.00545075
Two-dose	56	571118	0	2545	0.00367462	0.00247723	0.00545075
Two-dose	57	568573	0	2281	0.00367462	0.00247723	0.00545075
Two-dose	58	566292	1	2307	0.0038512	0.00261581	0.00567002
Two-dose	59	563984	0	2099	0.0038512	0.00261581	0.00567002
Two-dose	60	561885	0	2189	0.0038512	0.00261581	0.00567002
Two-dose	61	559696	0	2074	0.0038512	0.00261581	0.00567002
Two-dose	62	557622	0	2126	0.0038512	0.00261581	0.00567002
Two-dose	63	555496	1	2234	0.00403121	0.00275745	0.00589335
Two-dose	64	553261	1	2030	0.00421195	0.00290042	0.0061165
Two-dose	65	551230	0	1973	0.00421195	0.00290042	0.0061165
Two-dose	66	549257	0	1935	0.00421195	0.00290042	0.0061165
Two-dose	67	547322	0	1932	0.00421195	0.00290042	0.0061165
Two-dose	68	545390	0	1867	0.00421195	0.00290042	0.0061165
Two-dose	69	543523	0	1885	0.00421195	0.00290042	0.0061165
Two-dose	70	541638	1	1973	0.00439657	0.00304673	0.00634442
Two-dose	71	539664	0	1720	0.00439657	0.00304673	0.00634442
Two-dose	72	537944	1	1721	0.00458245	0.00319468	0.00657305
Two-dose	73	536222	0	1637	0.00458245	0.00319468	0.00657305
Two-dose	74	534585	0	1649	0.00458245	0.00319468	0.00657305
Two-dose	75	532936	0	1627	0.00458245	0.00319468	0.00657305
Two-dose	76	531309	0	1637	0.00458245	0.00319468	0.00657305
Two-dose	77	529672	1	1720	0.00477124	0.00334531	0.00680494
Two-dose	78	527951	0	1553	0.00477124	0.00334531	0.00680494
Two-dose	79	526398	0	1480	0.00477124	0.00334531	0.00680494
Two-dose	80	524918	0	1521	0.00477124	0.00334531	0.00680494
Two-dose	81	523397	1	1431	0.00496229	0.00349821	0.0070391
Two-dose	82	521965	0	1425	0.00496229	0.00349821	0.0070391
Two-dose	83	520540	1	1452	0.00515439	0.00365255	0.00727371
Two-dose	84	519087	1	1529	0.00534702	0.00380799	0.00750804
Two-dose	85	517557	2	1446	0.00573343	0.00412168	0.00797542
Two-dose	86	516109	2	1367	0.00612093	0.00443864	0.00844079
Two-dose	87	514740	0	1340	0.00612093	0.00443864	0.00844079
Two-dose	88	513400	1	1354	0.00631569	0.00459869	0.00867374
Two-dose	89	512045	0	1275	0.00631569	0.00459869	0.00867374
Two-dose	90	510770	1	1357	0.00651146	0.00476	0.00890736
Two-dose	91	509412	0	1356	0.00651146	0.00476	0.00890736
Two-dose	92	508056	0	1274	0.00651146	0.00476	0.00890736
Two-dose	93	506782	2	1155	0.00690609	0.00508635	0.00937684
Two-dose	94	505625	0	1180	0.00690609	0.00508635	0.00937684
Two-dose	95	504445	0	1258	0.00690609	0.00508635	0.00937684
Two-dose	96	503187	1	1217	0.00710481	0.00525127	0.00961254
Two-dose	97	501969	1	1225	0.00730401	0.00541703	0.00984825
Two-dose	98	500743	0	1221	0.00730401	0.00541703	0.00984825
Two-dose	99	499522	2	1198	0.00770436	0.00575135	0.0103205
Two-dose	100	498322	0	1116	0.00770436	0.00575135	0.0103205
Two-dose	101	497206	0	1047	0.00770436	0.00575135	0.0103205
Two-dose	102	496159	0	1028	0.00770436	0.00575135	0.0103205
Two-dose	103	495131	1	1116	0.00790631	0.00592045	0.0105582
Two-dose	104	494014	0	1121	0.00790631	0.00592045	0.0105582
Two-dose	105	492893	0	1240	0.00790631	0.00592045	0.0105582
Two-dose	106	491653	0	1076	0.00790631	0.00592045	0.0105582
Two-dose	107	490577	1	1047	0.00811014	0.00609132	0.010798
Two-dose	108	489529	1	1029	0.0083144	0.00626295	0.0110378
Two-dose	109	488499	0	953	0.0083144	0.00626295	0.0110378
Two-dose	110	487546	0	977	0.0083144	0.00626295	0.0110378
Two-dose	111	486569	0	1049	0.0083144	0.00626295	0.0110378
Two-dose	112	485520	0	1108	0.0083144	0.00626295	0.0110378
Two-dose	113	484412	0	960	0.0083144	0.00626295	0.0110378
Two-dose	114	483452	0	906	0.0083144	0.00626295	0.0110378
Two-dose	115	482546	0	933	0.0083144	0.00626295	0.0110378
Two-dose	116	481613	0	947	0.0083144	0.00626295	0.0110378
Two-dose	117	480666	0	896	0.0083144	0.00626295	0.0110378
Two-dose	118	479770	0	931	0.0083144	0.00626295	0.0110378
Two-dose	119	478839	0	918	0.0083144	0.00626295	0.0110378
Two-dose	120	477921	0	958	0.0083144	0.00626295	0.0110378
Two-dose	121	476963	0	911	0.0083144	0.00626295	0.0110378
Two-dose	122	476052	1	871	0.00852444	0.00643913	0.011285
Two-dose	123	475180	1	826	0.00873487	0.00661604	0.0115322
Two-dose	124	474353	0	830	0.00873487	0.00661604	0.0115322
Two-dose	125	473523	1	876	0.00894604	0.0067939	0.0117799
Two-dose	126	472646	0	879	0.00894604	0.0067939	0.0117799
Two-dose	127	471767	0	859	0.00894604	0.0067939	0.0117799
Two-dose	128	470908	0	801	0.00894604	0.0067939	0.0117799
Two-dose	129	470107	0	762	0.00894604	0.0067939	0.0117799
Two-dose	130	469345	1	788	0.00915908	0.00697354	0.0120295
Two-dose	131	468556	0	807	0.00915908	0.00697354	0.0120295
Two-dose	132	467749	0	757	0.00915908	0.00697354	0.0120295
Two-dose	133	466992	0	844	0.00915908	0.00697354	0.0120295
Two-dose	134	466148	0	784	0.00915908	0.00697354	0.0120295
Two-dose	135	465364	0	738	0.00915908	0.00697354	0.0120295
Two-dose	136	464626	0	740	0.00915908	0.00697354	0.0120295
Two-dose	137	463886	0	726	0.00915908	0.00697354	0.0120295
Two-dose	138	463160	0	707	0.00915908	0.00697354	0.0120295
Two-dose	139	462453	1	736	0.0093753	0.00715589	0.012283
Two-dose	140	461716	1	724	0.00959186	0.0073389	0.0125364
Two-dose	141	460991	1	645	0.00980876	0.00752257	0.0127897
Two-dose	142	460345	2	618	0.0102432	0.00789153	0.0132956
Two-dose	143	459725	0	639	0.0102432	0.00789153	0.0132956
Two-dose	144	459086	0	639	0.0102432	0.00789153	0.0132956
Two-dose	145	458447	1	619	0.0104613	0.00807723	0.013549
Two-dose	146	457827	0	622	0.0104613	0.00807723	0.013549
Two-dose	147	457205	0	645	0.0104613	0.00807723	0.013549
Two-dose	148	456560	1	635	0.0106803	0.00826396	0.0138031
Two-dose	149	455924	1	623	0.0108996	0.00845127	0.0140572
Two-dose	150	455300	0	618	0.0108996	0.00845127	0.0140572
Two-dose	151	454682	0	601	0.0108996	0.00845127	0.0140572
Two-dose	152	454081	0	572	0.0108996	0.00845127	0.0140572
Two-dose	153	453509	0	605	0.0108996	0.00845127	0.0140572
Two-dose	154	452904	0	681	0.0108996	0.00845127	0.0140572
Two-dose	155	452223	1	572	0.0111207	0.00864025	0.0143132
Two-dose	156	451650	0	583	0.0111207	0.00864025	0.0143132
Two-dose	157	451067	1	609	0.0113424	0.00882999	0.0145696
Two-dose	158	450457	1	590	0.0115643	0.00902029	0.0148259
Two-dose	159	449866	0	539	0.0115643	0.00902029	0.0148259
Two-dose	160	449327	0	560	0.0115643	0.00902029	0.0148259
Two-dose	161	448767	0	605	0.0115643	0.00902029	0.0148259
Two-dose	162	448162	0	564	0.0115643	0.00902029	0.0148259
Two-dose	163	447598	0	555	0.0115643	0.00902029	0.0148259
Two-dose	164	447043	1	550	0.011788	0.00921218	0.015084
Two-dose	165	446492	1	583	0.012012	0.00940461	0.0153421
Two-dose	166	445908	0	538	0.012012	0.00940461	0.0153421
Two-dose	167	445370	0	583	0.012012	0.00940461	0.0153421
Two-dose	168	444787	0	583	0.012012	0.00940461	0.0153421
Two-dose	169	444204	0	601	0.012012	0.00940461	0.0153421
Two-dose	170	443603	0	544	0.012012	0.00940461	0.0153421
Two-dose	171	443059	0	529	0.012012	0.00940461	0.0153421
Two-dose	172	442530	0	543	0.012012	0.00940461	0.0153421
Two-dose	173	441987	0	527	0.012012	0.00940461	0.0153421
Two-dose	174	441460	0	577	0.012012	0.00940461	0.0153421
Two-dose	175	440883	1	617	0.0122387	0.00959948	0.0156036
Two-dose	176	440265	1	601	0.0124659	0.0097949	0.0158651
Two-dose	177	439663	0	589	0.0124659	0.0097949	0.0158651
Two-dose	178	439074	2	625	0.0129213	0.0101876	0.0163885
Two-dose	179	438447	2	670	0.0133774	0.010582	0.0169112
Two-dose	180	437775	0	629	0.0133774	0.010582	0.0169112
Two-dose	181	437146	1	1076	0.0136061	0.0107802	0.0171729
Two-dose	182	436069	0	1464	0.0136061	0.0107802	0.0171729
Two-dose	183	434605	0	1290	0.0136061	0.0107802	0.0171729
Two-dose	184	433315	1	1432	0.0138369	0.0109801	0.0174368
Two-dose	185	431882	0	1555	0.0138369	0.0109801	0.0174368
Two-dose	186	430327	2	1399	0.0143016	0.0113833	0.0179679
Two-dose	187	428926	1	1280	0.0145347	0.0115859	0.018234
Two-dose	188	427645	2	1362	0.0150023	0.0119929	0.0187668
Two-dose	189	426281	0	1417	0.0150023	0.0119929	0.0187668
Two-dose	190	424864	0	1254	0.0150023	0.0119929	0.0187668
Two-dose	191	423610	0	1229	0.0150023	0.0119929	0.0187668
Two-dose	192	422381	0	1182	0.0150023	0.0119929	0.0187668
Two-dose	193	421199	0	1158	0.0150023	0.0119929	0.0187668
Two-dose	194	420041	0	1112	0.0150023	0.0119929	0.0187668
Two-dose	195	418929	1	1153	0.015241	0.0122005	0.0190391
Two-dose	196	417775	1	1260	0.0154803	0.0124089	0.0193119
Two-dose	197	416514	0	1092	0.0154803	0.0124089	0.0193119
Two-dose	198	415422	0	1041	0.0154803	0.0124089	0.0193119
Two-dose	199	414381	0	1106	0.0154803	0.0124089	0.0193119
Two-dose	200	413275	0	1041	0.0154803	0.0124089	0.0193119
Two-dose	201	412234	0	1158	0.0154803	0.0124089	0.0193119
Two-dose	202	411076	4	1117	0.0164532	0.013257	0.0204199
Two-dose	203	409955	0	1294	0.0164532	0.013257	0.0204199
Two-dose	204	408661	1	1088	0.0166979	0.0134708	0.020698
Two-dose	205	407572	0	1031	0.0166979	0.0134708	0.020698
Two-dose	206	406541	1	1014	0.0169438	0.0136858	0.0209773
Two-dose	207	405526	0	1048	0.0169438	0.0136858	0.0209773
Two-dose	208	404478	0	1031	0.0169438	0.0136858	0.0209773
Two-dose	209	403447	0	1067	0.0169438	0.0136858	0.0209773
Two-dose	210	402380	1	1183	0.0171923	0.013903	0.0212597
Two-dose	211	401196	0	1073	0.0171923	0.013903	0.0212597
Two-dose	212	400123	0	1063	0.0171923	0.013903	0.0212597
Two-dose	213	399060	0	1072	0.0171923	0.013903	0.0212597
Two-dose	214	397988	0	1090	0.0171923	0.013903	0.0212597
Two-dose	215	396898	1	1051	0.0174442	0.0141231	0.0215461
Two-dose	216	395846	0	1080	0.0174442	0.0141231	0.0215461
Two-dose	217	394766	0	1207	0.0174442	0.0141231	0.0215461
Two-dose	218	393559	1	1117	0.0176982	0.0143451	0.021835
Two-dose	219	392441	0	1036	0.0176982	0.0143451	0.021835
Two-dose	220	391405	0	1020	0.0176982	0.0143451	0.021835
Two-dose	221	390385	0	1002	0.0176982	0.0143451	0.021835
Two-dose	222	389383	0	1070	0.0176982	0.0143451	0.021835
Two-dose	223	388313	0	1025	0.0176982	0.0143451	0.021835
Two-dose	224	387288	0	1170	0.0176982	0.0143451	0.021835
Two-dose	225	386118	1	1070	0.0179572	0.0145712	0.0221299
Two-dose	226	385047	0	1062	0.0179572	0.0145712	0.0221299
Two-dose	227	383985	0	916	0.0179572	0.0145712	0.0221299
Two-dose	228	383069	1	947	0.0182182	0.0147991	0.0224271
Two-dose	229	382121	0	954	0.0182182	0.0147991	0.0224271
Two-dose	230	381167	0	1059	0.0182182	0.0147991	0.0224271
Two-dose	231	380108	0	1178	0.0182182	0.0147991	0.0224271
Two-dose	232	378930	0	1098	0.0182182	0.0147991	0.0224271
Two-dose	233	377832	2	1034	0.0187474	0.0152612	0.0230299
Two-dose	234	376796	0	956	0.0187474	0.0152612	0.0230299
Two-dose	235	375840	0	1039	0.0187474	0.0152612	0.0230299
Two-dose	236	374801	1	1029	0.0190142	0.0154943	0.0233335
Two-dose	237	373771	0	1054	0.0190142	0.0154943	0.0233335
Two-dose	238	372717	0	1214	0.0190142	0.0154943	0.0233335
Two-dose	239	371503	0	1127	0.0190142	0.0154943	0.0233335
Two-dose	240	370376	0	1159	0.0190142	0.0154943	0.0233335
Two-dose	241	369217	0	1234	0.0190142	0.0154943	0.0233335
Two-dose	242	367983	0	1319	0.0190142	0.0154943	0.0233335
Two-dose	243	366664	0	1325	0.0190142	0.0154943	0.0233335
Two-dose	244	365339	0	1424	0.0190142	0.0154943	0.0233335
Two-dose	245	363915	1	1766	0.0192889	0.0157338	0.0236471
Two-dose	246	362148	0	1568	0.0192889	0.0157338	0.0236471
Two-dose	247	360580	1	1388	0.0195662	0.0159756	0.0239637
Two-dose	248	359191	0	1342	0.0195662	0.0159756	0.0239637
Two-dose	249	357849	0	1388	0.0195662	0.0159756	0.0239637
Two-dose	250	356461	1	1270	0.0198467	0.0162201	0.024284
Two-dose	251	355190	0	1264	0.0198467	0.0162201	0.024284
Two-dose	252	353926	1	1423	0.0201292	0.0164664	0.0246065
Two-dose	253	352502	0	1381	0.0201292	0.0164664	0.0246065
Two-dose	254	351121	1	1126	0.0204139	0.0167148	0.0249315
Two-dose	255	349994	0	1209	0.0204139	0.0167148	0.0249315
Two-dose	256	348785	1	1165	0.0207005	0.0169649	0.0252586
Two-dose	257	347619	0	1119	0.0207005	0.0169649	0.0252586
Two-dose	258	346500	0	1183	0.0207005	0.0169649	0.0252586
Two-dose	259	345317	1	1197	0.0209901	0.0172176	0.025589
Two-dose	260	344119	0	1126	0.0209901	0.0172176	0.025589
Two-dose	261	342993	1	1148	0.0212816	0.017472	0.0259216
Two-dose	262	341844	0	1028	0.0212816	0.017472	0.0259216
Two-dose	263	340816	1	1018	0.0215749	0.0177282	0.0262562
Two-dose	264	339797	0	1093	0.0215749	0.0177282	0.0262562
Two-dose	265	338704	0	1095	0.0215749	0.0177282	0.0262562
Two-dose	266	337609	0	1147	0.0215749	0.0177282	0.0262562
Two-dose	267	336462	0	1043	0.0215749	0.0177282	0.0262562
Two-dose	268	335419	2	1006	0.0221711	0.0182487	0.0269363
Two-dose	269	334411	0	943	0.0221711	0.0182487	0.0269363
Two-dose	270	333468	0	1055	0.0221711	0.0182487	0.0269363
Two-dose	271	332413	0	955	0.0221711	0.0182487	0.0269363
Two-dose	272	331458	0	1072	0.0221711	0.0182487	0.0269363
Two-dose	273	330386	0	1077	0.0221711	0.0182487	0.0269363
Two-dose	274	329309	0	1059	0.0221711	0.0182487	0.0269363
Two-dose	275	328250	0	1003	0.0221711	0.0182487	0.0269363
Two-dose	276	327247	1	1019	0.0224766	0.0185151	0.0272855
Two-dose	277	326227	0	959	0.0224766	0.0185151	0.0272855
Two-dose	278	325268	0	981	0.0224766	0.0185151	0.0272855
Two-dose	279	324287	0	1021	0.0224766	0.0185151	0.0272855
Two-dose	280	323266	0	1015	0.0224766	0.0185151	0.0272855
Two-dose	281	322251	2	1024	0.0230971	0.0190562	0.0279947
Two-dose	282	321225	0	950	0.0230971	0.0190562	0.0279947
Two-dose	283	320275	0	933	0.0230971	0.0190562	0.0279947
Two-dose	284	319342	0	871	0.0230971	0.0190562	0.0279947
Two-dose	285	318471	0	847	0.0230971	0.0190562	0.0279947
Two-dose	286	317624	1	855	0.0234118	0.0193307	0.0283545
Two-dose	287	316768	0	947	0.0234118	0.0193307	0.0283545
Two-dose	288	315821	0	835	0.0234118	0.0193307	0.0283545
Two-dose	289	314986	0	727	0.0234118	0.0193307	0.0283545
Two-dose	290	314259	0	707	0.0234118	0.0193307	0.0283545
Two-dose	291	313552	0	712	0.0234118	0.0193307	0.0283545
Two-dose	292	312840	0	751	0.0234118	0.0193307	0.0283545
Two-dose	293	312089	0	720	0.0234118	0.0193307	0.0283545
Two-dose	294	311369	0	762	0.0234118	0.0193307	0.0283545
Two-dose	295	310607	0	682	0.0234118	0.0193307	0.0283545
Two-dose	296	309925	0	590	0.0234118	0.0193307	0.0283545
Two-dose	297	309335	0	620	0.0234118	0.0193307	0.0283545
Two-dose	298	308715	0	583	0.0234118	0.0193307	0.0283545
Two-dose	299	308132	0	598	0.0234118	0.0193307	0.0283545
Two-dose	300	307534	0	612	0.0234118	0.0193307	0.0283545
Two-dose	301	306922	0	661	0.0234118	0.0193307	0.0283545
Two-dose	302	306261	0	600	0.0234118	0.0193307	0.0283545
Two-dose	303	305661	0	555	0.0234118	0.0193307	0.0283545
Two-dose	304	305106	0	499	0.0234118	0.0193307	0.0283545
Two-dose	305	304607	0	534	0.0234118	0.0193307	0.0283545
Two-dose	306	304073	0	476	0.0234118	0.0193307	0.0283545
Two-dose	307	303597	1	446	0.0237411	0.0196165	0.0287329
Two-dose	308	303150	0	493	0.0237411	0.0196165	0.0287329
Two-dose	309	302657	1	490	0.0240715	0.0199035	0.0291121
Two-dose	310	302166	0	402	0.0240715	0.0199035	0.0291121
Two-dose	311	301764	1	406	0.0244028	0.0201917	0.029492
Two-dose	312	301357	0	399	0.0244028	0.0201917	0.029492
Two-dose	313	300958	1	417	0.024735	0.0204809	0.0298725
Two-dose	314	300540	0	403	0.024735	0.0204809	0.0298725
Two-dose	315	300137	0	457	0.024735	0.0204809	0.0298725
Two-dose	316	299680	0	400	0.024735	0.0204809	0.0298725
Two-dose	317	299280	1	324	0.025069	0.0207719	0.030255
Two-dose	318	298955	1	341	0.0254034	0.0210635	0.0306374
Two-dose	319	298613	0	380	0.0254034	0.0210635	0.0306374
Two-dose	320	298233	0	324	0.0254034	0.0210635	0.0306374
Two-dose	321	297909	0	363	0.0254034	0.0210635	0.0306374
Two-dose	322	297546	0	359	0.0254034	0.0210635	0.0306374
Two-dose	323	297187	0	342	0.0254034	0.0210635	0.0306374
Two-dose	324	296845	0	312	0.0254034	0.0210635	0.0306374
Two-dose	325	296533	0	324	0.0254034	0.0210635	0.0306374
Two-dose	326	296209	0	293	0.0254034	0.0210635	0.0306374
Two-dose	327	295916	1	296	0.0257413	0.0213581	0.0310238
Two-dose	328	295619	0	306	0.0257413	0.0213581	0.0310238
Two-dose	329	295313	0	355	0.0257413	0.0213581	0.0310238
Two-dose	330	294958	0	331	0.0257413	0.0213581	0.0310238
Two-dose	331	294627	1	245	0.0260806	0.0216542	0.0314117
Two-dose	332	294381	0	268	0.0260806	0.0216542	0.0314117
Two-dose	333	294113	1	288	0.0264205	0.0219511	0.0317997
Two-dose	334	293824	0	294	0.0264205	0.0219511	0.0317997
Two-dose	335	293530	0	281	0.0264205	0.0219511	0.0317997
Two-dose	336	293249	0	285	0.0264205	0.0219511	0.0317997
Two-dose	337	292964	0	265	0.0264205	0.0219511	0.0317997
Two-dose	338	292699	1	225	0.0267621	0.0222497	0.0321895
Two-dose	339	292473	0	269	0.0267621	0.0222497	0.0321895
Two-dose	340	292204	3	257	0.0277885	0.0231487	0.033358
Two-dose	341	291944	0	247	0.0277885	0.0231487	0.033358
Two-dose	342	291697	0	259	0.0277885	0.0231487	0.033358
Two-dose	343	291438	0	258	0.0277885	0.0231487	0.033358
Two-dose	344	291180	1	234	0.0281318	0.02345	0.0337482
Two-dose	345	290945	0	238	0.0281318	0.02345	0.0337482
Two-dose	346	290707	0	213	0.0281318	0.02345	0.0337482
Two-dose	347	290494	0	182	0.0281318	0.02345	0.0337482
Two-dose	348	290312	0	236	0.0281318	0.02345	0.0337482
Two-dose	349	290076	0	200	0.0281318	0.02345	0.0337482
Two-dose	350	289876	1	233	0.0284767	0.0237528	0.0341399
Two-dose	351	289642	0	207	0.0284767	0.0237528	0.0341399
Two-dose	352	289435	1	195	0.0288221	0.0240564	0.0345318
Two-dose	353	289239	1	199	0.0291677	0.0243604	0.0349236
Two-dose	354	289039	1	172	0.0295136	0.0246649	0.0353153
Two-dose	355	288866	1	191	0.0298597	0.0249699	0.0357068
Two-dose	356	288674	0	196	0.0298597	0.0249699	0.0357068
Two-dose	357	288478	0	231	0.0298597	0.0249699	0.0357068
Two-dose	358	288247	1	186	0.0302065	0.0252758	0.0360989
Two-dose	359	288060	0	189	0.0302065	0.0252758	0.0360989
Two-dose	360	287871	1	169	0.0305538	0.0255823	0.0364912
Two-dose	361	287701	0	175	0.0305538	0.0255823	0.0364912
Two-dose	362	287526	0	174	0.0305538	0.0255823	0.0364912
Two-dose	363	287352	0	212	0.0305538	0.0255823	0.0364912
Two-dose	364	287140	0	195	0.0305538	0.0255823	0.0364912
Two-dose	365	286945	0	181	0.0305538	0.0255823	0.0364912
Two-dose	366	286764	0	153	0.0305538	0.0255823	0.0364912
Two-dose	367	286611	0	158	0.0305538	0.0255823	0.0364912
Two-dose	368	286453	0	145	0.0305538	0.0255823	0.0364912
Two-dose	369	286308	0	163	0.0305538	0.0255823	0.0364912
Two-dose	370	286145	0	172	0.0305538	0.0255823	0.0364912
Two-dose	371	285973	0	173	0.0305538	0.0255823	0.0364912
Two-dose	372	285800	1	150	0.0309036	0.0258911	0.0368862
Two-dose	373	285649	0	159	0.0309036	0.0258911	0.0368862
Two-dose	374	285490	0	132	0.0309036	0.0258911	0.0368862
Two-dose	375	285358	0	122	0.0309036	0.0258911	0.0368862
Two-dose	376	285236	0	138	0.0309036	0.0258911	0.0368862
Two-dose	377	285098	0	142	0.0309036	0.0258911	0.0368862
Two-dose	378	284956	0	149	0.0309036	0.0258911	0.0368862
Two-dose	379	284807	0	129	0.0309036	0.0258911	0.0368862
Two-dose	380	284678	0	128	0.0309036	0.0258911	0.0368862
Two-dose	381	284550	0	123	0.0309036	0.0258911	0.0368862
Two-dose	382	284427	0	136	0.0309036	0.0258911	0.0368862
Two-dose	383	284291	0	115	0.0309036	0.0258911	0.0368862
Two-dose	384	284176	0	147	0.0309036	0.0258911	0.0368862
Two-dose	385	284029	0	144	0.0309036	0.0258911	0.0368862
Two-dose	386	283885	0	124	0.0309036	0.0258911	0.0368862
Two-dose	387	283761	0	111	0.0309036	0.0258911	0.0368862
Two-dose	388	283650	0	126	0.0309036	0.0258911	0.0368862
Two-dose	389	283524	0	130	0.0309036	0.0258911	0.0368862
Two-dose	390	283394	0	98	0.0309036	0.0258911	0.0368862
Two-dose	391	283296	0	120	0.0309036	0.0258911	0.0368862
Two-dose	392	283176	0	115	0.0309036	0.0258911	0.0368862
Two-dose	393	283061	0	101	0.0309036	0.0258911	0.0368862
Two-dose	394	282960	0	110	0.0309036	0.0258911	0.0368862
Two-dose	395	282850	0	117	0.0309036	0.0258911	0.0368862
Two-dose	396	282733	0	111	0.0309036	0.0258911	0.0368862
Two-dose	397	282622	0	94	0.0309036	0.0258911	0.0368862
Two-dose	398	282528	0	112	0.0309036	0.0258911	0.0368862
Two-dose	399	282416	0	115	0.0309036	0.0258911	0.0368862
Two-dose	400	282301	1	116	0.0312577	0.0262036	0.0372865
Two-dose	401	282184	0	102	0.0312577	0.0262036	0.0372865
Two-dose	402	282082	0	102	0.0312577	0.0262036	0.0372865
Two-dose	403	281980	0	119	0.0312577	0.0262036	0.0372865
Two-dose	404	281861	0	99	0.0312577	0.0262036	0.0372865
Two-dose	405	281762	1	108	0.0316125	0.0265169	0.0376871
Two-dose	406	281653	0	103	0.0316125	0.0265169	0.0376871
Two-dose	407	281550	1	107	0.0319676	0.0268306	0.0380878
Two-dose	408	281442	0	107	0.0319676	0.0268306	0.0380878
Two-dose	409	281335	0	81	0.0319676	0.0268306	0.0380878
Two-dose	410	281254	0	95	0.0319676	0.0268306	0.0380878
Two-dose	411	281159	0	108	0.0319676	0.0268306	0.0380878
Two-dose	412	281051	1	94	0.0323232	0.0271452	0.0384888
Two-dose	413	280956	0	84	0.0323232	0.0271452	0.0384888
Two-dose	414	280872	0	92	0.0323232	0.0271452	0.0384888
Two-dose	415	280780	0	75	0.0323232	0.0271452	0.0384888
Two-dose	416	280705	0	77	0.0323232	0.0271452	0.0384888
Two-dose	417	280628	0	87	0.0323232	0.0271452	0.0384888
Two-dose	418	280541	0	88	0.0323232	0.0271452	0.0384888
Two-dose	419	280453	0	85	0.0323232	0.0271452	0.0384888
Two-dose	420	280368	0	92	0.0323232	0.0271452	0.0384888
Two-dose	421	280276	0	89	0.0323232	0.0271452	0.0384888
Two-dose	422	280187	0	80	0.0323232	0.0271452	0.0384888
Two-dose	423	280107	0	80	0.0323232	0.0271452	0.0384888
Two-dose	424	280027	0	95	0.0323232	0.0271452	0.0384888
Two-dose	425	279932	0	87	0.0323232	0.0271452	0.0384888
Two-dose	426	279845	1	75	0.0326805	0.0274613	0.0388914
Two-dose	427	279769	0	93	0.0326805	0.0274613	0.0388914
Two-dose	428	279676	1	92	0.0330379	0.0277778	0.0392939
Two-dose	429	279583	0	69	0.0330379	0.0277778	0.0392939
Two-dose	430	279514	0	84	0.0330379	0.0277778	0.0392939
Two-dose	431	279430	0	85	0.0330379	0.0277778	0.0392939
Two-dose	432	279345	0	85	0.0330379	0.0277778	0.0392939
Two-dose	433	279260	0	84	0.0330379	0.0277778	0.0392939
Two-dose	434	279176	0	71	0.0330379	0.0277778	0.0392939
Two-dose	435	279105	0	81	0.0330379	0.0277778	0.0392939
Two-dose	436	279024	1	61	0.0333962	0.0280952	0.0396971
Two-dose	437	278962	0	76	0.0333962	0.0280952	0.0396971
Two-dose	438	278886	0	51	0.0333962	0.0280952	0.0396971
Two-dose	439	278835	0	76	0.0333962	0.0280952	0.0396971
Two-dose	440	278759	0	80	0.0333962	0.0280952	0.0396971
Two-dose	441	278679	0	74	0.0333962	0.0280952	0.0396971
Two-dose	442	278605	0	89	0.0333962	0.0280952	0.0396971
Two-dose	443	278516	0	67	0.0333962	0.0280952	0.0396971
Two-dose	444	278449	0	77	0.0333962	0.0280952	0.0396971
Two-dose	445	278372	0	73	0.0333962	0.0280952	0.0396971
Two-dose	446	278299	1	54	0.0337554	0.0284137	0.0401011
Two-dose	447	278244	0	72	0.0337554	0.0284137	0.0401011
Two-dose	448	278172	0	74	0.0337554	0.0284137	0.0401011
Two-dose	449	278098	0	68	0.0337554	0.0284137	0.0401011
Two-dose	450	278030	1	81	0.0341149	0.0287327	0.0405052
Two-dose	451	277948	0	51	0.0341149	0.0287327	0.0405052
Two-dose	452	277897	0	57	0.0341149	0.0287327	0.0405052
Two-dose	453	277840	0	59	0.0341149	0.0287327	0.0405052
Two-dose	454	277781	0	57	0.0341149	0.0287327	0.0405052
Two-dose	455	277724	2	72	0.0348348	0.0293721	0.0413133
Two-dose	456	277650	0	65	0.0348348	0.0293721	0.0413133
Two-dose	457	277585	0	74	0.0348348	0.0293721	0.0413133
Two-dose	458	277511	0	60	0.0348348	0.0293721	0.0413133
Two-dose	459	277451	0	74	0.0348348	0.0293721	0.0413133
Two-dose	460	277377	0	57	0.0348348	0.0293721	0.0413133
Two-dose	461	277320	1	53	0.0351953	0.0296926	0.0417175
Two-dose	462	277266	0	67	0.0351953	0.0296926	0.0417175
Two-dose	463	277199	1	53	0.0355559	0.0300135	0.0421216
Two-dose	464	277145	0	62	0.0355559	0.0300135	0.0421216
Two-dose	465	277083	0	59	0.0355559	0.0300135	0.0421216
Two-dose	466	277024	0	55	0.0355559	0.0300135	0.0421216
Two-dose	467	276969	0	70	0.0355559	0.0300135	0.0421216
Two-dose	468	276899	0	49	0.0355559	0.0300135	0.0421216
Two-dose	469	276850	0	65	0.0355559	0.0300135	0.0421216
Two-dose	470	276785	0	59	0.0355559	0.0300135	0.0421216
Two-dose	471	276726	0	56	0.0355559	0.0300135	0.0421216
Two-dose	472	276670	0	49	0.0355559	0.0300135	0.0421216
Two-dose	473	276621	0	54	0.0355559	0.0300135	0.0421216
Two-dose	474	276567	0	46	0.0355559	0.0300135	0.0421216
Two-dose	475	276521	0	40	0.0355559	0.0300135	0.0421216
Two-dose	476	276481	1	52	0.0359175	0.0303354	0.0425265
Two-dose	477	276428	0	39	0.0359175	0.0303354	0.0425265
Two-dose	478	276389	0	43	0.0359175	0.0303354	0.0425265
Two-dose	479	276346	0	40	0.0359175	0.0303354	0.0425265
Two-dose	480	276306	0	54	0.0359175	0.0303354	0.0425265
Two-dose	481	276252	1	58	0.0362793	0.0306578	0.0429315
Two-dose	482	276193	0	51	0.0362793	0.0306578	0.0429315
Two-dose	483	276142	0	63	0.0362793	0.0306578	0.0429315
Two-dose	484	276079	1	49	0.0366414	0.0309806	0.0433364
Two-dose	485	276029	0	52	0.0366414	0.0309806	0.0433364
Two-dose	486	275977	0	46	0.0366414	0.0309806	0.0433364
Two-dose	487	275931	0	39	0.0366414	0.0309806	0.0433364
Two-dose	488	275892	1	59	0.0370038	0.0313038	0.0437414
Two-dose	489	275832	0	53	0.0370038	0.0313038	0.0437414
Two-dose	490	275779	0	55	0.0370038	0.0313038	0.0437414
Two-dose	491	275724	0	49	0.0370038	0.0313038	0.0437414
Two-dose	492	275675	0	71	0.0370038	0.0313038	0.0437414
Two-dose	493	275604	0	52	0.0370038	0.0313038	0.0437414
Two-dose	494	275552	0	43	0.0370038	0.0313038	0.0437414
Two-dose	495	275509	0	75	0.0370038	0.0313038	0.0437414
Two-dose	496	275434	0	40	0.0370038	0.0313038	0.0437414
Two-dose	497	275394	1	49	0.0373667	0.0316278	0.0441468
Two-dose	498	275344	0	42	0.0373667	0.0316278	0.0441468
Two-dose	499	275302	0	36	0.0373667	0.0316278	0.0441468
Two-dose	500	275266	0	27	0.0373667	0.0316278	0.0441468
Two-dose	501	275239	0	35	0.0373667	0.0316278	0.0441468
Two-dose	502	275204	0	47	0.0373667	0.0316278	0.0441468
Two-dose	503	275157	0	74	0.0373667	0.0316278	0.0441468
Two-dose	504	275083	0	51	0.0373667	0.0316278	0.0441468
Two-dose	505	275032	0	57	0.0373667	0.0316278	0.0441468
Two-dose	506	274975	0	51	0.0373667	0.0316278	0.0441468
Two-dose	507	274924	0	30	0.0373667	0.0316278	0.0441468
Two-dose	508	274894	0	37	0.0373667	0.0316278	0.0441468
Two-dose	509	274857	0	52	0.0373667	0.0316278	0.0441468
Two-dose	510	274805	0	53	0.0373667	0.0316278	0.0441468
Two-dose	511	274752	0	60	0.0373667	0.0316278	0.0441468
Two-dose	512	274692	0	50	0.0373667	0.0316278	0.0441468
Two-dose	513	274642	0	54	0.0373667	0.0316278	0.0441468
Two-dose	514	274588	0	32	0.0373667	0.0316278	0.0441468
Two-dose	515	274556	1	36	0.0377308	0.0319529	0.0445534
Two-dose	516	274519	1	54	0.038095	0.0322783	0.0449596
Two-dose	517	274464	0	50	0.038095	0.0322783	0.0449596
Two-dose	518	274414	0	59	0.038095	0.0322783	0.0449596
Two-dose	519	274355	0	49	0.038095	0.0322783	0.0449596
Two-dose	520	274306	0	43	0.038095	0.0322783	0.0449596
Two-dose	521	274263	0	28	0.038095	0.0322783	0.0449596
Two-dose	522	274235	1	30	0.0384595	0.0326042	0.0453661
Two-dose	523	274204	0	67	0.0384595	0.0326042	0.0453661
Two-dose	524	274137	0	61	0.0384595	0.0326042	0.0453661
Two-dose	525	274076	0	52	0.0384595	0.0326042	0.0453661
Two-dose	526	274024	0	48	0.0384595	0.0326042	0.0453661
Two-dose	527	273976	0	50	0.0384595	0.0326042	0.0453661
Two-dose	528	273926	0	38	0.0384595	0.0326042	0.0453661
Two-dose	529	273888	0	20	0.0384595	0.0326042	0.0453661
Two-dose	530	273868	0	57	0.0384595	0.0326042	0.0453661
Two-dose	531	273811	1	55	0.0388246	0.0329307	0.045773
Two-dose	532	273755	0	49	0.0388246	0.0329307	0.045773
Two-dose	533	273706	0	48	0.0388246	0.0329307	0.045773
Two-dose	534	273658	0	71	0.0388246	0.0329307	0.045773
Two-dose	535	273587	0	31	0.0388246	0.0329307	0.045773
Two-dose	536	273556	0	30	0.0388246	0.0329307	0.045773
Two-dose	537	273526	0	56	0.0388246	0.0329307	0.045773
Two-dose	538	273470	0	70	0.0388246	0.0329307	0.045773
Two-dose	539	273400	0	49	0.0388246	0.0329307	0.045773
Two-dose	540	273351	0	52	0.0388246	0.0329307	0.045773
Two-dose	541	273299	0	62	0.0388246	0.0329307	0.045773
Two-dose	542	273237	0	40	0.0388246	0.0329307	0.045773
Two-dose	543	273197	0	28	0.0388246	0.0329307	0.045773
Two-dose	544	273169	0	64	0.0388246	0.0329307	0.045773
Two-dose	545	273105	1	55	0.0391906	0.0332583	0.0461807
Two-dose	546	273049	0	33	0.0391906	0.0332583	0.0461807
Two-dose	547	273016	1	61	0.0395567	0.0335862	0.0465884
Two-dose	548	272954	0	74	0.0395567	0.0335862	0.0465884
Two-dose	549	272880	0	22	0.0395567	0.0335862	0.0465884
Two-dose	550	272858	0	26	0.0395567	0.0335862	0.0465884
Two-dose	551	272832	0	68	0.0395567	0.0335862	0.0465884
Two-dose	552	272764	0	69	0.0395567	0.0335862	0.0465884
Two-dose	553	272695	0	56	0.0395567	0.0335862	0.0465884
Two-dose	554	272639	0	66	0.0395567	0.0335862	0.0465884
Two-dose	555	272573	0	87	0.0395567	0.0335862	0.0465884
Two-dose	556	272486	0	26	0.0395567	0.0335862	0.0465884
Two-dose	557	272460	0	29	0.0395567	0.0335862	0.0465884
Two-dose	558	272431	0	78	0.0395567	0.0335862	0.0465884
Two-dose	559	272353	0	90	0.0395567	0.0335862	0.0465884
Two-dose	560	272263	0	65	0.0395567	0.0335862	0.0465884
Two-dose	561	272198	1	71	0.0399239	0.0339151	0.0469971
Two-dose	562	272126	0	55	0.0399239	0.0339151	0.0469971
Two-dose	563	272071	1	20	0.0402913	0.0342444	0.0474057
Two-dose	564	272050	0	21	0.0402913	0.0342444	0.0474057
Two-dose	565	272029	0	69	0.0402913	0.0342444	0.0474057
Two-dose	566	271960	3	71	0.041394	0.035234	0.0486307
Two-dose	567	271886	0	42	0.041394	0.035234	0.0486307
Two-dose	568	271844	0	87	0.041394	0.035234	0.0486307
Two-dose	569	271757	0	78	0.041394	0.035234	0.0486307
Two-dose	570	271679	0	24	0.041394	0.035234	0.0486307
Two-dose	571	271655	0	26	0.041394	0.035234	0.0486307
Two-dose	572	271629	1	68	0.041762	0.0355647	0.049039
Two-dose	573	271560	0	58	0.041762	0.0355647	0.049039
Two-dose	574	271502	0	44	0.041762	0.0355647	0.049039
Two-dose	575	271458	0	91	0.041762	0.0355647	0.049039
Two-dose	576	271367	0	102	0.041762	0.0355647	0.049039
Two-dose	577	271265	0	23	0.041762	0.0355647	0.049039
Two-dose	578	271242	1	21	0.0421305	0.0358959	0.0494477
Two-dose	579	271220	0	85	0.0421305	0.0358959	0.0494477
Two-dose	580	271135	0	71	0.0421305	0.0358959	0.0494477
Two-dose	581	271064	1	50	0.0424993	0.0362276	0.0498565
Two-dose	582	271013	1	72	0.0428681	0.0365594	0.0502651
Two-dose	583	270940	0	92	0.0428681	0.0365594	0.0502651
Two-dose	584	270848	0	32	0.0428681	0.0365594	0.0502651
Two-dose	585	270816	0	20	0.0428681	0.0365594	0.0502651
Two-dose	586	270796	0	83	0.0428681	0.0365594	0.0502651
Two-dose	587	270713	0	81	0.0428681	0.0365594	0.0502651
Two-dose	588	270632	0	77	0.0428681	0.0365594	0.0502651
Two-dose	589	270555	1	67	0.0432376	0.036892	0.0506743
Two-dose	590	270487	1	93	0.0436071	0.0372249	0.0510833
Two-dose	591	270393	1	20	0.0439768	0.037558	0.0514922
Two-dose	592	270372	0	20	0.0439768	0.037558	0.0514922
Two-dose	593	270352	0	87	0.0439768	0.037558	0.0514922
Two-dose	594	270265	0	72	0.0439768	0.037558	0.0514922
Two-dose	595	270193	0	68	0.0439768	0.037558	0.0514922
Two-dose	596	270125	0	82	0.0439768	0.037558	0.0514922
Two-dose	597	270043	0	108	0.0439768	0.037558	0.0514922
Two-dose	598	269935	0	31	0.0439768	0.037558	0.0514922
Two-dose	599	269904	0	19	0.0439768	0.037558	0.0514922
Two-dose	600	269885	0	134	0.0439768	0.037558	0.0514922
Two-dose	601	269751	0	95	0.0439768	0.037558	0.0514922
Two-dose	602	269656	0	67	0.0439768	0.037558	0.0514922
Two-dose	603	269589	0	104	0.0439768	0.037558	0.0514922
Two-dose	604	269485	0	89	0.0439768	0.037558	0.0514922
Two-dose	605	269396	0	21	0.0439768	0.037558	0.0514922
Two-dose	606	269375	0	26	0.0439768	0.037558	0.0514922
Two-dose	607	269349	0	69	0.0439768	0.037558	0.0514922
Two-dose	608	269280	0	56	0.0439768	0.037558	0.0514922
Two-dose	609	269224	0	38	0.0439768	0.037558	0.0514922
Two-dose	610	269186	0	36	0.0439768	0.037558	0.0514922
Two-dose	611	269150	1	53	0.0443482	0.0378928	0.051903
Two-dose	612	269096	0	23	0.0443482	0.0378928	0.051903
Two-dose	613	269073	1	20	0.0447196	0.0382277	0.0523137
Two-dose	614	269052	0	99	0.0447196	0.0382277	0.0523137
Two-dose	615	268953	0	63	0.0447196	0.0382277	0.0523137
Two-dose	616	268890	0	69	0.0447196	0.0382277	0.0523137
Two-dose	617	268821	0	83	0.0447196	0.0382277	0.0523137
Two-dose	618	268738	0	106	0.0447196	0.0382277	0.0523137
Two-dose	619	268632	0	25	0.0447196	0.0382277	0.0523137
Two-dose	620	268607	0	17	0.0447196	0.0382277	0.0523137
Two-dose	621	268590	0	86	0.0447196	0.0382277	0.0523137
Two-dose	622	268504	0	77	0.0447196	0.0382277	0.0523137
Two-dose	623	268427	1	81	0.045092	0.0385636	0.0527253
Two-dose	624	268345	1	81	0.0454645	0.0388998	0.0531367
Two-dose	625	268263	2	101	0.0462097	0.0395729	0.0539593
Two-dose	626	268160	0	37	0.0462097	0.0395729	0.0539593
Two-dose	627	268123	1	25	0.0465825	0.0399098	0.0543705
Two-dose	628	268097	0	103	0.0465825	0.0399098	0.0543705
Two-dose	629	267994	0	79	0.0465825	0.0399098	0.0543705
Two-dose	630	267915	0	98	0.0465825	0.0399098	0.0543705
Two-dose	631	267817	0	86	0.0465825	0.0399098	0.0543705
Two-dose	632	267731	0	119	0.0465825	0.0399098	0.0543705
Two-dose	633	267612	0	27	0.0465825	0.0399098	0.0543705
Two-dose	634	267585	0	12	0.0465825	0.0399098	0.0543705
Two-dose	635	267573	0	67	0.0465825	0.0399098	0.0543705
Two-dose	636	267506	0	65	0.0465825	0.0399098	0.0543705
Two-dose	637	267441	0	54	0.0465825	0.0399098	0.0543705
Two-dose	638	267387	1	62	0.0469563	0.0402478	0.0547827
Two-dose	639	267324	0	44	0.0469563	0.0402478	0.0547827
Two-dose	640	267280	0	23	0.0469563	0.0402478	0.0547827
Two-dose	641	267257	0	22	0.0469563	0.0402478	0.0547827
Two-dose	642	267235	0	98	0.0469563	0.0402478	0.0547827
Two-dose	643	267137	0	90	0.0469563	0.0402478	0.0547827
Two-dose	644	267047	0	81	0.0469563	0.0402478	0.0547827
Two-dose	645	266966	0	110	0.0469563	0.0402478	0.0547827
Two-dose	646	266856	0	130	0.0469563	0.0402478	0.0547827
Two-dose	647	266726	1	35	0.047331	0.0405867	0.0551958
Two-dose	648	266690	0	18	0.047331	0.0405867	0.0551958
Two-dose	649	266672	0	145	0.047331	0.0405867	0.0551958
Two-dose	650	266527	0	97	0.047331	0.0405867	0.0551958
Two-dose	651	266430	0	107	0.047331	0.0405867	0.0551958
Two-dose	652	266323	1	105	0.0477063	0.0409262	0.0556094
Two-dose	653	266217	1	127	0.0480818	0.041266	0.056023
Two-dose	654	266089	0	37	0.0480818	0.041266	0.056023
Two-dose	655	266052	2	35	0.0488332	0.0419465	0.0568501
Two-dose	656	266015	0	159	0.0488332	0.0419465	0.0568501
Two-dose	657	265856	0	110	0.0488332	0.0419465	0.0568501
Two-dose	658	265746	0	119	0.0488332	0.0419465	0.0568501
Two-dose	659	265627	1	128	0.0492095	0.0422875	0.0572641
Two-dose	660	265498	0	146	0.0492095	0.0422875	0.0572641
Two-dose	661	265352	0	37	0.0492095	0.0422875	0.0572641
Two-dose	662	265315	0	30	0.0492095	0.0422875	0.0572641
Two-dose	663	265285	0	191	0.0492095	0.0422875	0.0572641
Two-dose	664	265094	0	114	0.0492095	0.0422875	0.0572641
Two-dose	665	264980	1	126	0.0495867	0.0426294	0.057679
Two-dose	666	264853	0	142	0.0495867	0.0426294	0.057679
Two-dose	667	264711	0	168	0.0495867	0.0426294	0.057679
Two-dose	668	264543	0	63	0.0495867	0.0426294	0.057679
Two-dose	669	264480	0	58	0.0495867	0.0426294	0.057679
Two-dose	670	264422	0	163	0.0495867	0.0426294	0.057679
Two-dose	671	264259	0	167	0.0495867	0.0426294	0.057679
Two-dose	672	264092	0	144	0.0495867	0.0426294	0.057679
Two-dose	673	263948	0	105	0.0495867	0.0426294	0.057679
Two-dose	674	263843	0	104	0.0495867	0.0426294	0.057679
Two-dose	675	263739	0	28	0.0495867	0.0426294	0.057679
Two-dose	676	263711	0	20	0.0495867	0.0426294	0.057679
Two-dose	677	263691	0	105	0.0495867	0.0426294	0.057679
Two-dose	678	263586	0	80	0.0495867	0.0426294	0.057679
Two-dose	679	263506	0	51	0.0495867	0.0426294	0.057679
Two-dose	680	263455	0	48	0.0495867	0.0426294	0.057679
Two-dose	681	263407	0	80	0.0495867	0.0426294	0.057679
Two-dose	682	263327	0	33	0.0495867	0.0426294	0.057679
Two-dose	683	263294	0	48	0.0495867	0.0426294	0.057679
Two-dose	684	263246	0	109	0.0495867	0.0426294	0.057679
Two-dose	685	263137	0	77	0.0495867	0.0426294	0.057679
Two-dose	686	263060	0	74	0.0495867	0.0426294	0.057679
Two-dose	687	262986	0	100	0.0495867	0.0426294	0.057679
Two-dose	688	262886	0	95	0.0495867	0.0426294	0.057679
Two-dose	689	262791	1	39	0.049967	0.0429741	0.0580975
Two-dose	690	262751	0	26	0.049967	0.0429741	0.0580975
Two-dose	691	262725	1	123	0.0503474	0.0433189	0.058516
Two-dose	692	262601	1	117	0.050728	0.0436641	0.0589344
Two-dose	693	262483	0	110	0.050728	0.0436641	0.0589344
Two-dose	694	262373	0	101	0.050728	0.0436641	0.0589344
Two-dose	695	262272	0	92	0.050728	0.0436641	0.0589344
Two-dose	696	262180	0	53	0.050728	0.0436641	0.0589344
Two-dose	697	262127	0	46	0.050728	0.0436641	0.0589344
Two-dose	698	262081	0	121	0.050728	0.0436641	0.0589344
Two-dose	699	261960	0	123	0.050728	0.0436641	0.0589344
Two-dose	700	261837	0	121	0.050728	0.0436641	0.0589344
Two-dose	701	261716	0	87	0.050728	0.0436641	0.0589344
Two-dose	702	261629	0	94	0.050728	0.0436641	0.0589344
Two-dose	703	261535	2	50	0.0514924	0.0443576	0.0597745
Two-dose	704	261483	0	50	0.0514924	0.0443576	0.0597745
Two-dose	705	261433	0	56	0.0514924	0.0443576	0.0597745
Two-dose	706	261377	1	52	0.0518748	0.0447047	0.0601945
Two-dose	707	261324	0	57	0.0518748	0.0447047	0.0601945
Two-dose	708	261267	0	37	0.0518748	0.0447047	0.0601945
Two-dose	709	261230	0	48	0.0518748	0.0447047	0.0601945
Two-dose	710	261182	0	28	0.0518748	0.0447047	0.0601945
Two-dose	711	261154	1	45	0.0522575	0.0450523	0.0606147
Two-dose	712	261108	0	133	0.0522575	0.0450523	0.0606147
Two-dose	713	260975	1	111	0.0526405	0.0454002	0.061035
Two-dose	714	260863	0	110	0.0526405	0.0454002	0.061035
Two-dose	715	260753	1	135	0.0530238	0.0457486	0.0614556
Two-dose	716	260617	1	142	0.0534073	0.0460972	0.0618762
Two-dose	717	260474	0	35	0.0534073	0.0460972	0.0618762
Two-dose	718	260439	0	46	0.0534073	0.0460972	0.0618762
Two-dose	719	260393	0	145	0.0534073	0.0460972	0.0618762
Two-dose	720	260248	0	84	0.0534073	0.0460972	0.0618762
Two-dose	721	260164	0	112	0.0534073	0.0460972	0.0618762
Two-dose	722	260052	0	122	0.0534073	0.0460972	0.0618762
Two-dose	723	259930	1	167	0.0537918	0.0464469	0.0622978
Two-dose	724	259762	1	51	0.0541765	0.0467969	0.0627196
Two-dose	725	259710	0	45	0.0541765	0.0467969	0.0627196
Two-dose	726	259665	0	159	0.0541765	0.0467969	0.0627196
Two-dose	727	259506	0	123	0.0541765	0.0467969	0.0627196
Two-dose	728	259383	1	120	0.0545619	0.0471475	0.0631418
Two-dose	729	259262	0	142	0.0545619	0.0471475	0.0631418
Two-dose	730	259120	0	105	0.0545619	0.0471475	0.0631418
Two-dose	731	259015	0	42	0.0545619	0.0471475	0.0631418
Two-dose	732	258973	0	44	0.0545619	0.0471475	0.0631418
Two-dose	733	258929	1	135	0.0549479	0.0474988	0.0635647
Two-dose	734	258793	0	95	0.0549479	0.0474988	0.0635647
Two-dose	735	258698	0	86	0.0549479	0.0474988	0.0635647
Two-dose	736	258612	0	107	0.0549479	0.0474988	0.0635647
Two-dose	737	258505	0	94	0.0549479	0.0474988	0.0635647
Two-dose	738	258411	0	40	0.0549479	0.0474988	0.0635647
Two-dose	739	258371	0	32	0.0549479	0.0474988	0.0635647
Two-dose	740	258339	0	128	0.0549479	0.0474988	0.0635647
Two-dose	741	258211	0	126	0.0549479	0.0474988	0.0635647
Two-dose	742	258085	0	155	0.0549479	0.0474988	0.0635647
Two-dose	743	257930	0	171	0.0549479	0.0474988	0.0635647
Two-dose	744	257759	0	160	0.0549479	0.0474988	0.0635647
Two-dose	745	257599	0	68	0.0549479	0.0474988	0.0635647
Two-dose	746	257531	0	44	0.0549479	0.0474988	0.0635647
Two-dose	747	257487	0	157	0.0549479	0.0474988	0.0635647
Two-dose	748	257330	0	172	0.0549479	0.0474988	0.0635647
Two-dose	749	257158	0	143	0.0549479	0.0474988	0.0635647
Two-dose	750	257015	1	180	0.0553367	0.0478527	0.0639909
Two-dose	751	256834	0	159	0.0553367	0.0478527	0.0639909
Two-dose	752	256675	0	72	0.0553367	0.0478527	0.0639909
Two-dose	753	256603	1	65	0.0557262	0.0482072	0.0644176
Two-dose	754	256537	0	193	0.0557262	0.0482072	0.0644176
Two-dose	755	256344	1	148	0.0561161	0.0485622	0.0648446
Two-dose	756	256195	1	165	0.0565062	0.0489175	0.0652718
Two-dose	757	256029	1	197	0.0568966	0.0492732	0.065699
Two-dose	758	255831	0	223	0.0568966	0.0492732	0.065699
Two-dose	759	255608	0	95	0.0568966	0.0492732	0.065699
Two-dose	760	255513	0	78	0.0568966	0.0492732	0.065699
Two-dose	761	255435	0	204	0.0568966	0.0492732	0.065699
Two-dose	762	255231	0	204	0.0568966	0.0492732	0.065699
Two-dose	763	255027	0	141	0.0568966	0.0492732	0.065699
Two-dose	764	254886	1	187	0.0572887	0.0496305	0.0661282
Two-dose	765	254698	0	233	0.0572887	0.0496305	0.0661282
Two-dose	766	254465	0	82	0.0572887	0.0496305	0.0661282
Two-dose	767	254383	0	70	0.0572887	0.0496305	0.0661282
Two-dose	768	254313	0	208	0.0572887	0.0496305	0.0661282
Two-dose	769	254105	0	187	0.0572887	0.0496305	0.0661282
Two-dose	770	253918	1	160	0.0576823	0.0499891	0.066559
Two-dose	771	253757	1	220	0.0580761	0.0503481	0.0669899
Two-dose	772	253536	0	281	0.0580761	0.0503481	0.0669899
Two-dose	773	253255	0	114	0.0580761	0.0503481	0.0669899
Two-dose	774	253141	0	94	0.0580761	0.0503481	0.0669899
Two-dose	775	253047	0	282	0.0580761	0.0503481	0.0669899
Two-dose	776	252765	0	223	0.0580761	0.0503481	0.0669899
Two-dose	777	252542	0	254	0.0580761	0.0503481	0.0669899
Two-dose	778	252288	0	289	0.0580761	0.0503481	0.0669899
Two-dose	779	251999	0	294	0.0580761	0.0503481	0.0669899
Two-dose	780	251705	0	158	0.0580761	0.0503481	0.0669899
Two-dose	781	251547	0	112	0.0580761	0.0503481	0.0669899
Two-dose	782	251435	0	298	0.0580761	0.0503481	0.0669899
Two-dose	783	251137	1	317	0.0584741	0.0507107	0.0674256
Two-dose	784	250819	0	312	0.0584741	0.0507107	0.0674256
Two-dose	785	250507	0	361	0.0584741	0.0507107	0.0674256
Two-dose	786	250146	0	363	0.0584741	0.0507107	0.0674256
Two-dose	787	249783	0	127	0.0584741	0.0507107	0.0674256
Two-dose	788	249656	0	128	0.0584741	0.0507107	0.0674256
Two-dose	789	249528	0	319	0.0584741	0.0507107	0.0674256
Two-dose	790	249209	0	333	0.0584741	0.0507107	0.0674256
Two-dose	791	248876	0	219	0.0584741	0.0507107	0.0674256
Two-dose	792	248657	0	314	0.0584741	0.0507107	0.0674256
Two-dose	793	248343	0	279	0.0584741	0.0507107	0.0674256
Two-dose	794	248064	1	141	0.058877	0.0510775	0.067867
Two-dose	795	247922	0	138	0.058877	0.0510775	0.067867
Two-dose	796	247784	1	286	0.0592803	0.0514448	0.0683088
Two-dose	797	247497	0	327	0.0592803	0.0514448	0.0683088
Two-dose	798	247170	0	273	0.0592803	0.0514448	0.0683088
Two-dose	799	246897	0	302	0.0592803	0.0514448	0.0683088
Two-dose	800	246595	0	352	0.0592803	0.0514448	0.0683088
Two-dose	801	246243	0	167	0.0592803	0.0514448	0.0683088
Two-dose	802	246076	0	162	0.0592803	0.0514448	0.0683088
Two-dose	803	245914	0	291	0.0592803	0.0514448	0.0683088
Two-dose	804	245623	0	299	0.0592803	0.0514448	0.0683088
Two-dose	805	245324	0	301	0.0592803	0.0514448	0.0683088
Two-dose	806	245023	2	300	0.0600961	0.0521875	0.0692027
Two-dose	807	244721	0	292	0.0600961	0.0521875	0.0692027
Two-dose	808	244429	0	155	0.0600961	0.0521875	0.0692027
Two-dose	809	244274	1	122	0.0605052	0.0525601	0.0696509
Two-dose	810	244151	0	272	0.0605052	0.0525601	0.0696509
Two-dose	811	243879	0	250	0.0605052	0.0525601	0.0696509
Two-dose	812	243629	0	288	0.0605052	0.0525601	0.0696509
Two-dose	813	243341	0	288	0.0605052	0.0525601	0.0696509
Two-dose	814	243053	0	235	0.0605052	0.0525601	0.0696509
Two-dose	815	242818	0	90	0.0605052	0.0525601	0.0696509
Two-dose	816	242728	0	117	0.0605052	0.0525601	0.0696509
Two-dose	817	242611	0	249	0.0605052	0.0525601	0.0696509
Two-dose	818	242362	0	268	0.0605052	0.0525601	0.0696509
Two-dose	819	242094	0	211	0.0605052	0.0525601	0.0696509
Two-dose	820	241883	0	270	0.0605052	0.0525601	0.0696509
Two-dose	821	241613	0	213	0.0605052	0.0525601	0.0696509
Two-dose	822	241400	0	114	0.0605052	0.0525601	0.0696509
Two-dose	823	241286	0	105	0.0605052	0.0525601	0.0696509
Two-dose	824	241181	0	230	0.0605052	0.0525601	0.0696509
Two-dose	825	240951	0	243	0.0605052	0.0525601	0.0696509
Two-dose	826	240708	0	245	0.0605052	0.0525601	0.0696509
Two-dose	827	240463	0	243	0.0605052	0.0525601	0.0696509
Two-dose	828	240220	0	249	0.0605052	0.0525601	0.0696509
Two-dose	829	239971	0	104	0.0605052	0.0525601	0.0696509
Two-dose	830	239867	0	137	0.0605052	0.0525601	0.0696509
Two-dose	831	239730	0	317	0.0605052	0.0525601	0.0696509
Two-dose	832	239413	0	268	0.0605052	0.0525601	0.0696509
Two-dose	833	239145	0	146	0.0605052	0.0525601	0.0696509
Two-dose	834	238999	1	201	0.0609234	0.0529404	0.0701097
Two-dose	835	238797	0	241	0.0609234	0.0529404	0.0701097
Two-dose	836	238556	0	105	0.0609234	0.0529404	0.0701097
Two-dose	837	238451	0	94	0.0609234	0.0529404	0.0701097
Two-dose	838	238357	0	242	0.0609234	0.0529404	0.0701097
Two-dose	839	238115	1	257	0.0613431	0.053322	0.0705703
Two-dose	840	237857	0	235	0.0613431	0.053322	0.0705703
Two-dose	841	237622	0	292	0.0613431	0.053322	0.0705703
Two-dose	842	237330	0	209	0.0613431	0.053322	0.0705703
Two-dose	843	237121	0	114	0.0613431	0.053322	0.0705703
Two-dose	844	237007	0	105	0.0613431	0.053322	0.0705703
Two-dose	845	236902	0	318	0.0613431	0.053322	0.0705703
Two-dose	846	236584	0	275	0.0613431	0.053322	0.0705703
Two-dose	847	236309	0	291	0.0613431	0.053322	0.0705703
Two-dose	848	236018	0	341	0.0613431	0.053322	0.0705703
Two-dose	849	235677	0	402	0.0613431	0.053322	0.0705703
Two-dose	850	235275	0	146	0.0613431	0.053322	0.0705703
Two-dose	851	235129	0	139	0.0613431	0.053322	0.0705703
Two-dose	852	234990	1	443	0.0617684	0.0537085	0.0710373
Two-dose	853	234546	0	348	0.0617684	0.0537085	0.0710373
Two-dose	854	234198	0	385	0.0617684	0.0537085	0.0710373
Two-dose	855	233813	0	345	0.0617684	0.0537085	0.0710373
Two-dose	856	233468	0	355	0.0617684	0.0537085	0.0710373
Two-dose	857	233113	0	176	0.0617684	0.0537085	0.0710373
Two-dose	858	232937	1	183	0.0621974	0.0540982	0.0715087
Two-dose	859	232753	0	354	0.0621974	0.0540982	0.0715087
Two-dose	860	232399	0	352	0.0621974	0.0540982	0.0715087
Two-dose	861	232047	0	337	0.0621974	0.0540982	0.0715087
Two-dose	862	231710	1	387	0.0626287	0.05449	0.0719826
Two-dose	863	231322	0	467	0.0626287	0.05449	0.0719826
Two-dose	864	230855	0	158	0.0626287	0.05449	0.0719826
Two-dose	865	230697	0	157	0.0626287	0.05449	0.0719826
Two-dose	866	230540	0	381	0.0626287	0.05449	0.0719826
Two-dose	867	230159	0	396	0.0626287	0.05449	0.0719826
Two-dose	868	229763	0	375	0.0626287	0.05449	0.0719826
Two-dose	869	229388	0	388	0.0626287	0.05449	0.0719826
Two-dose	870	229000	0	430	0.0626287	0.05449	0.0719826
Two-dose	871	228570	0	203	0.0626287	0.05449	0.0719826
Two-dose	872	228367	0	236	0.0626287	0.05449	0.0719826
Two-dose	873	228131	0	488	0.0626287	0.05449	0.0719826
Two-dose	874	227643	1	490	0.0630677	0.0548883	0.0724655
Two-dose	875	227152	0	460	0.0630677	0.0548883	0.0724655
Two-dose	876	226692	0	513	0.0630677	0.0548883	0.0724655
Two-dose	877	226179	1	577	0.0635096	0.0552892	0.0729517
Two-dose	878	225601	0	269	0.0635096	0.0552892	0.0729517
Two-dose	879	225332	0	221	0.0635096	0.0552892	0.0729517
Two-dose	880	225111	2	613	0.0643975	0.0560948	0.0739285
Two-dose	881	224496	1	505	0.0648426	0.0564989	0.074418
Two-dose	882	223990	1	515	0.0652888	0.0569041	0.0749085
Two-dose	883	223474	0	546	0.0652888	0.0569041	0.0749085
Two-dose	884	222928	1	554	0.0657371	0.0573111	0.0754013
Two-dose	885	222373	0	328	0.0657371	0.0573111	0.0754013
Two-dose	886	222045	0	369	0.0657371	0.0573111	0.0754013
Two-dose	887	221676	1	699	0.0661879	0.0577204	0.0758969
Two-dose	888	220976	0	515	0.0661879	0.0577204	0.0758969
Two-dose	889	220461	1	567	0.0666412	0.058132	0.0763954
Two-dose	890	219893	0	661	0.0666412	0.058132	0.0763954
Two-dose	891	219232	0	612	0.0666412	0.058132	0.0763954
Two-dose	892	218620	0	349	0.0666412	0.058132	0.0763954
Two-dose	893	218271	0	239	0.0666412	0.058132	0.0763954
Two-dose	894	218032	0	691	0.0666412	0.058132	0.0763954
Two-dose	895	217341	1	551	0.067101	0.0585491	0.0769014
Two-dose	896	216789	0	470	0.067101	0.0585491	0.0769014
Two-dose	897	216319	0	652	0.067101	0.0585491	0.0769014
Two-dose	898	215667	0	652	0.067101	0.0585491	0.0769014
Two-dose	899	215015	0	339	0.067101	0.0585491	0.0769014
Two-dose	900	214676	0	249	0.067101	0.0585491	0.0769014
Two-dose	901	214427	0	526	0.067101	0.0585491	0.0769014
Two-dose	902	213901	0	372	0.067101	0.0585491	0.0769014
Two-dose	903	213529	0	415	0.067101	0.0585491	0.0769014
Two-dose	904	213114	0	462	0.067101	0.0585491	0.0769014
Two-dose	905	212652	0	440	0.067101	0.0585491	0.0769014
Two-dose	906	212212	1	264	0.0675719	0.0589755	0.0774207
Two-dose	907	211947	0	310	0.0675719	0.0589755	0.0774207
Two-dose	908	211637	0	488	0.0675719	0.0589755	0.0774207
Two-dose	909	211149	0	449	0.0675719	0.0589755	0.0774207
Two-dose	910	210700	0	452	0.0675719	0.0589755	0.0774207
Two-dose	911	210248	0	445	0.0675719	0.0589755	0.0774207
Two-dose	912	209803	0	546	0.0675719	0.0589755	0.0774207
Two-dose	913	209257	0	290	0.0675719	0.0589755	0.0774207
Two-dose	914	208967	0	260	0.0675719	0.0589755	0.0774207
Two-dose	915	208707	0	602	0.0675719	0.0589755	0.0774207
Two-dose	916	208105	0	463	0.0675719	0.0589755	0.0774207
Two-dose	917	207642	0	540	0.0675719	0.0589755	0.0774207
Two-dose	918	207102	0	487	0.0675719	0.0589755	0.0774207
Two-dose	919	206615	0	648	0.0675719	0.0589755	0.0774207
Two-dose	920	205967	0	406	0.0675719	0.0589755	0.0774207
Two-dose	921	205561	0	361	0.0675719	0.0589755	0.0774207
Two-dose	922	205200	0	582	0.0675719	0.0589755	0.0774207
Two-dose	923	204618	0	530	0.0675719	0.0589755	0.0774207
Two-dose	924	204088	0	543	0.0675719	0.0589755	0.0774207
Two-dose	925	203545	0	570	0.0675719	0.0589755	0.0774207
Two-dose	926	202975	0	632	0.0675719	0.0589755	0.0774207
Two-dose	927	202343	0	431	0.0675719	0.0589755	0.0774207
Two-dose	928	201912	1	420	0.0680668	0.0594218	0.0779691
Two-dose	929	201491	0	1132	0.0680668	0.0594218	0.0779691
Two-dose	930	200359	0	1238	0.0680668	0.0594218	0.0779691
Two-dose	931	199121	0	858	0.0680668	0.0594218	0.0779691
Two-dose	932	198263	0	1483	0.0680668	0.0594218	0.0779691
Two-dose	933	196780	0	1354	0.0680668	0.0594218	0.0779691
Two-dose	934	195426	0	1285	0.0680668	0.0594218	0.0779691
Two-dose	935	194141	0	434	0.0680668	0.0594218	0.0779691
Two-dose	936	193707	0	2482	0.0680668	0.0594218	0.0779691
Two-dose	937	191225	0	1841	0.0680668	0.0594218	0.0779691
Two-dose	938	189384	0	1377	0.0680668	0.0594218	0.0779691
Two-dose	939	188007	0	1697	0.0680668	0.0594218	0.0779691
Two-dose	940	186310	0	3851	0.0680668	0.0594218	0.0779691
Two-dose	941	182459	0	1613	0.0680668	0.0594218	0.0779691
Two-dose	942	180846	0	385	0.0680668	0.0594218	0.0779691
Two-dose	943	180461	0	2708	0.0680668	0.0594218	0.0779691
Two-dose	944	177753	0	1787	0.0680668	0.0594218	0.0779691
Two-dose	945	175966	0	1970	0.0680668	0.0594218	0.0779691
Two-dose	946	173996	0	2002	0.0680668	0.0594218	0.0779691
Two-dose	947	171994	0	793	0.0680668	0.0594218	0.0779691
Two-dose	948	171201	0	1774	0.0680668	0.0594218	0.0779691
Two-dose	949	169427	0	445	0.0680668	0.0594218	0.0779691
Two-dose	950	168982	0	3799	0.0680668	0.0594218	0.0779691
Two-dose	951	165183	0	3358	0.0680668	0.0594218	0.0779691
Two-dose	952	161825	0	1993	0.0680668	0.0594218	0.0779691
Two-dose	953	159832	0	3166	0.0680668	0.0594218	0.0779691
Two-dose	954	156666	0	2413	0.0680668	0.0594218	0.0779691
Two-dose	955	154253	0	2588	0.0680668	0.0594218	0.0779691
Two-dose	956	151665	0	420	0.0680668	0.0594218	0.0779691
Two-dose	957	151245	0	3390	0.0680668	0.0594218	0.0779691
Two-dose	958	147855	1	1891	0.0687427	0.0600096	0.0787462
Two-dose	959	145963	0	3374	0.0687427	0.0600096	0.0787462
Two-dose	960	142589	0	2662	0.0687427	0.0600096	0.0787462
Two-dose	961	139927	1	1524	0.0694568	0.0606267	0.0795725
Two-dose	962	138402	0	2360	0.0694568	0.0606267	0.0795725
Two-dose	963	136042	0	241	0.0694568	0.0606267	0.0795725
Two-dose	964	135801	0	2363	0.0694568	0.0606267	0.0795725
Two-dose	965	133438	0	1883	0.0694568	0.0606267	0.0795725
Two-dose	966	131555	0	665	0.0694568	0.0606267	0.0795725
Two-dose	967	130890	0	2348	0.0694568	0.0606267	0.0795725
Two-dose	968	128542	0	4900	0.0694568	0.0606267	0.0795725
Two-dose	969	123642	0	436	0.0694568	0.0606267	0.0795725
Two-dose	970	123206	0	350	0.0694568	0.0606267	0.0795725
Two-dose	971	122856	0	2033	0.0694568	0.0606267	0.0795725
Two-dose	972	120823	0	2300	0.0694568	0.0606267	0.0795725
Two-dose	973	118523	0	2363	0.0694568	0.0606267	0.0795725
Two-dose	974	116160	0	2267	0.0694568	0.0606267	0.0795725
Two-dose	975	113893	0	631	0.0694568	0.0606267	0.0795725
Two-dose	976	113262	0	262	0.0694568	0.0606267	0.0795725
Two-dose	977	113000	0	207	0.0694568	0.0606267	0.0795725
Two-dose	978	112793	0	585	0.0694568	0.0606267	0.0795725
Two-dose	979	112208	0	3834	0.0694568	0.0606267	0.0795725
Two-dose	980	108374	0	388	0.0694568	0.0606267	0.0795725
Two-dose	981	107986	0	2181	0.0694568	0.0606267	0.0795725
Two-dose	982	105805	0	2362	0.0694568	0.0606267	0.0795725
Two-dose	983	103443	0	1740	0.0694568	0.0606267	0.0795725
Two-dose	984	101703	0	252	0.0694568	0.0606267	0.0795725
Two-dose	985	101451	0	822	0.0694568	0.0606267	0.0795725
Two-dose	986	100629	0	792	0.0694568	0.0606267	0.0795725
Two-dose	987	99837	1	933	0.0704578	0.0614433	0.0807942
Two-dose	988	98903	0	1113	0.0704578	0.0614433	0.0807942
Two-dose	989	97790	0	996	0.0704578	0.0614433	0.0807942
Two-dose	990	96794	0	776	0.0704578	0.0614433	0.0807942
Two-dose	991	96018	0	416	0.0704578	0.0614433	0.0807942
Two-dose	992	95602	0	1809	0.0704578	0.0614433	0.0807942
Two-dose	993	93793	0	2191	0.0704578	0.0614433	0.0807942
Two-dose	994	91602	0	465	0.0704578	0.0614433	0.0807942
Two-dose	995	91137	0	1519	0.0704578	0.0614433	0.0807942
Two-dose	996	89618	0	1476	0.0704578	0.0614433	0.0807942
Two-dose	997	88142	0	1478	0.0704578	0.0614433	0.0807942
Two-dose	998	86664	0	344	0.0704578	0.0614433	0.0807942
Two-dose	999	86320	0	1442	0.0704578	0.0614433	0.0807942
[truncated: 1 more rows]

## Sheet: Figure 1B
Cohort	time	at_risk	fail	net_lost	CumulativeIncidence	lb100	ub100
Two-Dose	1	330568	3	4338	0.000907529	0.000292698	0.00281383
Two-Dose	2	326227	1	3674	0.00121406	0.000455653	0.00323477
Two-Dose	3	322552	2	3486	0.00183411	0.000823957	0.00408266
Two-Dose	4	319064	3	3214	0.00277434	0.00144344	0.00533236
Two-Dose	5	315847	1	2925	0.00309094	0.00166297	0.00574505
Two-Dose	6	312921	0	2884	0.00309094	0.00166297	0.00574505
Two-Dose	7	310037	2	2797	0.00373601	0.00212145	0.00657931
Two-Dose	8	307238	2	2488	0.00438694	0.00259776	0.00740837
Two-Dose	9	304748	2	2322	0.00504319	0.00308904	0.0082335
Two-Dose	10	302424	0	2323	0.00504319	0.00308904	0.0082335
Two-Dose	11	300101	1	2107	0.0053764	0.00334159	0.00865022
Two-Dose	12	297993	3	1921	0.00638308	0.00411701	0.00989636
Two-Dose	13	296069	1	2095	0.00672082	0.00438083	0.0103106
Two-Dose	14	293973	0	2171	0.00672082	0.00438083	0.0103106
Two-Dose	15	291802	1	1904	0.00706349	0.00464958	0.0107306
Two-Dose	16	289897	1	1718	0.00740842	0.00492151	0.0111519
Two-Dose	17	288178	0	1696	0.00740842	0.00492151	0.0111519
Two-Dose	18	286482	1	1627	0.00775745	0.00519774	0.0115777
Two-Dose	19	284854	0	1621	0.00775745	0.00519774	0.0115777
Two-Dose	20	283233	1	1658	0.00811049	0.00547818	0.0120076
Two-Dose	21	281574	0	1709	0.00811049	0.00547818	0.0120076
Two-Dose	22	279865	1	1546	0.00846778	0.00576295	0.012442
Two-Dose	23	278318	0	1410	0.00846778	0.00576295	0.012442
Two-Dose	24	276908	0	1432	0.00846778	0.00576295	0.012442
Two-Dose	25	275476	0	1430	0.00846778	0.00576295	0.012442
Two-Dose	26	274046	0	1317	0.00846778	0.00576295	0.012442
Two-Dose	27	272729	0	1346	0.00846778	0.00576295	0.012442
Two-Dose	28	271383	2	1416	0.00920468	0.00635171	0.013339
Two-Dose	29	269965	0	1340	0.00920468	0.00635171	0.013339
Two-Dose	30	268625	0	1211	0.00920468	0.00635171	0.013339
Two-Dose	31	267414	1	1236	0.0095786	0.00665194	0.0137928
Two-Dose	32	266177	1	1177	0.00995425	0.00695476	0.0142473
Two-Dose	33	264999	1	1183	0.0103316	0.00726008	0.0147024
Two-Dose	34	263815	0	1200	0.0103316	0.00726008	0.0147024
Two-Dose	35	262615	2	1296	0.0110931	0.00787925	0.0156177
Two-Dose	36	261317	0	1192	0.0110931	0.00787925	0.0156177
Two-Dose	37	260125	1	1098	0.0114775	0.00819318	0.0160781
Two-Dose	38	259026	0	1140	0.0114775	0.00819318	0.0160781
Two-Dose	39	257886	2	1055	0.0122529	0.00882916	0.0170042
Two-Dose	40	256829	1	1091	0.0126422	0.00914994	0.0174673
Two-Dose	41	255737	0	1089	0.0126422	0.00914994	0.0174673
Two-Dose	42	254648	0	1069	0.0126422	0.00914994	0.0174673
Two-Dose	43	253579	0	1011	0.0126422	0.00914994	0.0174673
Two-Dose	44	252568	0	937	0.0126422	0.00914994	0.0174673
Two-Dose	45	251631	0	907	0.0126422	0.00914994	0.0174673
Two-Dose	46	250724	0	851	0.0126422	0.00914994	0.0174673
Two-Dose	47	249873	0	860	0.0126422	0.00914994	0.0174673
Two-Dose	48	249013	0	893	0.0126422	0.00914994	0.0174673
Two-Dose	49	248120	0	919	0.0126422	0.00914994	0.0174673
Two-Dose	50	247201	0	824	0.0126422	0.00914994	0.0174673
Two-Dose	51	246377	0	821	0.0126422	0.00914994	0.0174673
Two-Dose	52	245556	0	742	0.0126422	0.00914994	0.0174673
Two-Dose	53	244814	0	735	0.0126422	0.00914994	0.0174673
Two-Dose	54	244079	0	701	0.0126422	0.00914994	0.0174673
Two-Dose	55	243378	0	734	0.0126422	0.00914994	0.0174673
Two-Dose	56	242644	0	714	0.0126422	0.00914994	0.0174673
Two-Dose	57	241930	0	663	0.0126422	0.00914994	0.0174673
Two-Dose	58	241267	0	575	0.0126422	0.00914994	0.0174673
Two-Dose	59	240692	0	590	0.0126422	0.00914994	0.0174673
Two-Dose	60	240102	0	561	0.0126422	0.00914994	0.0174673
Two-Dose	61	239541	0	578	0.0126422	0.00914994	0.0174673
Two-Dose	62	238963	0	548	0.0126422	0.00914994	0.0174673
Two-Dose	63	238415	1	571	0.0130616	0.00949246	0.0179726
Two-Dose	64	237843	2	487	0.0139024	0.0101827	0.0189807
Two-Dose	65	237354	1	473	0.0143236	0.0105303	0.0194834
Two-Dose	66	236880	0	491	0.0143236	0.0105303	0.0194834
Two-Dose	67	236389	0	454	0.0143236	0.0105303	0.0194834
Two-Dose	68	235935	1	422	0.0147474	0.0108807	0.0199881
Two-Dose	69	235512	0	429	0.0147474	0.0108807	0.0199881
Two-Dose	70	235083	0	475	0.0147474	0.0108807	0.0199881
Two-Dose	71	234608	0	431	0.0147474	0.0108807	0.0199881
Two-Dose	72	234177	1	421	0.0151744	0.0112345	0.0204959
Two-Dose	73	233755	0	378	0.0151744	0.0112345	0.0204959
Two-Dose	74	233377	1	411	0.0156028	0.0115904	0.0210042
Two-Dose	75	232965	0	391	0.0156028	0.0115904	0.0210042
Two-Dose	76	232574	2	342	0.0164626	0.0123073	0.0220207
Two-Dose	77	232230	1	425	0.0168932	0.0126677	0.0225278
Two-Dose	78	231804	0	328	0.0168932	0.0126677	0.0225278
Two-Dose	79	231476	0	303	0.0168932	0.0126677	0.0225278
Two-Dose	80	231173	0	322	0.0168932	0.0126677	0.0225278
Two-Dose	81	230851	0	286	0.0168932	0.0126677	0.0225278
Two-Dose	82	230565	1	300	0.0173268	0.0130313	0.023038
Two-Dose	83	230264	0	340	0.0173268	0.0130313	0.023038
Two-Dose	84	229924	1	338	0.0177617	0.0133967	0.0235487
Two-Dose	85	229585	0	303	0.0177617	0.0133967	0.0235487
Two-Dose	86	229282	1	286	0.0181977	0.0137638	0.0240598
Two-Dose	87	228995	0	273	0.0181977	0.0137638	0.0240598
Two-Dose	88	228722	0	272	0.0181977	0.0137638	0.0240598
Two-Dose	89	228450	0	272	0.0181977	0.0137638	0.0240598
Two-Dose	90	228178	0	285	0.0181977	0.0137638	0.0240598
Two-Dose	91	227893	0	293	0.0181977	0.0137638	0.0240598
Two-Dose	92	227600	0	235	0.0181977	0.0137638	0.0240598
Two-Dose	93	227365	0	238	0.0181977	0.0137638	0.0240598
Two-Dose	94	227127	0	261	0.0181977	0.0137638	0.0240598
Two-Dose	95	226866	0	229	0.0181977	0.0137638	0.0240598
Two-Dose	96	226637	0	222	0.0181977	0.0137638	0.0240598
Two-Dose	97	226415	0	230	0.0181977	0.0137638	0.0240598
Two-Dose	98	226185	1	227	0.0186398	0.0141361	0.024578
Two-Dose	99	225957	0	240	0.0186398	0.0141361	0.024578
Two-Dose	100	225717	0	206	0.0186398	0.0141361	0.024578
Two-Dose	101	225511	0	199	0.0186398	0.0141361	0.024578
Two-Dose	102	225312	0	206	0.0186398	0.0141361	0.024578
Two-Dose	103	225106	0	178	0.0186398	0.0141361	0.024578
Two-Dose	104	224928	1	200	0.0190843	0.0145111	0.0250985
Two-Dose	105	224727	0	243	0.0190843	0.0145111	0.0250985
Two-Dose	106	224484	0	187	0.0190843	0.0145111	0.0250985
Two-Dose	107	224297	0	190	0.0190843	0.0145111	0.0250985
Two-Dose	108	224107	0	176	0.0190843	0.0145111	0.0250985
Two-Dose	109	223931	1	195	0.0195307	0.0148883	0.0256205
Two-Dose	110	223735	0	178	0.0195307	0.0148883	0.0256205
Two-Dose	111	223557	1	163	0.019978	0.015267	0.0261425
Two-Dose	112	223393	0	183	0.019978	0.015267	0.0261425
Two-Dose	113	223210	0	176	0.019978	0.015267	0.0261425
Two-Dose	114	223034	0	173	0.019978	0.015267	0.0261425
Two-Dose	115	222861	0	192	0.019978	0.015267	0.0261425
Two-Dose	116	222669	0	184	0.019978	0.015267	0.0261425
Two-Dose	117	222485	1	174	0.0204273	0.015648	0.0266662
Two-Dose	118	222310	0	153	0.0204273	0.015648	0.0266662
Two-Dose	119	222157	0	168	0.0204273	0.015648	0.0266662
Two-Dose	120	221989	1	161	0.0208777	0.0160306	0.0271903
Two-Dose	121	221827	1	155	0.0213284	0.0164141	0.0277138
Two-Dose	122	221671	0	146	0.0213284	0.0164141	0.0277138
Two-Dose	123	221525	0	158	0.0213284	0.0164141	0.0277138
Two-Dose	124	221367	1	154	0.0217801	0.0167992	0.0282376
Two-Dose	125	221212	0	187	0.0217801	0.0167992	0.0282376
Two-Dose	126	221025	0	152	0.0217801	0.0167992	0.0282376
Two-Dose	127	220873	0	158	0.0217801	0.0167992	0.0282376
Two-Dose	128	220715	0	142	0.0217801	0.0167992	0.0282376
Two-Dose	129	220573	0	149	0.0217801	0.0167992	0.0282376
Two-Dose	130	220424	0	150	0.0217801	0.0167992	0.0282376
Two-Dose	131	220274	0	153	0.0217801	0.0167992	0.0282376
Two-Dose	132	220121	0	154	0.0217801	0.0167992	0.0282376
Two-Dose	133	219967	0	183	0.0217801	0.0167992	0.0282376
Two-Dose	134	219784	0	136	0.0217801	0.0167992	0.0282376
Two-Dose	135	219648	0	122	0.0217801	0.0167992	0.0282376
Two-Dose	136	219526	0	135	0.0217801	0.0167992	0.0282376
Two-Dose	137	219391	1	146	0.0222358	0.0171879	0.0287659
Two-Dose	138	219244	0	152	0.0222358	0.0171879	0.0287659
Two-Dose	139	219092	0	143	0.0222358	0.0171879	0.0287659
Two-Dose	140	218949	0	131	0.0222358	0.0171879	0.0287659
Two-Dose	141	218818	2	132	0.0231496	0.0179694	0.0298229
Two-Dose	142	218684	0	142	0.0231496	0.0179694	0.0298229
Two-Dose	143	218542	0	130	0.0231496	0.0179694	0.0298229
Two-Dose	144	218412	0	134	0.0231496	0.0179694	0.0298229
Two-Dose	145	218278	0	132	0.0231496	0.0179694	0.0298229
Two-Dose	146	218146	0	141	0.0231496	0.0179694	0.0298229
Two-Dose	147	218005	0	151	0.0231496	0.0179694	0.0298229
Two-Dose	148	217854	1	130	0.0236085	0.0183627	0.0303527
Two-Dose	149	217723	1	149	0.0240677	0.0187568	0.0308821
Two-Dose	150	217573	0	140	0.0240677	0.0187568	0.0308821
Two-Dose	151	217433	1	125	0.0245275	0.0191521	0.0314113
Two-Dose	152	217307	0	143	0.0245275	0.0191521	0.0314113
Two-Dose	153	217164	0	138	0.0245275	0.0191521	0.0314113
Two-Dose	154	217026	0	147	0.0245275	0.0191521	0.0314113
Two-Dose	155	216879	0	136	0.0245275	0.0191521	0.0314113
Two-Dose	156	216743	1	109	0.0249888	0.0195491	0.0319417
Two-Dose	157	216633	0	120	0.0249888	0.0195491	0.0319417
Two-Dose	158	216513	1	122	0.0254505	0.0199472	0.0324719
Two-Dose	159	216390	0	128	0.0254505	0.0199472	0.0324719
Two-Dose	160	216262	0	129	0.0254505	0.0199472	0.0324719
Two-Dose	161	216133	0	115	0.0254505	0.0199472	0.0324719
Two-Dose	162	216018	0	123	0.0254505	0.0199472	0.0324719
Two-Dose	163	215895	0	128	0.0254505	0.0199472	0.0324719
Two-Dose	164	215767	1	108	0.0259138	0.020347	0.0330035
Two-Dose	165	215658	1	128	0.0263774	0.0207476	0.0335346
Two-Dose	166	215529	0	125	0.0263774	0.0207476	0.0335346
Two-Dose	167	215404	1	110	0.0268415	0.0211493	0.0340656
Two-Dose	168	215293	0	140	0.0268415	0.0211493	0.0340656
Two-Dose	169	215153	0	104	0.0268415	0.0211493	0.0340656
Two-Dose	170	215049	2	109	0.0277713	0.0219554	0.0351276
Two-Dose	171	214938	0	132	0.0277713	0.0219554	0.0351276
Two-Dose	172	214806	1	107	0.0282367	0.0223597	0.0356582
Two-Dose	173	214698	0	126	0.0282367	0.0223597	0.0356582
Two-Dose	174	214572	0	131	0.0282367	0.0223597	0.0356582
Two-Dose	175	214441	0	104	0.0282367	0.0223597	0.0356582
Two-Dose	176	214337	0	114	0.0282367	0.0223597	0.0356582
Two-Dose	177	214223	0	109	0.0282367	0.0223597	0.0356582
Two-Dose	178	214114	1	110	0.0287036	0.0227657	0.0361901
Two-Dose	179	214003	1	111	0.0291708	0.0231724	0.0367216
Two-Dose	180	213891	0	110	0.0291708	0.0231724	0.0367216
Two-Dose	181	213781	0	109	0.0291708	0.0231724	0.0367216
Two-Dose	182	213672	0	109	0.0291708	0.0231724	0.0367216
Two-Dose	183	213563	0	99	0.0291708	0.0231724	0.0367216
Two-Dose	184	213464	0	95	0.0291708	0.0231724	0.0367216
Two-Dose	185	213369	0	120	0.0291708	0.0231724	0.0367216
Two-Dose	186	213249	0	116	0.0291708	0.0231724	0.0367216
Two-Dose	187	213133	0	105	0.0291708	0.0231724	0.0367216
Two-Dose	188	213028	1	100	0.0296401	0.0235812	0.0372553
Two-Dose	189	212927	1	99	0.0301096	0.0239908	0.0377887
Two-Dose	190	212827	0	123	0.0301096	0.0239908	0.0377887
Two-Dose	191	212704	0	87	0.0301096	0.0239908	0.0377887
Two-Dose	192	212617	0	102	0.0301096	0.0239908	0.0377887
Two-Dose	193	212515	0	104	0.0301096	0.0239908	0.0377887
Two-Dose	194	212411	0	107	0.0301096	0.0239908	0.0377887
Two-Dose	195	212304	0	100	0.0301096	0.0239908	0.0377887
Two-Dose	196	212204	0	108	0.0301096	0.0239908	0.0377887
Two-Dose	197	212096	0	92	0.0301096	0.0239908	0.0377887
Two-Dose	198	212004	0	90	0.0301096	0.0239908	0.0377887
Two-Dose	199	211914	0	88	0.0301096	0.0239908	0.0377887
Two-Dose	200	211826	0	97	0.0301096	0.0239908	0.0377887
Two-Dose	201	211729	0	105	0.0301096	0.0239908	0.0377887
Two-Dose	202	211624	0	106	0.0301096	0.0239908	0.0377887
Two-Dose	203	211518	0	113	0.0301096	0.0239908	0.0377887
Two-Dose	204	211405	0	91	0.0301096	0.0239908	0.0377887
Two-Dose	205	211314	0	88	0.0301096	0.0239908	0.0377887
Two-Dose	206	211226	0	98	0.0301096	0.0239908	0.0377887
Two-Dose	207	211128	0	84	0.0301096	0.0239908	0.0377887
Two-Dose	208	211044	0	90	0.0301096	0.0239908	0.0377887
Two-Dose	209	210954	0	97	0.0301096	0.0239908	0.0377887
Two-Dose	210	210857	0	92	0.0301096	0.0239908	0.0377887
Two-Dose	211	210765	0	109	0.0301096	0.0239908	0.0377887
Two-Dose	212	210656	0	90	0.0301096	0.0239908	0.0377887
Two-Dose	213	210566	0	82	0.0301096	0.0239908	0.0377887
Two-Dose	214	210484	0	89	0.0301096	0.0239908	0.0377887
Two-Dose	215	210395	0	78	0.0301096	0.0239908	0.0377887
Two-Dose	216	210317	0	72	0.0301096	0.0239908	0.0377887
Two-Dose	217	210245	0	90	0.0301096	0.0239908	0.0377887
Two-Dose	218	210155	0	80	0.0301096	0.0239908	0.0377887
Two-Dose	219	210075	1	69	0.0305854	0.0244057	0.0383297
Two-Dose	220	210005	0	75	0.0305854	0.0244057	0.0383297
Two-Dose	221	209930	0	69	0.0305854	0.0244057	0.0383297
Two-Dose	222	209861	0	81	0.0305854	0.0244057	0.0383297
Two-Dose	223	209780	0	80	0.0305854	0.0244057	0.0383297
Two-Dose	224	209700	0	79	0.0305854	0.0244057	0.0383297
Two-Dose	225	209621	0	85	0.0305854	0.0244057	0.0383297
Two-Dose	226	209536	0	76	0.0305854	0.0244057	0.0383297
Two-Dose	227	209460	0	69	0.0305854	0.0244057	0.0383297
Two-Dose	228	209391	0	76	0.0305854	0.0244057	0.0383297
Two-Dose	229	209315	0	85	0.0305854	0.0244057	0.0383297
Two-Dose	230	209230	0	93	0.0305854	0.0244057	0.0383297
Two-Dose	231	209137	0	80	0.0305854	0.0244057	0.0383297
Two-Dose	232	209057	0	81	0.0305854	0.0244057	0.0383297
Two-Dose	233	208976	0	88	0.0305854	0.0244057	0.0383297
Two-Dose	234	208888	0	76	0.0305854	0.0244057	0.0383297
Two-Dose	235	208812	0	74	0.0305854	0.0244057	0.0383297
Two-Dose	236	208738	1	74	0.0310644	0.0248235	0.038874
Two-Dose	237	208663	1	73	0.0315435	0.0252419	0.0394179
Two-Dose	238	208589	0	91	0.0315435	0.0252419	0.0394179
Two-Dose	239	208498	0	62	0.0315435	0.0252419	0.0394179
Two-Dose	240	208436	0	62	0.0315435	0.0252419	0.0394179
Two-Dose	241	208374	0	70	0.0315435	0.0252419	0.0394179
Two-Dose	242	208304	0	62	0.0315435	0.0252419	0.0394179
Two-Dose	243	208242	0	60	0.0315435	0.0252419	0.0394179
Two-Dose	244	208182	0	78	0.0315435	0.0252419	0.0394179
Two-Dose	245	208104	0	77	0.0315435	0.0252419	0.0394179
Two-Dose	246	208027	0	69	0.0315435	0.0252419	0.0394179
Two-Dose	247	207958	0	68	0.0315435	0.0252419	0.0394179
Two-Dose	248	207890	0	73	0.0315435	0.0252419	0.0394179
Two-Dose	249	207817	0	68	0.0315435	0.0252419	0.0394179
Two-Dose	250	207749	0	64	0.0315435	0.0252419	0.0394179
Two-Dose	251	207685	0	70	0.0315435	0.0252419	0.0394179
Two-Dose	252	207615	0	87	0.0315435	0.0252419	0.0394179
Two-Dose	253	207528	0	69	0.0315435	0.0252419	0.0394179
Two-Dose	254	207459	0	74	0.0315435	0.0252419	0.0394179
Two-Dose	255	207385	0	62	0.0315435	0.0252419	0.0394179
Two-Dose	256	207323	0	68	0.0315435	0.0252419	0.0394179
Two-Dose	257	207255	0	51	0.0315435	0.0252419	0.0394179
Two-Dose	258	207204	0	64	0.0315435	0.0252419	0.0394179
Two-Dose	259	207140	0	64	0.0315435	0.0252419	0.0394179
Two-Dose	260	207076	0	76	0.0315435	0.0252419	0.0394179
Two-Dose	261	207000	0	61	0.0315435	0.0252419	0.0394179
Two-Dose	262	206939	0	51	0.0315435	0.0252419	0.0394179
Two-Dose	263	206888	0	64	0.0315435	0.0252419	0.0394179
Two-Dose	264	206824	0	50	0.0315435	0.0252419	0.0394179
Two-Dose	265	206774	0	46	0.0315435	0.0252419	0.0394179
Two-Dose	266	206728	0	49	0.0315435	0.0252419	0.0394179
Two-Dose	267	206679	0	57	0.0315435	0.0252419	0.0394179
Two-Dose	268	206622	0	60	0.0315435	0.0252419	0.0394179
Two-Dose	269	206562	0	54	0.0315435	0.0252419	0.0394179
Two-Dose	270	206508	0	39	0.0315435	0.0252419	0.0394179
Two-Dose	271	206469	1	55	0.0320276	0.0256647	0.0399678
Two-Dose	272	206413	0	56	0.0320276	0.0256647	0.0399678
Two-Dose	273	206357	0	47	0.0320276	0.0256647	0.0399678
Two-Dose	274	206310	1	58	0.0325122	0.0260883	0.0405176
Two-Dose	275	206251	0	47	0.0325122	0.0260883	0.0405176
Two-Dose	276	206204	0	58	0.0325122	0.0260883	0.0405176
Two-Dose	277	206146	0	42	0.0325122	0.0260883	0.0405176
Two-Dose	278	206104	0	68	0.0325122	0.0260883	0.0405176
Two-Dose	279	206036	0	45	0.0325122	0.0260883	0.0405176
Two-Dose	280	205991	0	54	0.0325122	0.0260883	0.0405176
Two-Dose	281	205937	0	57	0.0325122	0.0260883	0.0405176
Two-Dose	282	205880	0	55	0.0325122	0.0260883	0.0405176
Two-Dose	283	205825	0	47	0.0325122	0.0260883	0.0405176
Two-Dose	284	205778	0	39	0.0325122	0.0260883	0.0405176
Two-Dose	285	205739	1	53	0.0329981	0.0265135	0.0410684
Two-Dose	286	205685	0	40	0.0329981	0.0265135	0.0410684
Two-Dose	287	205645	0	48	0.0329981	0.0265135	0.0410684
Two-Dose	288	205597	0	52	0.0329981	0.0265135	0.0410684
Two-Dose	289	205545	0	55	0.0329981	0.0265135	0.0410684
Two-Dose	290	205490	0	58	0.0329981	0.0265135	0.0410684
Two-Dose	291	205432	0	32	0.0329981	0.0265135	0.0410684
Two-Dose	292	205400	0	46	0.0329981	0.0265135	0.0410684
Two-Dose	293	205354	0	36	0.0329981	0.0265135	0.0410684
Two-Dose	294	205318	0	51	0.0329981	0.0265135	0.0410684
Two-Dose	295	205267	0	33	0.0329981	0.0265135	0.0410684
Two-Dose	296	205234	0	41	0.0329981	0.0265135	0.0410684
Two-Dose	297	205193	0	45	0.0329981	0.0265135	0.0410684
Two-Dose	298	205148	0	42	0.0329981	0.0265135	0.0410684
Two-Dose	299	205106	0	50	0.0329981	0.0265135	0.0410684
Two-Dose	300	205056	0	36	0.0329981	0.0265135	0.0410684
Two-Dose	301	205020	0	51	0.0329981	0.0265135	0.0410684
Two-Dose	302	204969	0	36	0.0329981	0.0265135	0.0410684
Two-Dose	303	204933	0	45	0.0329981	0.0265135	0.0410684
Two-Dose	304	204888	0	35	0.0329981	0.0265135	0.0410684
Two-Dose	305	204853	1	31	0.0334861	0.0269407	0.0416214
Two-Dose	306	204821	0	46	0.0334861	0.0269407	0.0416214
Two-Dose	307	204775	0	46	0.0334861	0.0269407	0.0416214
Two-Dose	308	204729	1	53	0.0339744	0.0273687	0.0421741
Two-Dose	309	204675	0	44	0.0339744	0.0273687	0.0421741
Two-Dose	310	204631	0	37	0.0339744	0.0273687	0.0421741
Two-Dose	311	204594	0	38	0.0339744	0.0273687	0.0421741
Two-Dose	312	204556	0	31	0.0339744	0.0273687	0.0421741
Two-Dose	313	204525	0	40	0.0339744	0.0273687	0.0421741
Two-Dose	314	204485	0	40	0.0339744	0.0273687	0.0421741
Two-Dose	315	204445	0	37	0.0339744	0.0273687	0.0421741
Two-Dose	316	204408	0	32	0.0339744	0.0273687	0.0421741
Two-Dose	317	204376	0	50	0.0339744	0.0273687	0.0421741
Two-Dose	318	204326	0	34	0.0339744	0.0273687	0.0421741
Two-Dose	319	204292	0	33	0.0339744	0.0273687	0.0421741
Two-Dose	320	204259	0	42	0.0339744	0.0273687	0.0421741
Two-Dose	321	204217	0	27	0.0339744	0.0273687	0.0421741
Two-Dose	322	204190	0	45	0.0339744	0.0273687	0.0421741
Two-Dose	323	204145	1	38	0.0344641	0.0277982	0.042728
Two-Dose	324	204106	0	36	0.0344641	0.0277982	0.042728
Two-Dose	325	204070	0	26	0.0344641	0.0277982	0.042728
Two-Dose	326	204044	0	31	0.0344641	0.0277982	0.042728
Two-Dose	327	204013	0	31	0.0344641	0.0277982	0.042728
Two-Dose	328	203982	0	26	0.0344641	0.0277982	0.042728
Two-Dose	329	203956	0	32	0.0344641	0.0277982	0.042728
Two-Dose	330	203924	0	31	0.0344641	0.0277982	0.042728
Two-Dose	331	203893	0	34	0.0344641	0.0277982	0.042728
Two-Dose	332	203859	1	31	0.0349544	0.0282287	0.0432823
Two-Dose	333	203827	0	25	0.0349544	0.0282287	0.0432823
Two-Dose	334	203802	0	35	0.0349544	0.0282287	0.0432823
Two-Dose	335	203767	0	26	0.0349544	0.0282287	0.0432823
Two-Dose	336	203741	0	29	0.0349544	0.0282287	0.0432823
Two-Dose	337	203712	0	32	0.0349544	0.0282287	0.0432823
Two-Dose	338	203680	0	19	0.0349544	0.0282287	0.0432823
Two-Dose	339	203661	0	26	0.0349544	0.0282287	0.0432823
Two-Dose	340	203635	0	33	0.0349544	0.0282287	0.0432823
Two-Dose	341	203602	0	20	0.0349544	0.0282287	0.0432823
Two-Dose	342	203582	0	27	0.0349544	0.0282287	0.0432823
Two-Dose	343	203555	0	38	0.0349544	0.0282287	0.0432823
Two-Dose	344	203517	1	32	0.0354456	0.0286603	0.043837
Two-Dose	345	203484	0	25	0.0354456	0.0286603	0.043837
Two-Dose	346	203459	0	27	0.0354456	0.0286603	0.043837
Two-Dose	347	203432	0	15	0.0354456	0.0286603	0.043837
Two-Dose	348	203417	0	22	0.0354456	0.0286603	0.043837
Two-Dose	349	203395	0	30	0.0354456	0.0286603	0.043837
Two-Dose	350	203365	1	28	0.0359372	0.0290926	0.0443916
Two-Dose	351	203336	0	19	0.0359372	0.0290926	0.0443916
Two-Dose	352	203317	0	17	0.0359372	0.0290926	0.0443916
Two-Dose	353	203300	0	19	0.0359372	0.0290926	0.0443916
Two-Dose	354	203281	1	24	0.0364289	0.0295256	0.044946
Two-Dose	355	203256	0	23	0.0364289	0.0295256	0.044946
Two-Dose	356	203233	0	24	0.0364289	0.0295256	0.044946
Two-Dose	357	203209	0	26	0.0364289	0.0295256	0.044946
Two-Dose	358	203183	0	37	0.0364289	0.0295256	0.044946
Two-Dose	359	203146	0	22	0.0364289	0.0295256	0.044946
Two-Dose	360	203124	0	19	0.0364289	0.0295256	0.044946
Two-Dose	361	203105	0	16	0.0364289	0.0295256	0.044946
Two-Dose	362	203089	0	26	0.0364289	0.0295256	0.044946
Two-Dose	363	203063	2	13	0.0374135	0.0303935	0.0460544
Two-Dose	364	203048	1	32	0.0379058	0.0308282	0.0466079
Two-Dose	365	203015	0	30	0.0379058	0.0308282	0.0466079
Two-Dose	366	202985	1	15	0.0383982	0.0312633	0.0471611
Two-Dose	367	202969	0	20	0.0383982	0.0312633	0.0471611
Two-Dose	368	202949	0	15	0.0383982	0.0312633	0.0471611
Two-Dose	369	202934	0	11	0.0383982	0.0312633	0.0471611
Two-Dose	370	202923	0	28	0.0383982	0.0312633	0.0471611
Two-Dose	371	202895	0	20	0.0383982	0.0312633	0.0471611
Two-Dose	372	202875	0	29	0.0383982	0.0312633	0.0471611
Two-Dose	373	202846	0	23	0.0383982	0.0312633	0.0471611
Two-Dose	374	202823	1	16	0.0388911	0.0316992	0.0477143
Two-Dose	375	202806	0	15	0.0388911	0.0316992	0.0477143
Two-Dose	376	202791	0	20	0.0388911	0.0316992	0.0477143
Two-Dose	377	202771	0	22	0.0388911	0.0316992	0.0477143
Two-Dose	378	202749	0	21	0.0388911	0.0316992	0.0477143
Two-Dose	379	202728	2	23	0.0398773	0.0325724	0.0488199
Two-Dose	380	202703	0	23	0.0398773	0.0325724	0.0488199
Two-Dose	381	202680	0	16	0.0398773	0.0325724	0.0488199
Two-Dose	382	202664	0	21	0.0398773	0.0325724	0.0488199
Two-Dose	383	202643	0	16	0.0398773	0.0325724	0.0488199
Two-Dose	384	202627	0	29	0.0398773	0.0325724	0.0488199
Two-Dose	385	202598	0	19	0.0398773	0.0325724	0.0488199
Two-Dose	386	202579	0	26	0.0398773	0.0325724	0.0488199
Two-Dose	387	202553	0	19	0.0398773	0.0325724	0.0488199
Two-Dose	388	202534	0	11	0.0398773	0.0325724	0.0488199
Two-Dose	389	202523	0	10	0.0398773	0.0325724	0.0488199
Two-Dose	390	202513	0	14	0.0398773	0.0325724	0.0488199
Two-Dose	391	202499	0	33	0.0398773	0.0325724	0.0488199
Two-Dose	392	202466	0	17	0.0398773	0.0325724	0.0488199
Two-Dose	393	202449	1	21	0.040371	0.0330102	0.0493728
Two-Dose	394	202427	1	17	0.0408648	0.0334483	0.0499254
Two-Dose	395	202409	1	12	0.0413587	0.0338868	0.0504776
Two-Dose	396	202396	0	16	0.0413587	0.0338868	0.0504776
Two-Dose	397	202380	0	29	0.0413587	0.0338868	0.0504776
Two-Dose	398	202351	0	26	0.0413587	0.0338868	0.0504776
Two-Dose	399	202325	0	20	0.0413587	0.0338868	0.0504776
Two-Dose	400	202305	1	26	0.0418528	0.0343259	0.0510296
Two-Dose	401	202278	0	22	0.0418528	0.0343259	0.0510296
Two-Dose	402	202256	1	9	0.042347	0.0347655	0.0515814
Two-Dose	403	202246	0	12	0.042347	0.0347655	0.0515814
Two-Dose	404	202234	0	17	0.042347	0.0347655	0.0515814
Two-Dose	405	202217	0	29	0.042347	0.0347655	0.0515814
Two-Dose	406	202188	0	16	0.042347	0.0347655	0.0515814
Two-Dose	407	202172	0	19	0.042347	0.0347655	0.0515814
Two-Dose	408	202153	0	23	0.042347	0.0347655	0.0515814
Two-Dose	409	202130	0	16	0.042347	0.0347655	0.0515814
Two-Dose	410	202114	0	10	0.042347	0.0347655	0.0515814
Two-Dose	411	202104	1	37	0.0428416	0.0352056	0.0521333
Two-Dose	412	202066	0	23	0.0428416	0.0352056	0.0521333
Two-Dose	413	202043	1	20	0.0433363	0.0356462	0.0526849
Two-Dose	414	202022	0	20	0.0433363	0.0356462	0.0526849
Two-Dose	415	202002	0	21	0.0433363	0.0356462	0.0526849
Two-Dose	416	201981	0	12	0.0433363	0.0356462	0.0526849
Two-Dose	417	201969	0	12	0.0433363	0.0356462	0.0526849
Two-Dose	418	201957	0	15	0.0433363	0.0356462	0.0526849
Two-Dose	419	201942	0	29	0.0433363	0.0356462	0.0526849
Two-Dose	420	201913	1	15	0.0438313	0.0360874	0.0532365
Two-Dose	421	201897	0	32	0.0438313	0.0360874	0.0532365
Two-Dose	422	201865	0	23	0.0438313	0.0360874	0.0532365
Two-Dose	423	201842	1	14	0.0443266	0.0365291	0.053788
Two-Dose	424	201827	0	11	0.0443266	0.0365291	0.053788
Two-Dose	425	201816	0	19	0.0443266	0.0365291	0.053788
Two-Dose	426	201797	0	30	0.0443266	0.0365291	0.053788
Two-Dose	427	201767	0	32	0.0443266	0.0365291	0.053788
Two-Dose	428	201735	0	41	0.0443266	0.0365291	0.053788
Two-Dose	429	201694	0	22	0.0443266	0.0365291	0.053788
Two-Dose	430	201672	0	10	0.0443266	0.0365291	0.053788
Two-Dose	431	201662	0	12	0.0443266	0.0365291	0.053788
Two-Dose	432	201650	0	17	0.0443266	0.0365291	0.053788
Two-Dose	433	201633	0	37	0.0443266	0.0365291	0.053788
Two-Dose	434	201596	0	14	0.0443266	0.0365291	0.053788
Two-Dose	435	201582	0	31	0.0443266	0.0365291	0.053788
Two-Dose	436	201551	1	26	0.0448225	0.0369717	0.0543399
Two-Dose	437	201524	0	12	0.0448225	0.0369717	0.0543399
Two-Dose	438	201512	0	8	0.0448225	0.0369717	0.0543399
Two-Dose	439	201504	0	21	0.0448225	0.0369717	0.0543399
Two-Dose	440	201483	0	35	0.0448225	0.0369717	0.0543399
Two-Dose	441	201448	0	26	0.0448225	0.0369717	0.0543399
Two-Dose	442	201422	0	39	0.0448225	0.0369717	0.0543399
Two-Dose	443	201383	0	35	0.0448225	0.0369717	0.0543399
Two-Dose	444	201348	0	8	0.0448225	0.0369717	0.0543399
Two-Dose	445	201340	0	11	0.0448225	0.0369717	0.0543399
Two-Dose	446	201329	0	41	0.0448225	0.0369717	0.0543399
Two-Dose	447	201288	0	43	0.0448225	0.0369717	0.0543399
Two-Dose	448	201245	0	27	0.0448225	0.0369717	0.0543399
Two-Dose	449	201218	0	43	0.0448225	0.0369717	0.0543399
Two-Dose	450	201175	1	41	0.0453194	0.0374153	0.0548927
Two-Dose	451	201133	0	10	0.0453194	0.0374153	0.0548927
Two-Dose	452	201123	0	9	0.0453194	0.0374153	0.0548927
Two-Dose	453	201114	1	55	0.0458164	0.0378594	0.0554452
Two-Dose	454	201058	0	52	0.0458164	0.0378594	0.0554452
Two-Dose	455	201006	0	23	0.0458164	0.0378594	0.0554452
Two-Dose	456	200983	0	29	0.0458164	0.0378594	0.0554452
Two-Dose	457	200954	1	52	0.0463138	0.038304	0.0559979
Two-Dose	458	200901	0	13	0.0463138	0.038304	0.0559979
Two-Dose	459	200888	0	11	0.0463138	0.038304	0.0559979
Two-Dose	460	200877	0	37	0.0463138	0.038304	0.0559979
Two-Dose	461	200840	0	55	0.0463138	0.038304	0.0559979
Two-Dose	462	200785	0	32	0.0463138	0.038304	0.0559979
Two-Dose	463	200753	0	29	0.0463138	0.038304	0.0559979
Two-Dose	464	200724	0	30	0.0463138	0.038304	0.0559979
Two-Dose	465	200694	0	17	0.0463138	0.038304	0.0559979
Two-Dose	466	200677	0	17	0.0463138	0.038304	0.0559979
Two-Dose	467	200660	0	43	0.0463138	0.038304	0.0559979
Two-Dose	468	200617	0	45	0.0463138	0.038304	0.0559979
Two-Dose	469	200572	0	37	0.0463138	0.038304	0.0559979
Two-Dose	470	200535	0	33	0.0463138	0.038304	0.0559979
Two-Dose	471	200502	0	42	0.0463138	0.038304	0.0559979
Two-Dose	472	200460	0	9	0.0463138	0.038304	0.0559979
Two-Dose	473	200451	0	13	0.0463138	0.038304	0.0559979
Two-Dose	474	200438	0	43	0.0463138	0.038304	0.0559979
Two-Dose	475	200395	0	30	0.0463138	0.038304	0.0559979
Two-Dose	476	200365	0	25	0.0463138	0.038304	0.0559979
Two-Dose	477	200340	0	19	0.0463138	0.038304	0.0559979
Two-Dose	478	200321	0	7	0.0463138	0.038304	0.0559979
Two-Dose	479	200314	0	6	0.0463138	0.038304	0.0559979
Two-Dose	480	200308	0	9	0.0463138	0.038304	0.0559979
Two-Dose	481	200299	0	60	0.0463138	0.038304	0.0559979
Two-Dose	482	200239	0	34	0.0463138	0.038304	0.0559979
Two-Dose	483	200205	0	24	0.0463138	0.038304	0.0559979
Two-Dose	484	200181	0	20	0.0463138	0.038304	0.0559979
Two-Dose	485	200161	0	24	0.0463138	0.038304	0.0559979
Two-Dose	486	200137	1	11	0.0468132	0.0387507	0.0565527
Two-Dose	487	200125	0	10	0.0468132	0.0387507	0.0565527
Two-Dose	488	200115	1	37	0.0473127	0.0391976	0.0571073
Two-Dose	489	200077	1	26	0.0478122	0.039645	0.0576616
Two-Dose	490	200050	0	23	0.0478122	0.039645	0.0576616
Two-Dose	491	200027	0	45	0.0478122	0.039645	0.0576616
Two-Dose	492	199982	1	25	0.048312	0.0400928	0.0582158
Two-Dose	493	199956	0	4	0.048312	0.0400928	0.0582158
Two-Dose	494	199952	0	12	0.048312	0.0400928	0.0582158
Two-Dose	495	199940	0	32	0.048312	0.0400928	0.0582158
Two-Dose	496	199908	0	31	0.048312	0.0400928	0.0582158
Two-Dose	497	199877	0	27	0.048312	0.0400928	0.0582158
Two-Dose	498	199850	0	26	0.048312	0.0400928	0.0582158
Two-Dose	499	199824	1	35	0.0488122	0.0405412	0.0587702
Two-Dose	500	199788	0	6	0.0488122	0.0405412	0.0587702
Two-Dose	501	199782	0	16	0.0488122	0.0405412	0.0587702
Two-Dose	502	199766	0	41	0.0488122	0.0405412	0.0587702
Two-Dose	503	199725	0	28	0.0488122	0.0405412	0.0587702
Two-Dose	504	199697	0	26	0.0488122	0.0405412	0.0587702
Two-Dose	505	199671	0	30	0.0488122	0.0405412	0.0587702
Two-Dose	506	199641	0	41	0.0488122	0.0405412	0.0587702
Two-Dose	507	199600	0	10	0.0488122	0.0405412	0.0587702
Two-Dose	508	199590	0	8	0.0488122	0.0405412	0.0587702
Two-Dose	509	199582	0	36	0.0488122	0.0405412	0.0587702
Two-Dose	510	199546	0	57	0.0488122	0.0405412	0.0587702
Two-Dose	511	199489	0	42	0.0488122	0.0405412	0.0587702
Two-Dose	512	199447	0	38	0.0488122	0.0405412	0.0587702
Two-Dose	513	199409	0	58	0.0488122	0.0405412	0.0587702
Two-Dose	514	199351	0	7	0.0488122	0.0405412	0.0587702
Two-Dose	515	199344	1	9	0.0493136	0.0409909	0.0593257
Two-Dose	516	199334	0	57	0.0493136	0.0409909	0.0593257
Two-Dose	517	199277	0	56	0.0493136	0.0409909	0.0593257
Two-Dose	518	199221	0	49	0.0493136	0.0409909	0.0593257
Two-Dose	519	199172	0	58	0.0493136	0.0409909	0.0593257
Two-Dose	520	199114	0	72	0.0493136	0.0409909	0.0593257
Two-Dose	521	199042	0	19	0.0493136	0.0409909	0.0593257
Two-Dose	522	199023	0	16	0.0493136	0.0409909	0.0593257
Two-Dose	523	199007	0	58	0.0493136	0.0409909	0.0593257
Two-Dose	524	198949	0	91	0.0493136	0.0409909	0.0593257
Two-Dose	525	198858	0	71	0.0493136	0.0409909	0.0593257
Two-Dose	526	198787	0	82	0.0493136	0.0409909	0.0593257
Two-Dose	527	198705	0	97	0.0493136	0.0409909	0.0593257
Two-Dose	528	198608	0	23	0.0493136	0.0409909	0.0593257
Two-Dose	529	198585	0	17	0.0493136	0.0409909	0.0593257
Two-Dose	530	198568	0	111	0.0493136	0.0409909	0.0593257
Two-Dose	531	198457	0	104	0.0493136	0.0409909	0.0593257
Two-Dose	532	198353	0	83	0.0493136	0.0409909	0.0593257
Two-Dose	533	198270	0	87	0.0493136	0.0409909	0.0593257
Two-Dose	534	198183	0	90	0.0493136	0.0409909	0.0593257
Two-Dose	535	198093	0	24	0.0493136	0.0409909	0.0593257
Two-Dose	536	198069	0	34	0.0493136	0.0409909	0.0593257
Two-Dose	537	198035	0	121	0.0493136	0.0409909	0.0593257
Two-Dose	538	197914	0	105	0.0493136	0.0409909	0.0593257
Two-Dose	539	197809	0	70	0.0493136	0.0409909	0.0593257
Two-Dose	540	197739	0	117	0.0493136	0.0409909	0.0593257
Two-Dose	541	197622	0	102	0.0493136	0.0409909	0.0593257
Two-Dose	542	197520	0	30	0.0493136	0.0409909	0.0593257
Two-Dose	543	197490	0	24	0.0493136	0.0409909	0.0593257
Two-Dose	544	197466	0	117	0.0493136	0.0409909	0.0593257
Two-Dose	545	197349	0	134	0.0493136	0.0409909	0.0593257
Two-Dose	546	197215	1	98	0.0498204	0.0414452	0.0598876
Two-Dose	547	197116	0	117	0.0498204	0.0414452	0.0598876
Two-Dose	548	196999	0	114	0.0498204	0.0414452	0.0598876
Two-Dose	549	196885	2	35	0.0508358	0.0423561	0.0610125
Two-Dose	550	196848	0	37	0.0508358	0.0423561	0.0610125
Two-Dose	551	196811	0	99	0.0508358	0.0423561	0.0610125
Two-Dose	552	196712	0	154	0.0508358	0.0423561	0.0610125
Two-Dose	553	196558	0	96	0.0508358	0.0423561	0.0610125
Two-Dose	554	196462	0	96	0.0508358	0.0423561	0.0610125
Two-Dose	555	196366	0	124	0.0508358	0.0423561	0.0610125
Two-Dose	556	196242	0	22	0.0508358	0.0423561	0.0610125
Two-Dose	557	196220	0	18	0.0508358	0.0423561	0.0610125
Two-Dose	558	196202	2	144	0.0518546	0.043271	0.0621403
Two-Dose	559	196056	0	132	0.0518546	0.043271	0.0621403
Two-Dose	560	195924	0	89	0.0518546	0.043271	0.0621403
Two-Dose	561	195835	0	110	0.0518546	0.043271	0.0621403
Two-Dose	562	195725	0	159	0.0518546	0.043271	0.0621403
Two-Dose	563	195566	0	44	0.0518546	0.043271	0.0621403
Two-Dose	564	195522	0	24	0.0518546	0.043271	0.0621403
Two-Dose	565	195498	0	137	0.0518546	0.043271	0.0621403
Two-Dose	566	195361	0	137	0.0518546	0.043271	0.0621403
Two-Dose	567	195224	0	96	0.0518546	0.043271	0.0621403
Two-Dose	568	195128	0	111	0.0518546	0.043271	0.0621403
Two-Dose	569	195017	0	116	0.0518546	0.043271	0.0621403
Two-Dose	570	194901	1	33	0.0523674	0.0437317	0.0627079
Two-Dose	571	194867	0	25	0.0523674	0.0437317	0.0627079
Two-Dose	572	194842	0	129	0.0523674	0.0437317	0.0627079
Two-Dose	573	194713	0	131	0.0523674	0.0437317	0.0627079
Two-Dose	574	194582	0	92	0.0523674	0.0437317	0.0627079
Two-Dose	575	194490	0	138	0.0523674	0.0437317	0.0627079
Two-Dose	576	194352	0	146	0.0523674	0.0437317	0.0627079
Two-Dose	577	194206	0	52	0.0523674	0.0437317	0.0627079
Two-Dose	578	194154	1	26	0.0528822	0.0441942	0.0632776
Two-Dose	579	194127	0	158	0.0528822	0.0441942	0.0632776
Two-Dose	580	193969	0	138	0.0528822	0.0441942	0.0632776
Two-Dose	581	193831	0	86	0.0528822	0.0441942	0.0632776
Two-Dose	582	193745	0	142	0.0528822	0.0441942	0.0632776
Two-Dose	583	193603	0	166	0.0528822	0.0441942	0.0632776
Two-Dose	584	193437	0	53	0.0528822	0.0441942	0.0632776
Two-Dose	585	193384	0	19	0.0528822	0.0441942	0.0632776
Two-Dose	586	193365	0	184	0.0528822	0.0441942	0.0632776
Two-Dose	587	193181	1	153	0.0533996	0.0446591	0.0638502
Two-Dose	588	193027	0	168	0.0533996	0.0446591	0.0638502
Two-Dose	589	192859	1	172	0.0539178	0.0451249	0.0644235
Two-Dose	590	192686	0	223	0.0539178	0.0451249	0.0644235
Two-Dose	591	192463	0	56	0.0539178	0.0451249	0.0644235
Two-Dose	592	192407	0	23	0.0539178	0.0451249	0.0644235
Two-Dose	593	192384	0	201	0.0539178	0.0451249	0.0644235
Two-Dose	594	192183	0	184	0.0539178	0.0451249	0.0644235
Two-Dose	595	191999	0	162	0.0539178	0.0451249	0.0644235
Two-Dose	596	191837	0	191	0.0539178	0.0451249	0.0644235
Two-Dose	597	191646	0	248	0.0539178	0.0451249	0.0644235
Two-Dose	598	191398	0	70	0.0539178	0.0451249	0.0644235
Two-Dose	599	191328	0	42	0.0539178	0.0451249	0.0644235
Two-Dose	600	191286	0	213	0.0539178	0.0451249	0.0644235
Two-Dose	601	191073	0	206	0.0539178	0.0451249	0.0644235
Two-Dose	602	190867	0	180	0.0539178	0.0451249	0.0644235
Two-Dose	603	190687	0	220	0.0539178	0.0451249	0.0644235
Two-Dose	604	190467	0	278	0.0539178	0.0451249	0.0644235
Two-Dose	605	190189	0	63	0.0539178	0.0451249	0.0644235
Two-Dose	606	190126	0	34	0.0539178	0.0451249	0.0644235
Two-Dose	607	190092	0	307	0.0539178	0.0451249	0.0644235
Two-Dose	608	189785	0	237	0.0539178	0.0451249	0.0644235
Two-Dose	609	189548	0	221	0.0539178	0.0451249	0.0644235
Two-Dose	610	189327	0	216	0.0539178	0.0451249	0.0644235
Two-Dose	611	189111	0	315	0.0539178	0.0451249	0.0644235
Two-Dose	612	188796	1	96	0.0544472	0.0456001	0.0650102
Two-Dose	613	188699	0	29	0.0544472	0.0456001	0.0650102
Two-Dose	614	188670	0	295	0.0544472	0.0456001	0.0650102
Two-Dose	615	188375	0	283	0.0544472	0.0456001	0.0650102
Two-Dose	616	188092	0	261	0.0544472	0.0456001	0.0650102
Two-Dose	617	187831	1	302	0.0549793	0.0460778	0.0655999
Two-Dose	618	187528	0	395	0.0549793	0.0460778	0.0655999
Two-Dose	619	187133	0	86	0.0549793	0.0460778	0.0655999
Two-Dose	620	187047	0	39	0.0549793	0.0460778	0.0655999
Two-Dose	621	187008	0	341	0.0549793	0.0460778	0.0655999
Two-Dose	622	186667	0	307	0.0549793	0.0460778	0.0655999
Two-Dose	623	186360	0	278	0.0549793	0.0460778	0.0655999
Two-Dose	624	186082	0	328	0.0549793	0.0460778	0.0655999
Two-Dose	625	185754	2	397	0.0560554	0.0470436	0.0667929
Two-Dose	626	185355	0	125	0.0560554	0.0470436	0.0667929
Two-Dose	627	185230	0	59	0.0560554	0.0470436	0.0667929
Two-Dose	628	185171	0	399	0.0560554	0.0470436	0.0667929
Two-Dose	629	184772	0	416	0.0560554	0.0470436	0.0667929
Two-Dose	630	184356	0	358	0.0560554	0.0470436	0.0667929
Two-Dose	631	183998	0	490	0.0560554	0.0470436	0.0667929
Two-Dose	632	183508	0	467	0.0560554	0.0470436	0.0667929
Two-Dose	633	183041	1	111	0.0566014	0.0475335	0.0673987
Two-Dose	634	182929	0	69	0.0566014	0.0475335	0.0673987
Two-Dose	635	182860	0	193	0.0566014	0.0475335	0.0673987
Two-Dose	636	182667	0	154	0.0566014	0.0475335	0.0673987
Two-Dose	637	182513	0	161	0.0566014	0.0475335	0.0673987
Two-Dose	638	182352	0	141	0.0566014	0.0475335	0.0673987
Two-Dose	639	182211	0	125	0.0566014	0.0475335	0.0673987
Two-Dose	640	182086	0	48	0.0566014	0.0475335	0.0673987
Two-Dose	641	182038	0	72	0.0566014	0.0475335	0.0673987
Two-Dose	642	181966	1	387	0.0571507	0.0480262	0.0680081
Two-Dose	643	181578	0	300	0.0571507	0.0480262	0.0680081
Two-Dose	644	181278	1	313	0.057702	0.048521	0.0686196
Two-Dose	645	180964	0	403	0.057702	0.048521	0.0686196
Two-Dose	646	180561	0	475	0.057702	0.048521	0.0686196
Two-Dose	647	180086	0	147	0.057702	0.048521	0.0686196
Two-Dose	648	179939	0	87	0.057702	0.048521	0.0686196
Two-Dose	649	179852	0	347	0.057702	0.048521	0.0686196
Two-Dose	650	179505	0	337	0.057702	0.048521	0.0686196
Two-Dose	651	179168	0	315	0.057702	0.048521	0.0686196
Two-Dose	652	178853	0	382	0.057702	0.048521	0.0686196
Two-Dose	653	178471	0	477	0.057702	0.048521	0.0686196
Two-Dose	654	177994	0	127	0.057702	0.048521	0.0686196
Two-Dose	655	177867	1	100	0.0582639	0.0490245	0.0692439
Two-Dose	656	177766	0	440	0.0582639	0.0490245	0.0692439
Two-Dose	657	177326	0	413	0.0582639	0.0490245	0.0692439
Two-Dose	658	176913	0	369	0.0582639	0.0490245	0.0692439
Two-Dose	659	176544	0	496	0.0582639	0.0490245	0.0692439
Two-Dose	660	176048	1	497	0.0588316	0.0495331	0.0698749
Two-Dose	661	175550	0	152	0.0588316	0.0495331	0.0698749
Two-Dose	662	175398	0	106	0.0588316	0.0495331	0.0698749
Two-Dose	663	175292	0	503	0.0588316	0.0495331	0.0698749
Two-Dose	664	174789	0	457	0.0588316	0.0495331	0.0698749
Two-Dose	665	174332	0	449	0.0588316	0.0495331	0.0698749
Two-Dose	666	173883	0	586	0.0588316	0.0495331	0.0698749
Two-Dose	667	173297	0	598	0.0588316	0.0495331	0.0698749
Two-Dose	668	172699	0	197	0.0588316	0.0495331	0.0698749
Two-Dose	669	172502	0	174	0.0588316	0.0495331	0.0698749
Two-Dose	670	172328	0	557	0.0588316	0.0495331	0.0698749
Two-Dose	671	171771	0	520	0.0588316	0.0495331	0.0698749
Two-Dose	672	171251	0	448	0.0588316	0.0495331	0.0698749
Two-Dose	673	170803	0	540	0.0588316	0.0495331	0.0698749
Two-Dose	674	170263	0	605	0.0588316	0.0495331	0.0698749
Two-Dose	675	169658	0	159	0.0588316	0.0495331	0.0698749
Two-Dose	676	169499	0	20	0.0588316	0.0495331	0.0698749
Two-Dose	677	169479	1	616	0.0594213	0.0500597	0.0705329
Two-Dose	678	168862	1	558	0.0600131	0.0505884	0.0711931
Two-Dose	679	168303	0	506	0.0600131	0.0505884	0.0711931
Two-Dose	680	167797	0	524	0.0600131	0.0505884	0.0711931
Two-Dose	681	167273	0	612	0.0600131	0.0505884	0.0711931
Two-Dose	682	166661	1	197	0.0606128	0.0511237	0.0718625
Two-Dose	683	166463	0	197	0.0606128	0.0511237	0.0718625
Two-Dose	684	166266	0	708	0.0606128	0.0511237	0.0718625
Two-Dose	685	165558	0	562	0.0606128	0.0511237	0.0718625
Two-Dose	686	164996	1	597	0.0612185	0.0516642	0.072539
Two-Dose	687	164398	0	651	0.0612185	0.0516642	0.072539
Two-Dose	688	163747	0	765	0.0612185	0.0516642	0.072539
Two-Dose	689	162982	0	247	0.0612185	0.0516642	0.072539
Two-Dose	690	162735	0	105	0.0612185	0.0516642	0.072539
Two-Dose	691	162630	0	734	0.0612185	0.0516642	0.072539
Two-Dose	692	161896	0	804	0.0612185	0.0516642	0.072539
Two-Dose	693	161092	0	736	0.0612185	0.0516642	0.072539
Two-Dose	694	160356	0	674	0.0612185	0.0516642	0.072539
Two-Dose	695	159682	0	738	0.0612185	0.0516642	0.072539
Two-Dose	696	158944	0	359	0.0612185	0.0516642	0.072539
Two-Dose	697	158585	0	282	0.0612185	0.0516642	0.072539
Two-Dose	698	158303	0	873	0.0612185	0.0516642	0.072539
Two-Dose	699	157430	2	779	0.0624881	0.0527928	0.0739634
Two-Dose	700	156649	0	751	0.0624881	0.0527928	0.0739634
Two-Dose	701	155898	0	497	0.0624881	0.0527928	0.0739634
Two-Dose	702	155401	0	520	0.0624881	0.0527928	0.0739634
Two-Dose	703	154881	0	273	0.0624881	0.0527928	0.0739634
Two-Dose	704	154608	0	181	0.0624881	0.0527928	0.0739634
Two-Dose	705	154427	0	412	0.0624881	0.0527928	0.0739634
Two-Dose	706	154015	0	218	0.0624881	0.0527928	0.0739634
Two-Dose	707	153797	0	184	0.0624881	0.0527928	0.0739634
Two-Dose	708	153613	0	96	0.0624881	0.0527928	0.0739634
Two-Dose	709	153517	0	215	0.0624881	0.0527928	0.0739634
Two-Dose	710	153302	0	169	0.0624881	0.0527928	0.0739634
Two-Dose	711	153133	0	158	0.0624881	0.0527928	0.0739634
Two-Dose	712	152975	1	471	0.0631414	0.0533723	0.074698
Two-Dose	713	152503	0	406	0.0631414	0.0533723	0.074698
Two-Dose	714	152097	0	474	0.0631414	0.0533723	0.074698
Two-Dose	715	151623	0	499	0.0631414	0.0533723	0.074698
Two-Dose	716	151124	0	543	0.0631414	0.0533723	0.074698
Two-Dose	717	150581	0	189	0.0631414	0.0533723	0.074698
Two-Dose	718	150392	0	190	0.0631414	0.0533723	0.074698
Two-Dose	719	150202	0	519	0.0631414	0.0533723	0.074698
Two-Dose	720	149683	0	493	0.0631414	0.0533723	0.074698
Two-Dose	721	149190	1	499	0.0638113	0.0539654	0.0754529
Two-Dose	722	148690	0	446	0.0638113	0.0539654	0.0754529
Two-Dose	723	148244	0	503	0.0638113	0.0539654	0.0754529
Two-Dose	724	147741	0	222	0.0638113	0.0539654	0.0754529
Two-Dose	725	147519	0	171	0.0638113	0.0539654	0.0754529
Two-Dose	726	147348	0	488	0.0638113	0.0539654	0.0754529
Two-Dose	727	146860	0	497	0.0638113	0.0539654	0.0754529
Two-Dose	728	146363	0	510	0.0638113	0.0539654	0.0754529
Two-Dose	729	145853	0	486	0.0638113	0.0539654	0.0754529
Two-Dose	730	145367	0	533	0.0638113	0.0539654	0.0754529
Two-Dose	731	144834	0	193	0.0638113	0.0539654	0.0754529
Two-Dose	732	144641	0	187	0.0638113	0.0539654	0.0754529
Two-Dose	733	144454	0	469	0.0638113	0.0539654	0.0754529
Two-Dose	734	143985	0	482	0.0638113	0.0539654	0.0754529
Two-Dose	735	143503	0	413	0.0638113	0.0539654	0.0754529
Two-Dose	736	143090	0	410	0.0638113	0.0539654	0.0754529
Two-Dose	737	142680	0	499	0.0638113	0.0539654	0.0754529
Two-Dose	738	142181	0	171	0.0638113	0.0539654	0.0754529
Two-Dose	739	142010	1	222	0.064515	0.0545854	0.0762502
Two-Dose	740	141787	0	846	0.064515	0.0545854	0.0762502
Two-Dose	741	140941	0	736	0.064515	0.0545854	0.0762502
Two-Dose	742	140205	0	702	0.064515	0.0545854	0.0762502
Two-Dose	743	139503	0	734	0.064515	0.0545854	0.0762502
Two-Dose	744	138769	0	879	0.064515	0.0545854	0.0762502
Two-Dose	745	137890	0	309	0.064515	0.0545854	0.0762502
Two-Dose	746	137581	0	267	0.064515	0.0545854	0.0762502
Two-Dose	747	137314	0	868	0.064515	0.0545854	0.0762502
Two-Dose	748	136446	0	742	0.064515	0.0545854	0.0762502
Two-Dose	749	135704	0	807	0.064515	0.0545854	0.0762502
Two-Dose	750	134897	0	846	0.064515	0.0545854	0.0762502
Two-Dose	751	134051	0	1005	0.064515	0.0545854	0.0762502
Two-Dose	752	133046	0	336	0.064515	0.0545854	0.0762502
Two-Dose	753	132710	1	301	0.065268	0.055244	0.0771102
Two-Dose	754	132408	0	963	0.065268	0.055244	0.0771102
Two-Dose	755	131445	0	970	0.065268	0.055244	0.0771102
Two-Dose	756	130475	0	958	0.065268	0.055244	0.0771102
Two-Dose	757	129517	0	948	0.065268	0.055244	0.0771102
Two-Dose	758	128569	0	1016	0.065268	0.055244	0.0771102
Two-Dose	759	127553	0	338	0.065268	0.055244	0.0771102
Two-Dose	760	127215	0	298	0.065268	0.055244	0.0771102
Two-Dose	761	126917	0	1023	0.065268	0.055244	0.0771102
Two-Dose	762	125894	0	901	0.065268	0.055244	0.0771102
Two-Dose	763	124993	0	1009	0.065268	0.055244	0.0771102
Two-Dose	764	123984	0	985	0.065268	0.055244	0.0771102
Two-Dose	765	122999	0	1095	0.065268	0.055244	0.0771102
Two-Dose	766	121904	0	355	0.065268	0.055244	0.0771102
Two-Dose	767	121549	0	322	0.065268	0.055244	0.0771102
Two-Dose	768	121227	0	1163	0.065268	0.055244	0.0771102
Two-Dose	769	120064	0	993	0.065268	0.055244	0.0771102
Two-Dose	770	119071	0	1100	0.065268	0.055244	0.0771102
Two-Dose	771	117971	0	1662	0.065268	0.055244	0.0771102
Two-Dose	772	116309	0	1640	0.065268	0.055244	0.0771102
Two-Dose	773	114669	0	895	0.065268	0.055244	0.0771102
Two-Dose	774	113774	0	705	0.065268	0.055244	0.0771102
Two-Dose	775	113069	0	1697	0.065268	0.055244	0.0771102
Two-Dose	776	111372	1	1203	0.0661653	0.0560107	0.0781602
Two-Dose	777	110168	1	1303	0.0670725	0.0567861	0.0792214
Two-Dose	778	108864	0	1294	0.0670725	0.0567861	0.0792214
Two-Dose	779	107570	0	1469	0.0670725	0.0567861	0.0792214
Two-Dose	780	106101	0	775	0.0670725	0.0567861	0.0792214
Two-Dose	781	105326	0	560	0.0670725	0.0567861	0.0792214
Two-Dose	782	104766	0	1751	0.0670725	0.0567861	0.0792214
Two-Dose	783	103015	0	1571	0.0670725	0.0567861	0.0792214
Two-Dose	784	101444	0	1611	0.0670725	0.0567861	0.0792214
Two-Dose	785	99833	0	1417	0.0670725	0.0567861	0.0792214
Two-Dose	786	98416	0	1407	0.0670725	0.0567861	0.0792214
Two-Dose	787	97009	0	693	0.0670725	0.0567861	0.0792214
Two-Dose	788	96316	0	579	0.0670725	0.0567861	0.0792214
Two-Dose	789	95737	1	1526	0.0681163	0.0576597	0.0804685
Two-Dose	790	94210	0	1302	0.0681163	0.0576597	0.0804685
Two-Dose	791	92908	0	1019	0.0681163	0.0576597	0.0804685
Two-Dose	792	91889	0	1645	0.0681163	0.0576597	0.0804685
Two-Dose	793	90244	0	1691	0.0681163	0.0576597	0.0804685
Two-Dose	794	88553	0	839	0.0681163	0.0576597	0.0804685
Two-Dose	795	87714	0	660	0.0681163	0.0576597	0.0804685
Two-Dose	796	87054	0	1919	0.0681163	0.0576597	0.0804685
Two-Dose	797	85135	0	1580	0.0681163	0.0576597	0.0804685
Two-Dose	798	83555	0	1494	0.0681163	0.0576597	0.0804685
Two-Dose	799	82061	0	1634	0.0681163	0.0576597	0.0804685
Two-Dose	800	80427	0	1779	0.0681163	0.0576597	0.0804685
Two-Dose	801	78648	0	773	0.0681163	0.0576597	0.0804685
Two-Dose	802	77875	0	682	0.0681163	0.0576597	0.0804685
Two-Dose	803	77193	0	1836	0.0681163	0.0576597	0.0804685
Two-Dose	804	75357	0	1506	0.0681163	0.0576597	0.0804685
Two-Dose	805	73851	0	1490	0.0681163	0.0576597	0.0804685
Two-Dose	806	72361	0	1464	0.0681163	0.0576597	0.0804685
Two-Dose	807	70897	0	1461	0.0681163	0.0576597	0.0804685
Two-Dose	808	69436	0	615	0.0681163	0.0576597	0.0804685
Two-Dose	809	68821	0	603	0.0681163	0.0576597	0.0804685
Two-Dose	810	68218	0	1606	0.0681163	0.0576597	0.0804685
Two-Dose	811	66612	0	1479	0.0681163	0.0576597	0.0804685
Two-Dose	812	65133	0	1495	0.0681163	0.0576597	0.0804685
Two-Dose	813	63638	0	1478	0.0681163	0.0576597	0.0804685
Two-Dose	814	62160	1	1518	0.0697239	0.0588843	0.0825581
Two-Dose	815	60641	0	737	0.0697239	0.0588843	0.0825581
Two-Dose	816	59904	0	644	0.0697239	0.0588843	0.0825581
Two-Dose	817	59260	0	1636	0.0697239	0.0588843	0.0825581
Two-Dose	818	57624	0	1278	0.0697239	0.0588843	0.0825581
Two-Dose	819	56346	0	1474	0.0697239	0.0588843	0.0825581
Two-Dose	820	54872	0	1396	0.0697239	0.0588843	0.0825581
Two-Dose	821	53476	0	1436	0.0697239	0.0588843	0.0825581
Two-Dose	822	52040	0	868	0.0697239	0.0588843	0.0825581
Two-Dose	823	51172	0	774	0.0697239	0.0588843	0.0825581
Two-Dose	824	50398	0	1752	0.0697239	0.0588843	0.0825581
Two-Dose	825	48646	0	1762	0.0697239	0.0588843	0.0825581
Two-Dose	826	46884	0	1842	0.0697239	0.0588843	0.0825581
Two-Dose	827	45042	0	1604	0.0697239	0.0588843	0.0825581
Two-Dose	828	43438	0	1636	0.0697239	0.0588843	0.0825581
Two-Dose	829	41802	0	908	0.0697239	0.0588843	0.0825581
Two-Dose	830	40894	0	829	0.0697239	0.0588843	0.0825581
Two-Dose	831	40065	0	1797	0.0697239	0.0588843	0.0825581
Two-Dose	832	38268	0	2215	0.0697239	0.0588843	0.0825581
Two-Dose	833	36053	0	1809	0.0697239	0.0588843	0.0825581
Two-Dose	834	34244	0	1550	0.0697239	0.0588843	0.0825581
Two-Dose	835	32694	0	1405	0.0697239	0.0588843	0.0825581
Two-Dose	836	31289	0	590	0.0697239	0.0588843	0.0825581
Two-Dose	837	30699	0	516	0.0697239	0.0588843	0.0825581
Two-Dose	838	30183	0	1218	0.0697239	0.0588843	0.0825581
Two-Dose	839	28965	0	1369	0.0697239	0.0588843	0.0825581
Two-Dose	840	27596	0	1295	0.0697239	0.0588843	0.0825581
Two-Dose	841	26301	0	1192	0.0697239	0.0588843	0.0825581
Two-Dose	842	25109	0	896	0.0697239	0.0588843	0.0825581
Two-Dose	843	24213	0	499	0.0697239	0.0588843	0.0825581
Two-Dose	844	23714	0	503	0.0697239	0.0588843	0.0825581
Two-Dose	845	23211	0	1145	0.0697239	0.0588843	0.0825581
Two-Dose	846	22066	0	1024	0.0697239	0.0588843	0.0825581
Two-Dose	847	21042	0	1071	0.0697239	0.0588843	0.0825581
Two-Dose	848	19971	0	1018	0.0697239	0.0588843	0.0825581
Two-Dose	849	18953	0	1020	0.0697239	0.0588843	0.0825581
Two-Dose	850	17933	0	473	0.0697239	0.0588843	0.0825581
Three-dose	1	330568	0	3846	0
Three-dose	2	326722	0	3215	0
Three-dose	3	323507	0	3071	0
Three-dose	4	320436	1	2817	0.000312075	4.396e-05	0.00221542
Three-dose	5	317618	0	2598	0.000312075	4.396e-05	0.00221542
Three-dose	6	315020	0	2454	0.000312075	4.396e-05	0.00221542
Three-dose	7	312566	0	2421	0.000312075	4.396e-05	0.00221542
Three-dose	8	310145	0	2126	0.000312075	4.396e-05	0.00221542
Three-dose	9	308019	1	1912	0.000636729	0.000159202	0.00254659
Three-dose	10	306106	0	1948	0.000636729	0.000159202	0.00254659
Three-dose	11	304158	0	1736	0.000636729	0.000159202	0.00254659
Three-dose	12	302422	0	1623	0.000636729	0.000159202	0.00254659
Three-dose	13	300799	0	1752	0.000636729	0.000159202	0.00254659
Three-dose	14	299047	1	1861	0.000971123	0.000313068	0.00301236
Three-dose	15	297185	0	1687	0.000971123	0.000313068	0.00301236
Three-dose	16	295498	0	1445	0.000971123	0.000313068	0.00301236
Three-dose	17	294053	0	1476	0.000971123	0.000313068	0.00301236
Three-dose	18	292577	0	1442	0.000971123	0.000313068	0.00301236
Three-dose	19	291135	0	1434	0.000971123	0.000313068	0.00301236
Three-dose	20	289701	0	1407	0.000971123	0.000313068	0.00301236
Three-dose	21	288294	0	1498	0.000971123	0.000313068	0.00301236
Three-dose	22	286796	0	1379	0.000971123	0.000313068	0.00301236
Three-dose	23	285417	0	1264	0.000971123	0.000313068	0.00301236
Three-dose	24	284153	0	1271	0.000971123	0.000313068	0.00301236
Three-dose	25	282882	1	1223	0.00132462	0.000496649	0.00353291
Three-dose	26	281658	1	1187	0.00167966	0.00069838	0.00403969
Three-dose	27	280470	0	1216	0.00167966	0.00069838	0.00403969
Three-dose	28	279254	1	1244	0.00203775	0.000914544	0.0045404
Three-dose	29	278009	0	1213	0.00203775	0.000914544	0.0045404
Three-dose	30	276796	1	1060	0.00239902	0.00114258	0.00503708
Three-dose	31	275735	0	1112	0.00239902	0.00114258	0.00503708
Three-dose	32	274623	0	1031	0.00239902	0.00114258	0.00503708
Three-dose	33	273592	1	1036	0.00276452	0.00138122	0.00553317
Three-dose	34	272555	1	1046	0.00313141	0.00162784	0.00602369
Three-dose	35	271508	0	1155	0.00313141	0.00162784	0.00602369
Three-dose	36	270353	0	1081	0.00313141	0.00162784	0.00602369
Three-dose	37	269272	0	994	0.00313141	0.00162784	0.00602369
Three-dose	38	268278	0	956	0.00313141	0.00162784	0.00602369
Three-dose	39	267322	0	959	0.00313141	0.00162784	0.00602369
Three-dose	40	266363	0	911	0.00313141	0.00162784	0.00602369
Three-dose	41	265452	0	947	0.00313141	0.00162784	0.00602369
Three-dose	42	264505	0	979	0.00313141	0.00162784	0.00602369
Three-dose	43	263526	0	909	0.00313141	0.00162784	0.00602369
Three-dose	44	262617	2	800	0.00389295	0.00215371	0.00703665
Three-dose	45	261815	0	794	0.00389295	0.00215371	0.00703665
Three-dose	46	261021	0	804	0.00389295	0.00215371	0.00703665
Three-dose	47	260217	0	755	0.00389295	0.00215371	0.00703665
Three-dose	48	259462	1	803	0.00427835	0.00242716	0.00754136
Three-dose	49	258658	0	847	0.00427835	0.00242716	0.00754136
Three-dose	50	257811	0	746	0.00427835	0.00242716	0.00754136
Three-dose	51	257065	0	740	0.00427835	0.00242716	0.00754136
Three-dose	52	256325	0	688	0.00427835	0.00242716	0.00754136
Three-dose	53	255637	1	680	0.00466951	0.00270841	0.00805053
Three-dose	54	254956	0	649	0.00466951	0.00270841	0.00805053
Three-dose	55	254307	0	669	0.00466951	0.00270841	0.00805053
Three-dose	56	253638	0	682	0.00466951	0.00270841	0.00805053
Three-dose	57	252956	0	596	0.00466951	0.00270841	0.00805053
Three-dose	58	252360	0	596	0.00466951	0.00270841	0.00805053
Three-dose	59	251764	0	545	0.00466951	0.00270841	0.00805053
Three-dose	60	251219	0	512	0.00466951	0.00270841	0.00805053
Three-dose	61	250707	0	569	0.00466951	0.00270841	0.00805053
Three-dose	62	250138	0	538	0.00466951	0.00270841	0.00805053
Three-dose	63	249600	0	563	0.00466951	0.00270841	0.00805053
Three-dose	64	249037	0	467	0.00466951	0.00270841	0.00805053
Three-dose	65	248570	0	464	0.00466951	0.00270841	0.00805053
Three-dose	66	248106	0	455	0.00466951	0.00270841	0.00805053
Three-dose	67	247651	0	443	0.00466951	0.00270841	0.00805053
Three-dose	68	247208	0	398	0.00466951	0.00270841	0.00805053
Three-dose	69	246810	0	415	0.00466951	0.00270841	0.00805053
Three-dose	70	246395	0	468	0.00466951	0.00270841	0.00805053
Three-dose	71	245927	0	450	0.00466951	0.00270841	0.00805053
Three-dose	72	245477	0	424	0.00466951	0.00270841	0.00805053
Three-dose	73	245053	0	387	0.00466951	0.00270841	0.00805053
Three-dose	74	244666	0	408	0.00466951	0.00270841	0.00805053
Three-dose	75	244258	0	380	0.00466951	0.00270841	0.00805053
Three-dose	76	243878	0	351	0.00466951	0.00270841	0.00805053
Three-dose	77	243527	0	426	0.00466951	0.00270841	0.00805053
Three-dose	78	243101	0	335	0.00466951	0.00270841	0.00805053
Three-dose	79	242766	0	327	0.00466951	0.00270841	0.00805053
Three-dose	80	242439	0	320	0.00466951	0.00270841	0.00805053
Three-dose	81	242119	0	300	0.00466951	0.00270841	0.00805053
Three-dose	82	241819	0	274	0.00466951	0.00270841	0.00805053
Three-dose	83	241545	0	356	0.00466951	0.00270841	0.00805053
Three-dose	84	241189	1	332	0.0050841	0.00300698	0.00859598
Three-dose	85	240856	0	313	0.0050841	0.00300698	0.00859598
Three-dose	86	240543	0	291	0.0050841	0.00300698	0.00859598
Three-dose	87	240252	0	272	0.0050841	0.00300698	0.00859598
Three-dose	88	239980	0	281	0.0050841	0.00300698	0.00859598
Three-dose	89	239699	0	275	0.0050841	0.00300698	0.00859598
Three-dose	90	239424	0	290	0.0050841	0.00300698	0.00859598
Three-dose	91	239134	0	314	0.0050841	0.00300698	0.00859598
Three-dose	92	238820	0	243	0.0050841	0.00300698	0.00859598
Three-dose	93	238577	0	242	0.0050841	0.00300698	0.00859598
Three-dose	94	238335	0	256	0.0050841	0.00300698	0.00859598
Three-dose	95	238079	0	245	0.0050841	0.00300698	0.00859598
Three-dose	96	237834	0	220	0.0050841	0.00300698	0.00859598
Three-dose	97	237614	0	224	0.0050841	0.00300698	0.00859598
Three-dose	98	237390	1	218	0.00550533	0.00331369	0.00914642
Three-dose	99	237171	0	244	0.00550533	0.00331369	0.00914642
Three-dose	100	236927	0	213	0.00550533	0.00331369	0.00914642
Three-dose	101	236714	0	209	0.00550533	0.00331369	0.00914642
Three-dose	102	236505	0	227	0.00550533	0.00331369	0.00914642
Three-dose	103	236278	0	186	0.00550533	0.00331369	0.00914642
Three-dose	104	236092	0	218	0.00550533	0.00331369	0.00914642
Three-dose	105	235874	0	252	0.00550533	0.00331369	0.00914642
Three-dose	106	235622	0	197	0.00550533	0.00331369	0.00914642
Three-dose	107	235425	0	205	0.00550533	0.00331369	0.00914642
Three-dose	108	235220	0	186	0.00550533	0.00331369	0.00914642
Three-dose	109	235034	0	211	0.00550533	0.00331369	0.00914642
Three-dose	110	234823	0	170	0.00550533	0.00331369	0.00914642
Three-dose	111	234653	0	187	0.00550533	0.00331369	0.00914642
Three-dose	112	234466	1	196	0.00593181	0.00362754	0.00969971
Three-dose	113	234269	0	179	0.00593181	0.00362754	0.00969971
Three-dose	114	234090	0	188	0.00593181	0.00362754	0.00969971
Three-dose	115	233902	0	197	0.00593181	0.00362754	0.00969971
Three-dose	116	233705	0	183	0.00593181	0.00362754	0.00969971
Three-dose	117	233522	1	187	0.00636001	0.00394623	0.0102501
Three-dose	118	233334	0	161	0.00636001	0.00394623	0.0102501
Three-dose	119	233173	0	168	0.00636001	0.00394623	0.0102501
Three-dose	120	233005	0	160	0.00636001	0.00394623	0.0102501
Three-dose	121	232845	0	176	0.00636001	0.00394623	0.0102501
Three-dose	122	232669	0	175	0.00636001	0.00394623	0.0102501
Three-dose	123	232494	1	148	0.0067901	0.00426956	0.0107985
Three-dose	124	232345	0	166	0.0067901	0.00426956	0.0107985
Three-dose	125	232179	1	200	0.00722077	0.00459648	0.0113433
Three-dose	126	231978	0	176	0.00722077	0.00459648	0.0113433
Three-dose	127	231802	0	170	0.00722077	0.00459648	0.0113433
Three-dose	128	231632	1	151	0.00765246	0.004927	0.0118855
Three-dose	129	231480	0	161	0.00765246	0.004927	0.0118855
Three-dose	130	231319	0	158	0.00765246	0.004927	0.0118855
Three-dose	131	231161	0	168	0.00765246	0.004927	0.0118855
Three-dose	132	230993	0	159	0.00765246	0.004927	0.0118855
Three-dose	133	230834	0	217	0.00765246	0.004927	0.0118855
Three-dose	134	230617	0	142	0.00765246	0.004927	0.0118855
Three-dose	135	230475	0	142	0.00765246	0.004927	0.0118855
Three-dose	136	230333	0	149	0.00765246	0.004927	0.0118855
Three-dose	137	230184	0	145	0.00765246	0.004927	0.0118855
Three-dose	138	230039	0	160	0.00765246	0.004927	0.0118855
Three-dose	139	229879	0	158	0.00765246	0.004927	0.0118855
Three-dose	140	229721	0	163	0.00765246	0.004927	0.0118855
Three-dose	141	229558	0	140	0.00765246	0.004927	0.0118855
Three-dose	142	229418	0	129	0.00765246	0.004927	0.0118855
Three-dose	143	229289	0	148	0.00765246	0.004927	0.0118855
Three-dose	144	229141	0	140	0.00765246	0.004927	0.0118855
Three-dose	145	229001	0	150	0.00765246	0.004927	0.0118855
Three-dose	146	228851	0	166	0.00765246	0.004927	0.0118855
Three-dose	147	228685	0	165	0.00765246	0.004927	0.0118855
Three-dose	148	228520	0	148	0.00765246	0.004927	0.0118855
Three-dose	149	228372	0	156	0.00765246	0.004927	0.0118855
Three-dose	150	228216	0	146	0.00765246	0.004927	0.0118855
Three-dose	151	228070	0	136	0.00765246	0.004927	0.0118855
Three-dose	152	227934	0	167	0.00765246	0.004927	0.0118855
Three-dose	153	227767	0	145	0.00765246	0.004927	0.0118855
Three-dose	154	227622	0	148	0.00765246	0.004927	0.0118855
Three-dose	155	227474	0	158	0.00765246	0.004927	0.0118855
Three-dose	156	227316	1	133	0.00809234	0.00526532	0.0124371
Three-dose	157	227182	0	141	0.00809234	0.00526532	0.0124371
Three-dose	158	227041	0	136	0.00809234	0.00526532	0.0124371
Three-dose	159	226905	0	141	0.00809234	0.00526532	0.0124371
Three-dose	160	226764	0	141	0.00809234	0.00526532	0.0124371
Three-dose	161	226623	0	116	0.00809234	0.00526532	0.0124371
Three-dose	162	226507	0	142	0.00809234	0.00526532	0.0124371
Three-dose	163	226365	0	135	0.00809234	0.00526532	0.0124371
Three-dose	164	226230	1	124	0.00853433	0.00560763	0.0129884
Three-dose	165	226105	0	143	0.00853433	0.00560763	0.0129884
Three-dose	166	225962	0	133	0.00853433	0.00560763	0.0129884
Three-dose	167	225829	0	120	0.00853433	0.00560763	0.0129884
Three-dose	168	225709	0	151	0.00853433	0.00560763	0.0129884
Three-dose	169	225558	0	131	0.00853433	0.00560763	0.0129884
Three-dose	170	225427	0	128	0.00853433	0.00560763	0.0129884
Three-dose	171	225299	0	134	0.00853433	0.00560763	0.0129884
Three-dose	172	225165	0	131	0.00853433	0.00560763	0.0129884
Three-dose	173	225034	1	148	0.00897867	0.00595394	0.0135399
Three-dose	174	224885	1	137	0.0094233	0.00630281	0.0140886
Three-dose	175	224747	0	142	0.0094233	0.00630281	0.0140886
Three-dose	176	224605	0	142	0.0094233	0.00630281	0.0140886
Three-dose	177	224463	0	135	0.0094233	0.00630281	0.0140886
Three-dose	178	224328	0	119	0.0094233	0.00630281	0.0140886
Three-dose	179	224209	0	122	0.0094233	0.00630281	0.0140886
Three-dose	180	224087	0	100	0.0094233	0.00630281	0.0140886
Three-dose	181	223987	0	124	0.0094233	0.00630281	0.0140886
Three-dose	182	223863	0	121	0.0094233	0.00630281	0.0140886
Three-dose	183	223742	0	125	0.0094233	0.00630281	0.0140886
Three-dose	184	223617	0	98	0.0094233	0.00630281	0.0140886
Three-dose	185	223519	0	133	0.0094233	0.00630281	0.0140886
Three-dose	186	223386	0	121	0.0094233	0.00630281	0.0140886
Three-dose	187	223265	0	143	0.0094233	0.00630281	0.0140886
Three-dose	188	223122	0	116	0.0094233	0.00630281	0.0140886
Three-dose	189	223006	0	128	0.0094233	0.00630281	0.0140886
Three-dose	190	222878	1	132	0.00987194	0.00665646	0.0146406
Three-dose	191	222745	0	113	0.00987194	0.00665646	0.0146406
Three-dose	192	222632	0	114	0.00987194	0.00665646	0.0146406
Three-dose	193	222518	0	114	0.00987194	0.00665646	0.0146406
Three-dose	194	222404	0	110	0.00987194	0.00665646	0.0146406
Three-dose	195	222294	1	112	0.0103217	0.00701299	0.0151915
Three-dose	196	222181	1	129	0.0107718	0.00737168	0.01574
Three-dose	197	222051	0	127	0.0107718	0.00737168	0.01574
Three-dose	198	221924	0	104	0.0107718	0.00737168	0.01574
Three-dose	199	221820	0	115	0.0107718	0.00737168	0.01574
Three-dose	200	221705	0	108	0.0107718	0.00737168	0.01574
Three-dose	201	221597	0	106	0.0107718	0.00737168	0.01574
Three-dose	202	221491	0	121	0.0107718	0.00737168	0.01574
Three-dose	203	221370	0	133	0.0107718	0.00737168	0.01574
Three-dose	204	221237	0	113	0.0107718	0.00737168	0.01574
Three-dose	205	221124	0	97	0.0107718	0.00737168	0.01574
Three-dose	206	221027	1	116	0.0112242	0.00773379	0.0162897
Three-dose	207	220910	0	103	0.0112242	0.00773379	0.0162897
Three-dose	208	220807	0	121	0.0112242	0.00773379	0.0162897
Three-dose	209	220686	0	104	0.0112242	0.00773379	0.0162897
Three-dose	210	220582	0	118	0.0112242	0.00773379	0.0162897
Three-dose	211	220464	0	108	0.0112242	0.00773379	0.0162897
Three-dose	212	220356	0	111	0.0112242	0.00773379	0.0162897
Three-dose	213	220245	0	116	0.0112242	0.00773379	0.0162897
Three-dose	214	220129	0	103	0.0112242	0.00773379	0.0162897
Three-dose	215	220026	0	108	0.0112242	0.00773379	0.0162897
Three-dose	216	219918	0	104	0.0112242	0.00773379	0.0162897
Three-dose	217	219814	0	118	0.0112242	0.00773379	0.0162897
Three-dose	218	219696	0	93	0.0112242	0.00773379	0.0162897
Three-dose	219	219603	0	95	0.0112242	0.00773379	0.0162897
Three-dose	220	219508	0	113	0.0112242	0.00773379	0.0162897
Three-dose	221	219395	0	107	0.0112242	0.00773379	0.0162897
Three-dose	222	219288	0	104	0.0112242	0.00773379	0.0162897
Three-dose	223	219184	0	106	0.0112242	0.00773379	0.0162897
Three-dose	224	219078	0	98	0.0112242	0.00773379	0.0162897
Three-dose	225	218980	0	95	0.0112242	0.00773379	0.0162897
Three-dose	226	218885	0	95	0.0112242	0.00773379	0.0162897
Three-dose	227	218790	0	106	0.0112242	0.00773379	0.0162897
Three-dose	228	218684	0	98	0.0112242	0.00773379	0.0162897
Three-dose	229	218586	0	93	0.0112242	0.00773379	0.0162897
Three-dose	230	218493	1	92	0.0116818	0.00810119	0.0168449
Three-dose	231	218400	0	112	0.0116818	0.00810119	0.0168449
Three-dose	232	218288	0	104	0.0116818	0.00810119	0.0168449
Three-dose	233	218184	0	118	0.0116818	0.00810119	0.0168449
Three-dose	234	218066	1	103	0.0121403	0.00847094	0.017399
Three-dose	235	217962	0	92	0.0121403	0.00847094	0.017399
Three-dose	236	217870	0	91	0.0121403	0.00847094	0.017399
Three-dose	237	217779	0	93	0.0121403	0.00847094	0.017399
Three-dose	238	217686	0	84	0.0121403	0.00847094	0.017399
Three-dose	239	217602	0	74	0.0121403	0.00847094	0.017399
Three-dose	240	217528	0	89	0.0121403	0.00847094	0.017399
Three-dose	241	217439	0	86	0.0121403	0.00847094	0.017399
Three-dose	242	217353	0	79	0.0121403	0.00847094	0.017399
Three-dose	243	217274	0	78	0.0121403	0.00847094	0.017399
Three-dose	244	217196	0	90	0.0121403	0.00847094	0.017399
Three-dose	245	217106	0	101	0.0121403	0.00847094	0.017399
Three-dose	246	217005	1	76	0.0126011	0.00884387	0.0179544
Three-dose	247	216928	0	99	0.0126011	0.00884387	0.0179544
Three-dose	248	216829	0	90	0.0126011	0.00884387	0.0179544
Three-dose	249	216739	0	97	0.0126011	0.00884387	0.0179544
Three-dose	250	216642	0	75	0.0126011	0.00884387	0.0179544
Three-dose	251	216567	0	76	0.0126011	0.00884387	0.0179544
Three-dose	252	216491	0	94	0.0126011	0.00884387	0.0179544
Three-dose	253	216397	0	80	0.0126011	0.00884387	0.0179544
Three-dose	254	216317	2	83	0.0135255	0.00959643	0.0190632
Three-dose	255	216232	0	74	0.0135255	0.00959643	0.0190632
Three-dose	256	216158	0	95	0.0135255	0.00959643	0.0190632
Three-dose	257	216063	0	81	0.0135255	0.00959643	0.0190632
Three-dose	258	215982	0	92	0.0135255	0.00959643	0.0190632
Three-dose	259	215890	0	74	0.0135255	0.00959643	0.0190632
Three-dose	260	215816	3	86	0.0149154	0.0107383	0.0207173
Three-dose	261	215727	0	60	0.0149154	0.0107383	0.0207173
Three-dose	262	215667	0	79	0.0149154	0.0107383	0.0207173
Three-dose	263	215588	0	86	0.0149154	0.0107383	0.0207173
Three-dose	264	215502	0	64	0.0149154	0.0107383	0.0207173
Three-dose	265	215438	0	62	0.0149154	0.0107383	0.0207173
Three-dose	266	215376	0	69	0.0149154	0.0107383	0.0207173
Three-dose	267	215307	0	79	0.0149154	0.0107383	0.0207173
Three-dose	268	215228	0	68	0.0149154	0.0107383	0.0207173
Three-dose	269	215160	0	74	0.0149154	0.0107383	0.0207173
Three-dose	270	215086	0	64	0.0149154	0.0107383	0.0207173
Three-dose	271	215022	0	70	0.0149154	0.0107383	0.0207173
Three-dose	272	214952	0	68	0.0149154	0.0107383	0.0207173
Three-dose	273	214884	0	74	0.0149154	0.0107383	0.0207173
Three-dose	274	214810	0	77	0.0149154	0.0107383	0.0207173
Three-dose	275	214733	1	54	0.015381	0.0111231	0.0212688
Three-dose	276	214678	0	76	0.015381	0.0111231	0.0212688
Three-dose	277	214602	0	63	0.015381	0.0111231	0.0212688
Three-dose	278	214539	0	65	0.015381	0.0111231	0.0212688
Three-dose	279	214474	0	75	0.015381	0.0111231	0.0212688
Three-dose	280	214399	0	63	0.015381	0.0111231	0.0212688
Three-dose	281	214336	0	78	0.015381	0.0111231	0.0212688
Three-dose	282	214258	0	72	0.015381	0.0111231	0.0212688
Three-dose	283	214186	0	57	0.015381	0.0111231	0.0212688
Three-dose	284	214129	0	59	0.015381	0.0111231	0.0212688
Three-dose	285	214070	0	68	0.015381	0.0111231	0.0212688
Three-dose	286	214002	0	62	0.015381	0.0111231	0.0212688
Three-dose	287	213940	1	70	0.0158484	0.0115104	0.0218211
Three-dose	288	213869	0	56	0.0158484	0.0115104	0.0218211
Three-dose	289	213813	0	61	0.0158484	0.0115104	0.0218211
Three-dose	290	213752	0	60	0.0158484	0.0115104	0.0218211
Three-dose	291	213692	0	59	0.0158484	0.0115104	0.0218211
Three-dose	292	213633	0	77	0.0158484	0.0115104	0.0218211
Three-dose	293	213556	0	58	0.0158484	0.0115104	0.0218211
Three-dose	294	213498	0	57	0.0158484	0.0115104	0.0218211
Three-dose	295	213441	0	56	0.0158484	0.0115104	0.0218211
Three-dose	296	213385	0	59	0.0158484	0.0115104	0.0218211
Three-dose	297	213326	0	71	0.0158484	0.0115104	0.0218211
Three-dose	298	213255	1	42	0.0163172	0.0118999	0.0223742
Three-dose	299	213212	0	57	0.0163172	0.0118999	0.0223742
Three-dose	300	213155	1	58	0.0167863	0.0122907	0.022926
Three-dose	301	213096	0	75	0.0167863	0.0122907	0.022926
Three-dose	302	213021	0	50	0.0167863	0.0122907	0.022926
Three-dose	303	212971	0	55	0.0167863	0.0122907	0.022926
Three-dose	304	212916	0	53	0.0167863	0.0122907	0.022926
Three-dose	305	212863	0	46	0.0167863	0.0122907	0.022926
Three-dose	306	212817	1	54	0.0172561	0.0126832	0.0234776
Three-dose	307	212762	0	66	0.0172561	0.0126832	0.0234776
Three-dose	308	212696	0	66	0.0172561	0.0126832	0.0234776
Three-dose	309	212630	0	64	0.0172561	0.0126832	0.0234776
Three-dose	310	212566	0	61	0.0172561	0.0126832	0.0234776
Three-dose	311	212505	0	51	0.0172561	0.0126832	0.0234776
Three-dose	312	212454	0	38	0.0172561	0.0126832	0.0234776
Three-dose	313	212416	0	46	0.0172561	0.0126832	0.0234776
Three-dose	314	212370	0	50	0.0172561	0.0126832	0.0234776
Three-dose	315	212320	0	58	0.0172561	0.0126832	0.0234776
Three-dose	316	212262	0	48	0.0172561	0.0126832	0.0234776
Three-dose	317	212214	0	61	0.0172561	0.0126832	0.0234776
Three-dose	318	212153	0	34	0.0172561	0.0126832	0.0234776
Three-dose	319	212119	0	46	0.0172561	0.0126832	0.0234776
Three-dose	320	212073	0	39	0.0172561	0.0126832	0.0234776
Three-dose	321	212034	0	36	0.0172561	0.0126832	0.0234776
Three-dose	322	211998	0	46	0.0172561	0.0126832	0.0234776
Three-dose	323	211952	0	56	0.0172561	0.0126832	0.0234776
Three-dose	324	211896	0	48	0.0172561	0.0126832	0.0234776
Three-dose	325	211848	0	53	0.0172561	0.0126832	0.0234776
Three-dose	326	211795	0	33	0.0172561	0.0126832	0.0234776
Three-dose	327	211762	1	38	0.0177283	0.0130784	0.0240312
Three-dose	328	211723	0	41	0.0177283	0.0130784	0.0240312
Three-dose	329	211682	1	49	0.0182006	0.0134747	0.0245837
Three-dose	330	211632	1	43	0.018673	0.0138721	0.0251352
Three-dose	331	211588	0	39	0.018673	0.0138721	0.0251352
Three-dose	332	211549	0	27	0.018673	0.0138721	0.0251352
Three-dose	333	211522	0	33	0.018673	0.0138721	0.0251352
Three-dose	334	211489	0	34	0.018673	0.0138721	0.0251352
Three-dose	335	211455	0	34	0.018673	0.0138721	0.0251352
Three-dose	336	211421	0	32	0.018673	0.0138721	0.0251352
Three-dose	337	211389	0	35	0.018673	0.0138721	0.0251352
Three-dose	338	211354	0	31	0.018673	0.0138721	0.0251352
Three-dose	339	211323	0	32	0.018673	0.0138721	0.0251352
Three-dose	340	211291	0	33	0.018673	0.0138721	0.0251352
Three-dose	341	211258	0	25	0.018673	0.0138721	0.0251352
Three-dose	342	211233	0	40	0.018673	0.0138721	0.0251352
Three-dose	343	211193	0	38	0.018673	0.0138721	0.0251352
Three-dose	344	211155	0	39	0.018673	0.0138721	0.0251352
Three-dose	345	211116	1	31	0.0191466	0.0142714	0.0256871
Three-dose	346	211084	0	26	0.0191466	0.0142714	0.0256871
Three-dose	347	211058	0	21	0.0191466	0.0142714	0.0256871
Three-dose	348	211037	0	25	0.0191466	0.0142714	0.0256871
Three-dose	349	211012	1	32	0.0196204	0.0146717	0.0262382
Three-dose	350	210979	0	27	0.0196204	0.0146717	0.0262382
Three-dose	351	210952	0	30	0.0196204	0.0146717	0.0262382
Three-dose	352	210922	0	32	0.0196204	0.0146717	0.0262382
Three-dose	353	210890	0	21	0.0196204	0.0146717	0.0262382
Three-dose	354	210869	0	34	0.0196204	0.0146717	0.0262382
Three-dose	355	210835	0	41	0.0196204	0.0146717	0.0262382
Three-dose	356	210794	0	29	0.0196204	0.0146717	0.0262382
Three-dose	357	210765	1	32	0.0200948	0.0150733	0.026789
Three-dose	358	210732	0	42	0.0200948	0.0150733	0.026789
Three-dose	359	210690	1	28	0.0205693	0.0154759	0.0273389
Three-dose	360	210661	2	15	0.0215185	0.0162837	0.0284361
Three-dose	361	210644	1	30	0.0219932	0.0166888	0.0289833
Three-dose	362	210613	0	35	0.0219932	0.0166888	0.0289833
Three-dose	363	210578	0	20	0.0219932	0.0166888	0.0289833
Three-dose	364	210558	0	44	0.0219932	0.0166888	0.0289833
Three-dose	365	210514	0	33	0.0219932	0.0166888	0.0289833
Three-dose	366	210481	0	24	0.0219932	0.0166888	0.0289833
Three-dose	367	210457	0	36	0.0219932	0.0166888	0.0289833
Three-dose	368	210421	0	20	0.0219932	0.0166888	0.0289833
Three-dose	369	210401	0	27	0.0219932	0.0166888	0.0289833
Three-dose	370	210374	0	22	0.0219932	0.0166888	0.0289833
Three-dose	371	210352	0	31	0.0219932	0.0166888	0.0289833
Three-dose	372	210321	0	33	0.0219932	0.0166888	0.0289833
Three-dose	373	210288	1	26	0.0224686	0.0170952	0.0295307
Three-dose	374	210261	0	24	0.0224686	0.0170952	0.0295307
Three-dose	375	210237	0	24	0.0224686	0.0170952	0.0295307
Three-dose	376	210213	1	24	0.0229442	0.0175025	0.0300774
Three-dose	377	210188	1	32	0.0234198	0.0179106	0.0306234
Three-dose	378	210155	0	18	0.0234198	0.0179106	0.0306234
Three-dose	379	210137	0	25	0.0234198	0.0179106	0.0306234
Three-dose	380	210112	0	24	0.0234198	0.0179106	0.0306234
Three-dose	381	210088	1	17	0.0238957	0.0183196	0.0311689
Three-dose	382	210070	0	13	0.0238957	0.0183196	0.0311689
Three-dose	383	210057	0	13	0.0238957	0.0183196	0.0311689
Three-dose	384	210044	0	31	0.0238957	0.0183196	0.0311689
Three-dose	385	210013	0	23	0.0238957	0.0183196	0.0311689
Three-dose	386	209990	0	23	0.0238957	0.0183196	0.0311689
Three-dose	387	209967	1	27	0.0243719	0.0187294	0.031714
Three-dose	388	209939	0	13	0.0243719	0.0187294	0.031714
Three-dose	389	209926	0	17	0.0243719	0.0187294	0.031714
Three-dose	390	209909	0	20	0.0243719	0.0187294	0.031714
Three-dose	391	209889	0	30	0.0243719	0.0187294	0.031714
Three-dose	392	209859	0	19	0.0243719	0.0187294	0.031714
Three-dose	393	209840	0	27	0.0243719	0.0187294	0.031714
Three-dose	394	209813	1	14	0.0248484	0.0191401	0.0322588
Three-dose	395	209798	0	21	0.0248484	0.0191401	0.0322588
Three-dose	396	209777	0	18	0.0248484	0.0191401	0.0322588
Three-dose	397	209759	0	33	0.0248484	0.0191401	0.0322588
Three-dose	398	209726	1	28	0.0253251	0.0195516	0.0328031
Three-dose	399	209697	0	23	0.0253251	0.0195516	0.0328031
Three-dose	400	209674	0	24	0.0253251	0.0195516	0.0328031
Three-dose	401	209650	0	24	0.0253251	0.0195516	0.0328031
Three-dose	402	209626	0	7	0.0253251	0.0195516	0.0328031
Three-dose	403	209619	1	10	0.025802	0.019964	0.033347
Three-dose	404	209608	0	26	0.025802	0.019964	0.033347
Three-dose	405	209582	0	34	0.025802	0.019964	0.033347
Three-dose	406	209548	0	15	0.025802	0.019964	0.033347
Three-dose	407	209533	1	20	0.0262791	0.0203771	0.0338904
Three-dose	408	209512	0	31	0.0262791	0.0203771	0.0338904
Three-dose	409	209481	0	19	0.0262791	0.0203771	0.0338904
Three-dose	410	209462	1	7	0.0267564	0.0207908	0.0344334
Three-dose	411	209454	1	41	0.0272337	0.0212052	0.0349758
Three-dose	412	209412	0	25	0.0272337	0.0212052	0.0349758
Three-dose	413	209387	1	22	0.0277112	0.0216203	0.0355177
Three-dose	414	209364	0	17	0.0277112	0.0216203	0.0355177
Three-dose	415	209347	0	19	0.0277112	0.0216203	0.0355177
Three-dose	416	209328	0	13	0.0277112	0.0216203	0.0355177
Three-dose	417	209315	0	10	0.0277112	0.0216203	0.0355177
Three-dose	418	209305	0	16	0.0277112	0.0216203	0.0355177
Three-dose	419	209289	0	30	0.0277112	0.0216203	0.0355177
Three-dose	420	209259	1	15	0.0281889	0.0220361	0.0360594
Three-dose	421	209243	0	31	0.0281889	0.0220361	0.0360594
Three-dose	422	209212	0	29	0.0281889	0.0220361	0.0360594
Three-dose	423	209183	0	9	0.0281889	0.0220361	0.0360594
Three-dose	424	209174	0	9	0.0281889	0.0220361	0.0360594
Three-dose	425	209165	2	23	0.0291448	0.0228696	0.0371416
Three-dose	426	209140	0	36	0.0291448	0.0228696	0.0371416
Three-dose	427	209104	0	34	0.0291448	0.0228696	0.0371416
Three-dose	428	209070	2	40	0.0301012	0.0237055	0.038222
Three-dose	429	209028	0	23	0.0301012	0.0237055	0.038222
Three-dose	430	209005	1	19	0.0305795	0.0241243	0.0387616
Three-dose	431	208985	0	12	0.0305795	0.0241243	0.0387616
Three-dose	432	208973	0	20	0.0305795	0.0241243	0.0387616
Three-dose	433	208953	1	33	0.0310579	0.0245437	0.0393008
Three-dose	434	208919	1	13	0.0315364	0.0249635	0.0398396
Three-dose	435	208905	0	33	0.0315364	0.0249635	0.0398396
Three-dose	436	208872	0	20	0.0315364	0.0249635	0.0398396
Three-dose	437	208852	0	10	0.0315364	0.0249635	0.0398396
Three-dose	438	208842	0	12	0.0315364	0.0249635	0.0398396
Three-dose	439	208830	0	24	0.0315364	0.0249635	0.0398396
Three-dose	440	208806	1	38	0.0320152	0.0253841	0.0403782
Three-dose	441	208767	0	20	0.0320152	0.0253841	0.0403782
Three-dose	442	208747	0	40	0.0320152	0.0253841	0.0403782
Three-dose	443	208707	0	47	0.0320152	0.0253841	0.0403782
Three-dose	444	208660	0	9	0.0320152	0.0253841	0.0403782
Three-dose	445	208651	0	9	0.0320152	0.0253841	0.0403782
Three-dose	446	208642	0	41	0.0320152	0.0253841	0.0403782
Three-dose	447	208601	0	42	0.0320152	0.0253841	0.0403782
Three-dose	448	208559	1	25	0.0324945	0.0258055	0.0409171
Three-dose	449	208533	0	49	0.0324945	0.0258055	0.0409171
Three-dose	450	208484	0	38	0.0324945	0.0258055	0.0409171
Three-dose	451	208446	0	15	0.0324945	0.0258055	0.0409171
Three-dose	452	208431	0	5	0.0324945	0.0258055	0.0409171
Three-dose	453	208426	0	50	0.0324945	0.0258055	0.0409171
Three-dose	454	208376	0	61	0.0324945	0.0258055	0.0409171
Three-dose	455	208315	0	22	0.0324945	0.0258055	0.0409171
Three-dose	456	208293	1	30	0.0329745	0.0262278	0.0414562
Three-dose	457	208262	0	51	0.0329745	0.0262278	0.0414562
Three-dose	458	208211	0	15	0.0329745	0.0262278	0.0414562
Three-dose	459	208196	0	18	0.0329745	0.0262278	0.0414562
Three-dose	460	208178	1	38	0.0334547	0.0266507	0.0419952
Three-dose	461	208139	0	58	0.0334547	0.0266507	0.0419952
Three-dose	462	208081	0	35	0.0334547	0.0266507	0.0419952
Three-dose	463	208046	0	33	0.0334547	0.0266507	0.0419952
Three-dose	464	208013	2	39	0.0344158	0.0274985	0.0430728
Three-dose	465	207972	0	16	0.0344158	0.0274985	0.0430728
Three-dose	466	207956	1	17	0.0348965	0.0279231	0.0436111
Three-dose	467	207938	0	51	0.0348965	0.0279231	0.0436111
Three-dose	468	207887	0	50	0.0348965	0.0279231	0.0436111
Three-dose	469	207837	0	41	0.0348965	0.0279231	0.0436111
Three-dose	470	207796	0	30	0.0348965	0.0279231	0.0436111
Three-dose	471	207766	0	45	0.0348965	0.0279231	0.0436111
Three-dose	472	207721	0	13	0.0348965	0.0279231	0.0436111
Three-dose	473	207708	1	12	0.0353778	0.0283485	0.0441497
Three-dose	474	207695	0	46	0.0353778	0.0283485	0.0441497
Three-dose	475	207649	0	28	0.0353778	0.0283485	0.0441497
Three-dose	476	207621	0	29	0.0353778	0.0283485	0.0441497
Three-dose	477	207592	0	25	0.0353778	0.0283485	0.0441497
Three-dose	478	207567	0	13	0.0353778	0.0283485	0.0441497
Three-dose	479	207554	0	13	0.0353778	0.0283485	0.0441497
Three-dose	480	207541	0	12	0.0353778	0.0283485	0.0441497
Three-dose	481	207529	0	61	0.0353778	0.0283485	0.0441497
Three-dose	482	207468	0	43	0.0353778	0.0283485	0.0441497
Three-dose	483	207425	0	22	0.0353778	0.0283485	0.0441497
Three-dose	484	207403	0	21	0.0353778	0.0283485	0.0441497
Three-dose	485	207382	1	31	0.0358598	0.0287749	0.0446888
Three-dose	486	207350	0	12	0.0358598	0.0287749	0.0446888
Three-dose	487	207338	0	7	0.0358598	0.0287749	0.0446888
Three-dose	488	207331	0	44	0.0358598	0.0287749	0.0446888
Three-dose	489	207287	0	27	0.0358598	0.0287749	0.0446888
Three-dose	490	207260	1	29	0.0363421	0.0292019	0.0452279
Three-dose	491	207230	0	41	0.0363421	0.0292019	0.0452279
Three-dose	492	207189	0	37	0.0363421	0.0292019	0.0452279
Three-dose	493	207152	1	15	0.0368247	0.0296295	0.0457668
Three-dose	494	207136	1	16	0.0373073	0.0300574	0.0463054
Three-dose	495	207119	0	37	0.0373073	0.0300574	0.0463054
Three-dose	496	207082	0	39	0.0373073	0.0300574	0.0463054
Three-dose	497	207043	1	31	0.0377901	0.0304859	0.0468439
Three-dose	498	207011	0	32	0.0377901	0.0304859	0.0468439
Three-dose	499	206979	0	35	0.0377901	0.0304859	0.0468439
Three-dose	500	206944	0	6	0.0377901	0.0304859	0.0468439
Three-dose	501	206938	0	15	0.0377901	0.0304859	0.0468439
Three-dose	502	206923	1	41	0.0382732	0.030915	0.0473823
Three-dose	503	206881	1	29	0.0387564	0.0313445	0.0479205
Three-dose	504	206851	0	27	0.0387564	0.0313445	0.0479205
Three-dose	505	206824	0	29	0.0387564	0.0313445	0.0479205
Three-dose	506	206795	0	37	0.0387564	0.0313445	0.0479205
Three-dose	507	206758	0	6	0.0387564	0.0313445	0.0479205
Three-dose	508	206752	0	6	0.0387564	0.0313445	0.0479205
Three-dose	509	206746	0	39	0.0387564	0.0313445	0.0479205
Three-dose	510	206707	0	56	0.0387564	0.0313445	0.0479205
Three-dose	511	206651	0	43	0.0387564	0.0313445	0.0479205
Three-dose	512	206608	0	44	0.0387564	0.0313445	0.0479205
Three-dose	513	206564	0	59	0.0387564	0.0313445	0.0479205
Three-dose	514	206505	1	13	0.0392404	0.031775	0.0484594
Three-dose	515	206491	0	14	0.0392404	0.031775	0.0484594
Three-dose	516	206477	0	58	0.0392404	0.031775	0.0484594
Three-dose	517	206419	0	59	0.0392404	0.031775	0.0484594
Three-dose	518	206360	0	50	0.0392404	0.031775	0.0484594
Three-dose	519	206310	0	64	0.0392404	0.031775	0.0484594
Three-dose	520	206246	0	77	0.0392404	0.031775	0.0484594
Three-dose	521	206169	0	26	0.0392404	0.031775	0.0484594
Three-dose	522	206143	0	20	0.0392404	0.031775	0.0484594
Three-dose	523	206123	1	58	0.0397254	0.0322066	0.048999
Three-dose	524	206064	0	99	0.0397254	0.0322066	0.048999
Three-dose	525	205965	0	69	0.0397254	0.0322066	0.048999
Three-dose	526	205896	1	89	0.0402109	0.032639	0.049539
Three-dose	527	205806	0	104	0.0402109	0.032639	0.049539
Three-dose	528	205702	0	20	0.0402109	0.032639	0.049539
Three-dose	529	205682	0	21	0.0402109	0.032639	0.049539
Three-dose	530	205661	0	115	0.0402109	0.032639	0.049539
Three-dose	531	205546	0	108	0.0402109	0.032639	0.049539
Three-dose	532	205438	0	88	0.0402109	0.032639	0.049539
Three-dose	533	205350	0	86	0.0402109	0.032639	0.049539
Three-dose	534	205264	0	92	0.0402109	0.032639	0.049539
Three-dose	535	205172	1	26	0.0406981	0.033073	0.0500807
Three-dose	536	205145	0	31	0.0406981	0.033073	0.0500807
Three-dose	537	205114	0	122	0.0406981	0.033073	0.0500807
Three-dose	538	204992	0	104	0.0406981	0.033073	0.0500807
Three-dose	539	204888	0	72	0.0406981	0.033073	0.0500807
Three-dose	540	204816	1	113	0.0411861	0.0335081	0.0506231
Three-dose	541	204702	0	105	0.0411861	0.0335081	0.0506231
Three-dose	542	204597	0	29	0.0411861	0.0335081	0.0506231
Three-dose	543	204568	0	29	0.0411861	0.0335081	0.0506231
Three-dose	544	204539	0	119	0.0411861	0.0335081	0.0506231
Three-dose	545	204420	0	135	0.0411861	0.0335081	0.0506231
Three-dose	546	204285	0	100	0.0411861	0.0335081	0.0506231
Three-dose	547	204185	0	122	0.0411861	0.0335081	0.0506231
Three-dose	548	204063	0	122	0.0411861	0.0335081	0.0506231
Three-dose	549	203941	0	33	0.0411861	0.0335081	0.0506231
Three-dose	550	203908	0	45	0.0411861	0.0335081	0.0506231
Three-dose	551	203863	1	99	0.0416765	0.0339453	0.051168
Three-dose	552	203763	1	159	0.042167	0.034383	0.0517128
Three-dose	553	203603	0	98	0.042167	0.034383	0.0517128
Three-dose	554	203505	0	96	0.042167	0.034383	0.0517128
Three-dose	555	203409	0	128	0.042167	0.034383	0.0517128
Three-dose	556	203281	1	21	0.0426587	0.0348219	0.0522588
Three-dose	557	203259	0	20	0.0426587	0.0348219	0.0522588
Three-dose	558	203239	0	145	0.0426587	0.0348219	0.0522588
Three-dose	559	203094	0	136	0.0426587	0.0348219	0.0522588
Three-dose	560	202958	0	90	0.0426587	0.0348219	0.0522588
Three-dose	561	202868	0	112	0.0426587	0.0348219	0.0522588
Three-dose	562	202756	0	164	0.0426587	0.0348219	0.0522588
Three-dose	563	202592	0	40	0.0426587	0.0348219	0.0522588
Three-dose	564	202552	0	26	0.0426587	0.0348219	0.0522588
Three-dose	565	202526	0	145	0.0426587	0.0348219	0.0522588
Three-dose	566	202381	1	137	0.0431526	0.035263	0.0528071
Three-dose	567	202243	0	98	0.0431526	0.035263	0.0528071
Three-dose	568	202145	0	109	0.0431526	0.035263	0.0528071
Three-dose	569	202036	0	116	0.0431526	0.035263	0.0528071
Three-dose	570	201920	0	34	0.0431526	0.035263	0.0528071
Three-dose	571	201886	0	23	0.0431526	0.035263	0.0528071
Three-dose	572	201863	0	129	0.0431526	0.035263	0.0528071
Three-dose	573	201734	0	134	0.0431526	0.035263	0.0528071
Three-dose	574	201600	0	90	0.0431526	0.035263	0.0528071
Three-dose	575	201510	0	144	0.0431526	0.035263	0.0528071
Three-dose	576	201366	0	152	0.0431526	0.035263	0.0528071
Three-dose	577	201214	0	47	0.0431526	0.035263	0.0528071
Three-dose	578	201167	0	27	0.0431526	0.035263	0.0528071
Three-dose	579	201140	0	166	0.0431526	0.035263	0.0528071
Three-dose	580	200974	0	146	0.0431526	0.035263	0.0528071
Three-dose	581	200828	0	90	0.0431526	0.035263	0.0528071
Three-dose	582	200738	0	144	0.0431526	0.035263	0.0528071
Three-dose	583	200594	0	171	0.0431526	0.035263	0.0528071
Three-dose	584	200423	1	47	0.0436514	0.0357082	0.053361
Three-dose	585	200375	0	20	0.0436514	0.0357082	0.053361
Three-dose	586	200355	0	186	0.0436514	0.0357082	0.053361
Three-dose	587	200169	0	152	0.0436514	0.0357082	0.053361
Three-dose	588	200017	0	175	0.0436514	0.0357082	0.053361
Three-dose	589	199842	1	179	0.0441516	0.0361549	0.0539164
Three-dose	590	199662	0	229	0.0441516	0.0361549	0.0539164
Three-dose	591	199433	0	59	0.0441516	0.0361549	0.0539164
Three-dose	592	199374	1	27	0.0446529	0.0366028	0.0544729
Three-dose	593	199346	0	206	0.0446529	0.0366028	0.0544729
Three-dose	594	199140	1	187	0.0451548	0.0370516	0.0550298
Three-dose	595	198952	0	167	0.0451548	0.0370516	0.0550298
Three-dose	596	198785	0	191	0.0451548	0.0370516	0.0550298
Three-dose	597	198594	0	256	0.0451548	0.0370516	0.0550298
Three-dose	598	198338	0	67	0.0451548	0.0370516	0.0550298
Three-dose	599	198271	0	41	0.0451548	0.0370516	0.0550298
Three-dose	600	198230	0	212	0.0451548	0.0370516	0.0550298
Three-dose	601	198018	1	206	0.0456596	0.0375029	0.0555898
Three-dose	602	197811	0	190	0.0456596	0.0375029	0.0555898
Three-dose	603	197621	0	228	0.0456596	0.0375029	0.0555898
Three-dose	604	197393	0	290	0.0456596	0.0375029	0.0555898
Three-dose	605	197103	1	67	0.0461667	0.0379565	0.0561525
Three-dose	606	197035	0	35	0.0461667	0.0379565	0.0561525
Three-dose	607	197000	0	314	0.0461667	0.0379565	0.0561525
Three-dose	608	196686	0	244	0.0461667	0.0379565	0.0561525
Three-dose	609	196442	0	234	0.0461667	0.0379565	0.0561525
Three-dose	610	196208	0	224	0.0461667	0.0379565	0.0561525
Three-dose	611	195984	0	318	0.0461667	0.0379565	0.0561525
Three-dose	612	195666	1	95	0.0466776	0.0384133	0.0567193
Three-dose	613	195570	0	30	0.0466776	0.0384133	0.0567193
Three-dose	614	195540	0	304	0.0466776	0.0384133	0.0567193
Three-dose	615	195236	0	276	0.0466776	0.0384133	0.0567193
Three-dose	616	194960	0	260	0.0466776	0.0384133	0.0567193
Three-dose	617	194700	1	299	0.0471909	0.0388725	0.057289
Three-dose	618	194400	0	390	0.0471909	0.0388725	0.057289
Three-dose	619	194010	1	97	0.0477061	0.0393335	0.0578605
Three-dose	620	193912	0	42	0.0477061	0.0393335	0.0578605
Three-dose	621	193870	1	345	0.0482217	0.039795	0.0584322
Three-dose	622	193524	0	320	0.0482217	0.039795	0.0584322
Three-dose	623	193204	0	286	0.0482217	0.039795	0.0584322
Three-dose	624	192918	0	332	0.0482217	0.039795	0.0584322
Three-dose	625	192586	0	412	0.0482217	0.039795	0.0584322
Three-dose	626	192174	1	133	0.0487418	0.0402606	0.0590091
Three-dose	627	192040	0	59	0.0487418	0.0402606	0.0590091
Three-dose	628	191981	0	407	0.0487418	0.0402606	0.0590091
Three-dose	629	191574	0	421	0.0487418	0.0402606	0.0590091
Three-dose	630	191153	0	365	0.0487418	0.0402606	0.0590091
Three-dose	631	190788	1	492	0.0492657	0.0407295	0.0595904
Three-dose	632	190295	0	479	0.0492657	0.0407295	0.0595904
Three-dose	633	189816	0	114	0.0492657	0.0407295	0.0595904
Three-dose	634	189702	0	74	0.0492657	0.0407295	0.0595904
Three-dose	635	189628	0	210	0.0492657	0.0407295	0.0595904
Three-dose	636	189418	0	155	0.0492657	0.0407295	0.0595904
Three-dose	637	189263	0	160	0.0492657	0.0407295	0.0595904
Three-dose	638	189103	0	148	0.0492657	0.0407295	0.0595904
Three-dose	639	188955	0	134	0.0492657	0.0407295	0.0595904
Three-dose	640	188821	0	55	0.0492657	0.0407295	0.0595904
Three-dose	641	188766	0	80	0.0492657	0.0407295	0.0595904
Three-dose	642	188686	1	393	0.0497954	0.0412035	0.0601785
Three-dose	643	188292	0	293	0.0497954	0.0412035	0.0601785
Three-dose	644	187999	1	336	0.0503271	0.0416793	0.0607686
Three-dose	645	187662	0	409	0.0503271	0.0416793	0.0607686
Three-dose	646	187253	1	489	0.0508608	0.0421571	0.061361
Three-dose	647	186763	1	144	0.051396	0.0426364	0.0619548
Three-dose	648	186618	0	95	0.051396	0.0426364	0.0619548
Three-dose	649	186523	0	355	0.051396	0.0426364	0.0619548
Three-dose	650	186168	1	339	0.0519329	0.0431173	0.0625502
Three-dose	651	185828	2	339	0.0530086	0.0440818	0.0637425
Three-dose	652	185487	0	401	0.0530086	0.0440818	0.0637425
Three-dose	653	185086	0	486	0.0530086	0.0440818	0.0637425
Three-dose	654	184600	1	132	0.05355	0.0445673	0.0643426
Three-dose	655	184467	0	108	0.05355	0.0445673	0.0643426
Three-dose	656	184359	1	440	0.0540921	0.0450538	0.0649431
Three-dose	657	183918	0	424	0.0540921	0.0450538	0.0649431
Three-dose	658	183494	0	386	0.0540921	0.0450538	0.0649431
Three-dose	659	183108	0	500	0.0540921	0.0450538	0.0649431
Three-dose	660	182608	1	517	0.0546395	0.0455447	0.0655497
Three-dose	661	182090	2	154	0.0557372	0.0465301	0.0667656
Three-dose	662	181934	0	109	0.0557372	0.0465301	0.0667656
Three-dose	663	181825	0	514	0.0557372	0.0465301	0.0667656
Three-dose	664	181311	0	467	0.0557372	0.0465301	0.0667656
Three-dose	665	180844	0	453	0.0557372	0.0465301	0.0667656
Three-dose	666	180391	0	600	0.0557372	0.0465301	0.0667656
Three-dose	667	179791	0	609	0.0557372	0.0465301	0.0667656
Three-dose	668	179182	0	203	0.0557372	0.0465301	0.0667656
Three-dose	669	178979	0	173	0.0557372	0.0465301	0.0667656
Three-dose	670	178806	0	584	0.0557372	0.0465301	0.0667656
Three-dose	671	178222	1	547	0.056298	0.0470329	0.0673877
Three-dose	672	177674	0	462	0.056298	0.0470329	0.0673877
Three-dose	673	177212	1	555	0.056862	0.0475385	0.0680133
Three-dose	674	176656	0	630	0.056862	0.0475385	0.0680133
Three-dose	675	176026	0	155	0.056862	0.0475385	0.0680133
Three-dose	676	175871	0	22	0.056862	0.0475385	0.0680133
Three-dose	677	175849	0	636	0.056862	0.0475385	0.0680133
Three-dose	678	175213	0	571	0.056862	0.0475385	0.0680133
Three-dose	679	174642	0	510	0.056862	0.0475385	0.0680133
Three-dose	680	174132	0	530	0.056862	0.0475385	0.0680133
Three-dose	681	173602	0	625	0.056862	0.0475385	0.0680133
Three-dose	682	172977	0	204	0.056862	0.0475385	0.0680133
Three-dose	683	172773	0	198	0.056862	0.0475385	0.0680133
Three-dose	684	172575	0	715	0.056862	0.0475385	0.0680133
Three-dose	685	171860	0	569	0.056862	0.0475385	0.0680133
Three-dose	686	171291	0	604	0.056862	0.0475385	0.0680133
Three-dose	687	170687	0	664	0.056862	0.0475385	0.0680133
Three-dose	688	170023	0	777	0.056862	0.0475385	0.0680133
Three-dose	689	169246	1	250	0.0574525	0.0480659	0.0686716
Three-dose	690	168995	0	107	0.0574525	0.0480659	0.0686716
Three-dose	691	168888	0	747	0.0574525	0.0480659	0.0686716
Three-dose	692	168141	1	820	0.0580469	0.0485967	0.0693341
Three-dose	693	167320	0	738	0.0580469	0.0485967	0.0693341
Three-dose	694	166582	0	696	0.0580469	0.0485967	0.0693341
Three-dose	695	165886	0	743	0.0580469	0.0485967	0.0693341
Three-dose	696	165143	0	365	0.0580469	0.0485967	0.0693341
Three-dose	697	164778	0	288	0.0580469	0.0485967	0.0693341
Three-dose	698	164490	0	884	0.0580469	0.0485967	0.0693341
Three-dose	699	163606	1	790	0.0586578	0.0491411	0.0700168
Three-dose	700	162815	0	781	0.0586578	0.0491411	0.0700168
Three-dose	701	162034	0	512	0.0586578	0.0491411	0.0700168
Three-dose	702	161522	0	531	0.0586578	0.0491411	0.0700168
Three-dose	703	160991	0	275	0.0586578	0.0491411	0.0700168
Three-dose	704	160716	1	177	0.0592796	0.0496946	0.0707127
Three-dose	705	160538	0	405	0.0592796	0.0496946	0.0707127
Three-dose	706	160133	0	226	0.0592796	0.0496946	0.0707127
Three-dose	707	159907	0	179	0.0592796	0.0496946	0.0707127
Three-dose	708	159728	1	97	0.0599053	0.0502516	0.0714129
Three-dose	709	159630	0	218	0.0599053	0.0502516	0.0714129
Three-dose	710	159412	0	174	0.0599053	0.0502516	0.0714129
Three-dose	711	159238	0	158	0.0599053	0.0502516	0.0714129
Three-dose	712	159080	0	488	0.0599053	0.0502516	0.0714129
Three-dose	713	158592	0	411	0.0599053	0.0502516	0.0714129
Three-dose	714	158181	0	478	0.0599053	0.0502516	0.0714129
Three-dose	715	157703	0	504	0.0599053	0.0502516	0.0714129
Three-dose	716	157199	0	557	0.0599053	0.0502516	0.0714129
Three-dose	717	156642	0	187	0.0599053	0.0502516	0.0714129
Three-dose	718	156455	0	189	0.0599053	0.0502516	0.0714129
Three-dose	719	156266	0	533	0.0599053	0.0502516	0.0714129
Three-dose	720	155733	0	488	0.0599053	0.0502516	0.0714129
Three-dose	721	155245	0	510	0.0599053	0.0502516	0.0714129
Three-dose	722	154735	0	443	0.0599053	0.0502516	0.0714129
Three-dose	723	154292	0	511	0.0599053	0.0502516	0.0714129
Three-dose	724	153781	0	228	0.0599053	0.0502516	0.0714129
Three-dose	725	153553	0	177	0.0599053	0.0502516	0.0714129
Three-dose	726	153376	0	497	0.0599053	0.0502516	0.0714129
Three-dose	727	152879	0	505	0.0599053	0.0502516	0.0714129
Three-dose	728	152374	0	517	0.0599053	0.0502516	0.0714129
Three-dose	729	151857	0	494	0.0599053	0.0502516	0.0714129
Three-dose	730	151363	0	542	0.0599053	0.0502516	0.0714129
Three-dose	731	150821	0	187	0.0599053	0.0502516	0.0714129
Three-dose	732	150634	0	198	0.0599053	0.0502516	0.0714129
Three-dose	733	150436	1	474	0.0605696	0.0508396	0.0721612
Three-dose	734	149961	0	464	0.0605696	0.0508396	0.0721612
Three-dose	735	149497	0	420	0.0605696	0.0508396	0.0721612
Three-dose	736	149077	0	431	0.0605696	0.0508396	0.0721612
Three-dose	737	148646	0	503	0.0605696	0.0508396	0.0721612
Three-dose	738	148143	1	172	0.0612443	0.0514362	0.0729219
Three-dose	739	147970	0	224	0.0612443	0.0514362	0.0729219
Three-dose	740	147746	0	872	0.0612443	0.0514362	0.0729219
Three-dose	741	146874	0	737	0.0612443	0.0514362	0.0729219
Three-dose	742	146137	0	716	0.0612443	0.0514362	0.0729219
Three-dose	743	145421	0	737	0.0612443	0.0514362	0.0729219
Three-dose	744	144684	0	890	0.0612443	0.0514362	0.0729219
Three-dose	745	143794	0	314	0.0612443	0.0514362	0.0729219
Three-dose	746	143480	0	269	0.0612443	0.0514362	0.0729219
Three-dose	747	143211	0	852	0.0612443	0.0514362	0.0729219
Three-dose	748	142359	0	764	0.0612443	0.0514362	0.0729219
Three-dose	749	141595	0	800	0.0612443	0.0514362	0.0729219
Three-dose	750	140795	0	858	0.0612443	0.0514362	0.0729219
Three-dose	751	139937	1	1002	0.0619584	0.0520641	0.0737325
Three-dose	752	138934	0	347	0.0619584	0.0520641	0.0737325
Three-dose	753	138587	0	306	0.0619584	0.0520641	0.0737325
Three-dose	754	138281	0	1003	0.0619584	0.0520641	0.0737325
Three-dose	755	137278	0	981	0.0619584	0.0520641	0.0737325
Three-dose	756	136297	0	970	0.0619584	0.0520641	0.0737325
Three-dose	757	135327	0	965	0.0619584	0.0520641	0.0737325
Three-dose	758	134362	0	1039	0.0619584	0.0520641	0.0737325
Three-dose	759	133323	0	353	0.0619584	0.0520641	0.0737325
Three-dose	760	132970	0	302	0.0619584	0.0520641	0.0737325
Three-dose	761	132668	0	1042	0.0619584	0.0520641	0.0737325
Three-dose	762	131626	0	924	0.0619584	0.0520641	0.0737325
Three-dose	763	130702	0	1019	0.0619584	0.0520641	0.0737325
Three-dose	764	129683	0	991	0.0619584	0.0520641	0.0737325
Three-dose	765	128692	0	1106	0.0619584	0.0520641	0.0737325
Three-dose	766	127586	0	367	0.0619584	0.0520641	0.0737325
Three-dose	767	127219	0	325	0.0619584	0.0520641	0.0737325
Three-dose	768	126894	0	1182	0.0619584	0.0520641	0.0737325
Three-dose	769	125712	0	1008	0.0619584	0.0520641	0.0737325
Three-dose	770	124704	0	1122	0.0619584	0.0520641	0.0737325
Three-dose	771	123582	0	1671	0.0619584	0.0520641	0.0737325
Three-dose	772	121911	0	1650	0.0619584	0.0520641	0.0737325
Three-dose	773	120261	0	898	0.0619584	0.0520641	0.0737325
Three-dose	774	119363	0	711	0.0619584	0.0520641	0.0737325
Three-dose	775	118652	0	1711	0.0619584	0.0520641	0.0737325
Three-dose	776	116941	0	1215	0.0619584	0.0520641	0.0737325
Three-dose	777	115726	0	1327	0.0619584	0.0520641	0.0737325
Three-dose	778	114399	0	1285	0.0619584	0.0520641	0.0737325
Three-dose	779	113114	0	1490	0.0619584	0.0520641	0.0737325
Three-dose	780	111624	0	780	0.0619584	0.0520641	0.0737325
Three-dose	781	110844	0	567	0.0619584	0.0520641	0.0737325
Three-dose	782	110277	0	1796	0.0619584	0.0520641	0.0737325
Three-dose	783	108481	0	1599	0.0619584	0.0520641	0.0737325
Three-dose	784	106882	0	1626	0.0619584	0.0520641	0.0737325
Three-dose	785	105256	0	1436	0.0619584	0.0520641	0.0737325
Three-dose	786	103820	0	1435	0.0619584	0.0520641	0.0737325
Three-dose	787	102385	0	702	0.0619584	0.0520641	0.0737325
Three-dose	788	101683	0	608	0.0619584	0.0520641	0.0737325
Three-dose	789	101075	0	1544	0.0619584	0.0520641	0.0737325
Three-dose	790	99531	0	1281	0.0619584	0.0520641	0.0737325
Three-dose	791	98250	0	1033	0.0619584	0.0520641	0.0737325
Three-dose	792	97217	1	1643	0.0629864	0.0529214	0.074965
Three-dose	793	95573	0	1681	0.0629864	0.0529214	0.074965
Three-dose	794	93892	0	843	0.0629864	0.0529214	0.074965
Three-dose	795	93049	0	657	0.0629864	0.0529214	0.074965
Three-dose	796	92392	0	1921	0.0629864	0.0529214	0.074965
Three-dose	797	90471	0	1606	0.0629864	0.0529214	0.074965
Three-dose	798	88865	1	1512	0.064111	0.0538466	0.0763313
Three-dose	799	87352	0	1657	0.064111	0.0538466	0.0763313
Three-dose	800	85695	0	1811	0.064111	0.0538466	0.0763313
Three-dose	801	83884	0	785	0.064111	0.0538466	0.0763313
Three-dose	802	83099	0	687	0.064111	0.0538466	0.0763313
Three-dose	803	82412	0	1863	0.064111	0.0538466	0.0763313
Three-dose	804	80549	0	1563	0.064111	0.0538466	0.0763313
Three-dose	805	78986	0	1525	0.064111	0.0538466	0.0763313
Three-dose	806	77461	0	1507	0.064111	0.0538466	0.0763313
Three-dose	807	75954	0	1505	0.064111	0.0538466	0.0763313
Three-dose	808	74449	0	664	0.064111	0.0538466	0.0763313
Three-dose	809	73785	0	612	0.064111	0.0538466	0.0763313
Three-dose	810	73173	0	1672	0.064111	0.0538466	0.0763313
Three-dose	811	71501	0	1504	0.064111	0.0538466	0.0763313
Three-dose	812	69997	0	1537	0.064111	0.0538466	0.0763313
Three-dose	813	68460	0	1546	0.064111	0.0538466	0.0763313
Three-dose	814	66914	0	1592	0.064111	0.0538466	0.0763313
Three-dose	815	65322	0	770	0.064111	0.0538466	0.0763313
Three-dose	816	64552	0	688	0.064111	0.0538466	0.0763313
Three-dose	817	63864	0	1752	0.064111	0.0538466	0.0763313
Three-dose	818	62112	0	1388	0.064111	0.0538466	0.0763313
Three-dose	819	60724	0	1624	0.064111	0.0538466	0.0763313
Three-dose	820	59100	0	1544	0.064111	0.0538466	0.0763313
Three-dose	821	57556	0	1601	0.064111	0.0538466	0.0763313
Three-dose	822	55955	0	963	0.064111	0.0538466	0.0763313
Three-dose	823	54992	0	864	0.064111	0.0538466	0.0763313
Three-dose	824	54128	0	1975	0.064111	0.0538466	0.0763313
Three-dose	825	52153	0	1912	0.064111	0.0538466	0.0763313
Three-dose	826	50241	0	2083	0.064111	0.0538466	0.0763313
Three-dose	827	48158	0	1831	0.064111	0.0538466	0.0763313
Three-dose	828	46327	0	1841	0.064111	0.0538466	0.0763313
Three-dose	829	44486	0	1047	0.064111	0.0538466	0.0763313
Three-dose	830	43439	0	881	0.064111	0.0538466	0.0763313
Three-dose	831	42558	0	1995	0.064111	0.0538466	0.0763313
Three-dose	832	40563	0	2329	0.064111	0.0538466	0.0763313
Three-dose	833	38234	0	1877	0.064111	0.0538466	0.0763313
Three-dose	834	36357	0	1631	0.064111	0.0538466	0.0763313
Three-dose	835	34726	0	1458	0.064111	0.0538466	0.0763313
Three-dose	836	33268	0	634	0.064111	0.0538466	0.0763313
Three-dose	837	32634	0	531	0.064111	0.0538466	0.0763313
Three-dose	838	32103	0	1302	0.064111	0.0538466	0.0763313
Three-dose	839	30801	0	1406	0.064111	0.0538466	0.0763313
Three-dose	840	29395	0	1351	0.064111	0.0538466	0.0763313
Three-dose	841	28044	0	1256	0.064111	0.0538466	0.0763313
Three-dose	842	26788	0	913	0.064111	0.0538466	0.0763313
Three-dose	843	25875	0	516	0.064111	0.0538466	0.0763313
Three-dose	844	25359	0	526	0.064111	0.0538466	0.0763313
Three-dose	845	24833	0	1195	0.064111	0.0538466	0.0763313
Three-dose	846	23638	0	1065	0.064111	0.0538466	0.0763313
Three-dose	847	22573	0	1116	0.064111	0.0538466	0.0763313
Three-dose	848	21457	0	1084	0.064111	0.0538466	0.0763313
Three-dose	849	20373	0	1071	0.064111	0.0538466	0.0763313
Three-dose	850	19302	0	494	0.064111	0.0538466	0.0763313
