# Supplementary material for: Assessing healthy vaccinee effect in COVID-19 vaccine effectiveness studies: a national cohort study in Qatar
Source: eLife. 2025 Jun 9;14:e103690. doi: 10.7554/eLife.103690 (PMC12148324; doi:10.7554/eLife.103690)
Supplement: Figure 2—source data 1. [file elife-103690-fig2-data1.xlsx]

## Sheet: Figure 2A
Main analysis		Effectiveness of second vaccine dose by month since the start of the follow-up	LB	UB	error-LB	error-UB
0	Months 1-6	0.34878	0.266362	0.456699	0.0824176	0.107919
179	Months 7-12	1.34317	0.899943	2.00469	0.443227	0.661517
359	Months 13-18	1.10153	0.616497	1.96815	0.485028	0.866621
539	Months 19-24	1.7731	1.05096	2.99146	0.722148	1.21836
719	Months 25-30	2.47306	1.32116	4.62931	1.15191	2.15625
899	Month 31+	1.45536	0.583391	3.63063	0.871971	2.17527

## Sheet: Figure 2B
	Main analysis	Effectiveness of third vaccine dose by month since the start of the follow-up	LB	UB	error-LB	error-UB
0	Months 1-6	0.312331	0.197039	0.495082	0.115291	0.182751
179	Months 7-12	1.47706	0.773882	2.81915	0.703174	1.3421
359	Months 13-18	1.49598	0.916307	2.44237	0.579673	0.946385
539	Months 19-24	1.36242	0.816795	2.27253	0.545625	0.910107
719	Month 25+	0.742421	0.248278	2.22005	0.494144	1.47763
